# Supplementary material for: Targeted Next-Generation Sequencing-Based Multiple Gene Mutation Profiling of Patients with Rectal Adenocarcinoma Receiving or Not Receiving Neoadjuvant Chemoradiotherapy
Source: MDPI journal article supplement (doi:10.3390/ijms231810353), 2022-09-08
Supplement: s1 [file s1]

# **Targeted Next-Generation Sequencing-Based Multiple Gene Mutation Profiling of Patients with Rectal Adenocarcinoma Receiving or Not Receiving Neoadjuvant Chemoradiotherapy**

**You-Kang Chang <sup>1,2,†</sup>, Hui-Hwa Tseng <sup>3,†</sup>, Chung-Man Leung <sup>4</sup>, Kuo-Cheng Lu <sup>5,6</sup> and Kuo-Wang Tsai <sup>7,\*</sup>**

## **Supplementary Figure and Table**

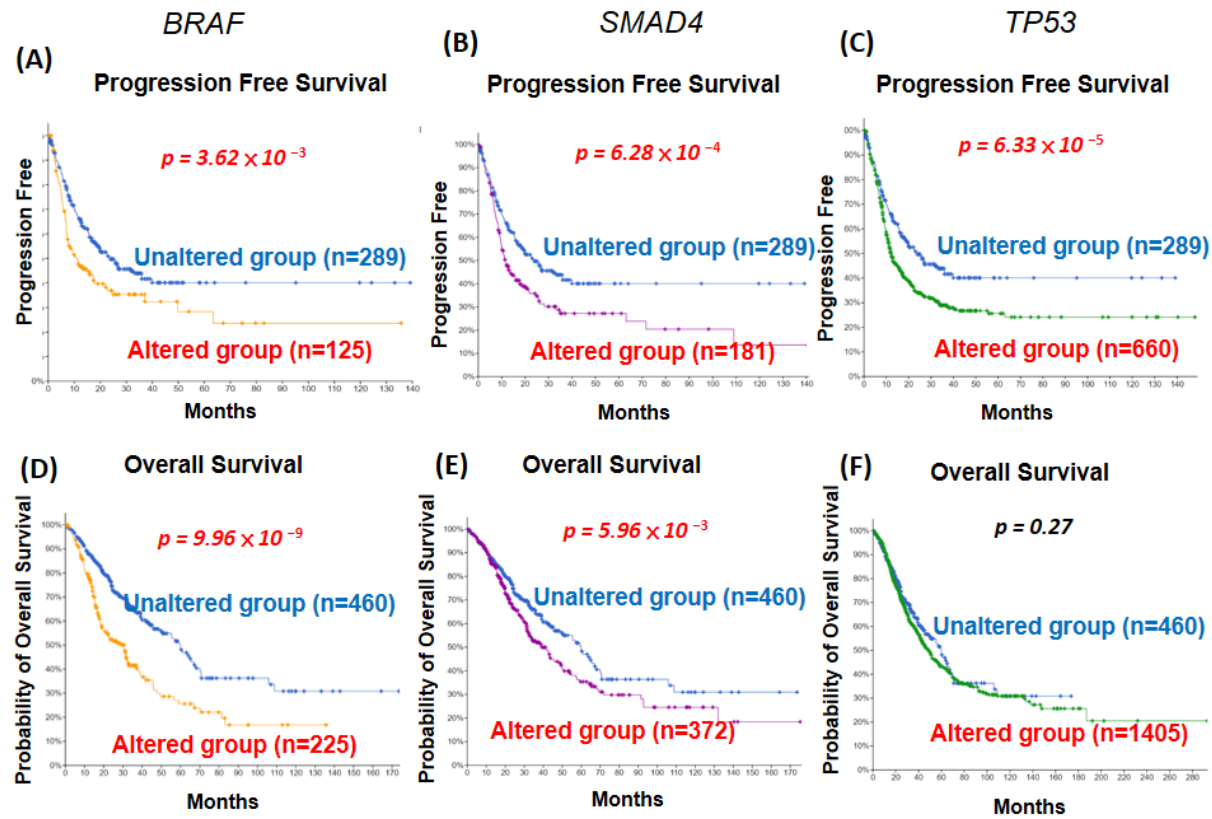

**Supplementary Figure S1.** *BRAF*, *SNAD4*, and *TP53* genetic variants as potential biomarkers for the prediction of colorectal carcinoma progression. (A–C) The effects of individual mutations in *BRAF*, *SMAD4*, and *TP53* on progression-free survival were analyzed from five rectal cancer databases. (D–F) The effects of *BRAF*, *TP53*, and *SMAD4* gene mutations on overall survival were analyzed from five rectal cancer databases.

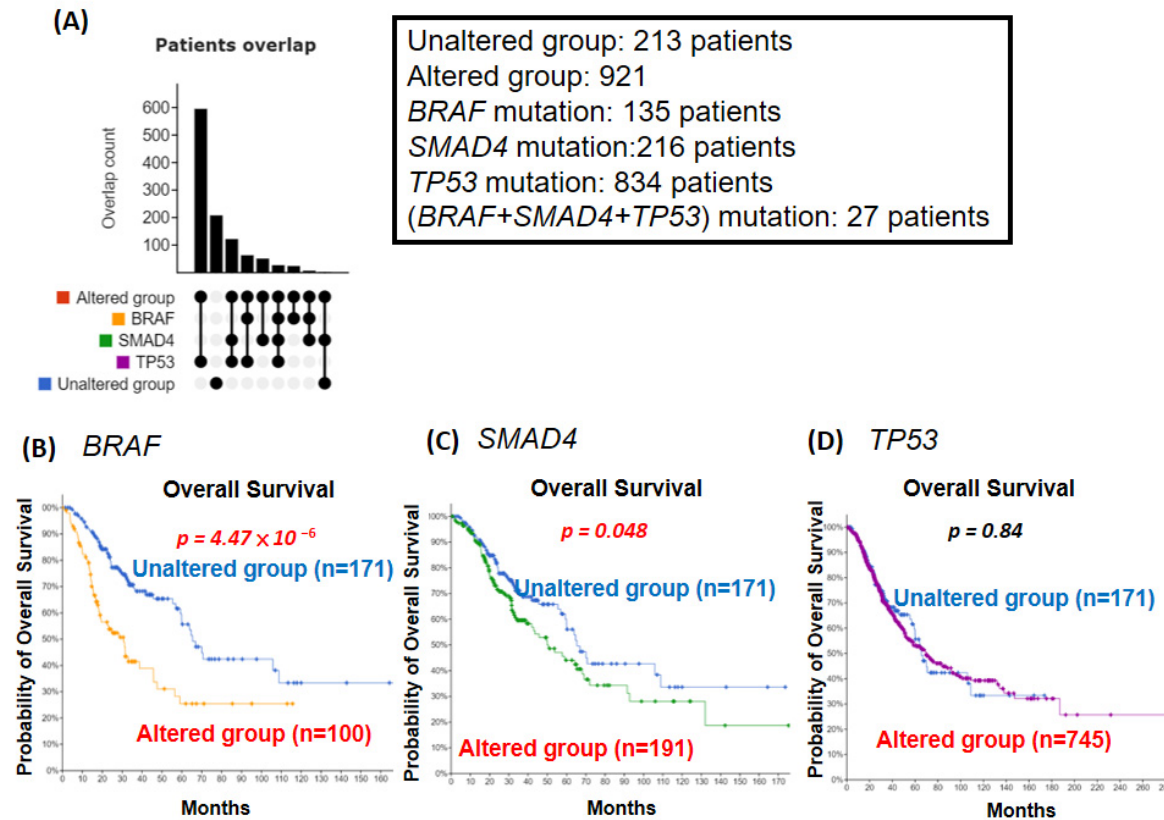

**Supplementary Figure S2.** *BRAF*, *SNAD4*, and *TP53* genetic variants as potential biomarkers for the prediction of metastatic colorectal carcinoma progression. (A) Distribution of patients with *BRAF*, *SMAD4*, and *TP53* genetic variants were shown from a metastatic colorectal cancer database. (B–D) The effects of *BRAF*, *SMAD4* and *TP53* gene mutations on OV were analyzed from a metastatic colorectal cancer database.

**Supplementary Table S1. Information and sequencing of each sample**

| Tumor Regression grade | patients | Mapped Reads | Base On Target | Mean Depth | 0.2X Coverage Uniformity | 1x coverage | 100x Coverage | 500x Coverage |
|------------------------|----------|--------------|----------------|------------|--------------------------|-------------|---------------|---------------|
| 1                      | 1A       | 1340456      | 0.943          | 5647       | 0.981                    | 1           | 1             | 0.996         |
| 1                      | 1B       | 1414280      | 0.963          | 6028       | 0.98                     | 1           | 1             | 0.992         |
| 1                      | 2A       | 1381298      | 0.96           | 6274       | 0.705                    | 1           | 0.996         | 0.947         |
| 1                      | 2B       | 1689017      | 0.979          | 7497       | 0.965                    | 1           | 1             | 0.979         |
| 0                      | 3A       | 652215       | 0.921          | 2593       | 0.892                    | 1           | 0.987         | 0.908         |
| 0                      | 3B       | 1119800      | 0.98           | 4770       | 0.969                    | 1           | 1             | 0.991         |
| 0                      | 4A       | 1522449      | 0.971          | 6649       | 0.958                    | 1           | 1             | 0.985         |
| 0                      | 4B       | 1249588      | 0.958          | 5199       | 0.963                    | 1           | 1             | 0.982         |
| 2                      | 5A       | 1596032      | 0.93           | 6676       | 0.969                    | 1           | 1             | 0.996         |
| 2                      | 5B       | 1448889      | 0.949          | 6105       | 0.958                    | 1           | 1             | 0.992         |
| 0                      | 6A       | 1540546      | 0.969          | 6664       | 0.988                    | 1           | 1             | 1             |
| 0                      | 6B       | 1608438      | 0.978          | 7075       | 0.978                    | 1           | 1             | 0.996         |
| 1                      | 7A       | 820219       | 0.983          | 3681       | 0.908                    | 1           | 1             | 0.96          |
| 1                      | 7B       | 988396       | 0.972          | 4170       | 0.941                    | 1           | 1             | 0.992         |
| 0                      | 8A       | 1190996      | 0.982          | 5120       | 0.888                    | 1           | 0.99          | 0.951         |
| 0                      | 8B       | 1285097      | 0.99           | 5728       | 0.956                    | 1           | 1             | 0.994         |
| 1                      | 9A       | 670708       | 0.791          | 2278       | 0.965                    | 1           | 1             | 0.96          |
| 1                      | 9B       | 1550568      | 0.967          | 6779       | 0.987                    | 1           | 1             | 1             |
| 2                      | 10A      | 1498237      | 0.983          | 6730       | 0.982                    | 1           | 1             | 1             |

|   |      |         |       |       |       |       |   |       |
|---|------|---------|-------|-------|-------|-------|---|-------|
| 2 | 10B  | 1436602 | 0.977 | 6304  | 0.974 | 1     | 1 | 0.987 |
| 1 | 11A  | 1398115 | 0.983 | 6078  | 0.948 | 1     | 1 | 0.986 |
| 1 | 11B  | 1536484 | 0.966 | 6675  | 0.964 | 1     | 1 | 0.986 |
| 2 | 13A  | 1446717 | 0.965 | 6300  | 0.97  | 1     | 1 | 0.992 |
| 2 | 13B  | 1570842 | 0.988 | 6890  | 0.968 | 1     | 1 | 0.999 |
| 3 | 14A  | 1512508 | 0.979 | 6603  | 0.958 | 1     | 1 | 0.999 |
| 3 | 14B  | 1518553 | 0.985 | 6667  | 0.989 | 1     | 1 | 1     |
| 2 | 15A  | 1338787 | 0.959 | 5494  | 0.901 | 1     | 1 | 0.987 |
| 2 | 15B  | 1625771 | 0.969 | 7087  | 0.969 | 1     | 1 | 0.992 |
| 0 | 17A  | 1131082 | 0.979 | 4936  | 0.903 | 1     | 1 | 0.973 |
| 0 | 17B  | 1571168 | 0.958 | 6858  | 0.967 | 1     | 1 | 0.991 |
| 3 | 18A  | 1645076 | 0.981 | 7245  | 0.954 | 1     | 1 | 1     |
| 3 | 18B  | 1594615 | 0.967 | 7042  | 0.974 | 1     | 1 | 0.992 |
| 0 | 19A  | 630664  | 0.98  | 2675  | 0.945 | 1     | 1 | 0.965 |
| 0 | 19B  | 1287038 | 0.986 | 5676  | 0.942 | 1     | 1 | 0.99  |
| 2 | 20A  | 952894  | 0.945 | 3967  | 0.958 | 1     | 1 | 0.984 |
| 2 | 20B  | 1124015 | 0.974 | 4798  | 0.965 | 1     | 1 | 0.982 |
| 0 | 21A  | 889240  | 0.982 | 3797  | 0.941 | 1     | 1 | 0.965 |
| 0 | 21B* | 24148   | 0.059 | 5.165 | 0.789 | 0.795 | 0 | 0     |
| 2 | 22A  | 1181665 | 0.958 | 4911  | 0.963 | 1     | 1 | 0.994 |
| 2 | 22B  | 1389732 | 0.981 | 6156  | 0.971 | 1     | 1 | 0.996 |
| 1 | 23A  | 1613549 | 0.981 | 7008  | 0.931 | 1     | 1 | 0.992 |

|   |      |         |       |       |       |       |       |       |
|---|------|---------|-------|-------|-------|-------|-------|-------|
| 1 | 23B  | 947871  | 0.97  | 4036  | 0.956 | 1     | 1     | 0.981 |
| 1 | 24A  | 1330671 | 0.981 | 5809  | 0.947 | 1     | 1     | 0.994 |
| 1 | 24B  | 1650992 | 0.984 | 7325  | 0.967 | 1     | 1     | 0.996 |
| 1 | 25A  | 1252719 | 0.986 | 5467  | 0.905 | 1     | 1     | 0.971 |
| 1 | 25B  | 1588493 | 0.976 | 7079  | 0.978 | 1     | 1     | 0.996 |
| 0 | 26A  | 1772005 | 0.985 | 7849  | 0.914 | 1     | 1     | 0.997 |
| 0 | 26B* | 1655    | 0.631 | 4.656 | 0.902 | 0.895 | 0     | 0     |
| 1 | 27A  | 1698283 | 0.99  | 7587  | 0.889 | 1     | 1     | 0.987 |
| 1 | 27B  | 1771937 | 0.95  | 7659  | 0.968 | 1     | 1     | 0.99  |
| 0 | 28A  | 1474727 | 0.981 | 6428  | 0.941 | 1     | 1     | 0.983 |
| 0 | 28B* | 29302   | 0.094 | 12.03 | 0.448 | 0.662 | 0.013 | 0     |
| 2 | 29A  | 1646677 | 0.986 | 7236  | 0.945 | 1     | 1     | 0.996 |
| 2 | 29B  | 1618980 | 0.978 | 6941  | 0.967 | 1     | 1     | 0.999 |
| 1 | 30A  | 1925114 | 0.984 | 8442  | 0.907 | 1     | 1     | 0.998 |
| 1 | 30B  | 1936802 | 0.973 | 8426  | 0.979 | 1     | 1     | 0.996 |
| 1 | 31A  | 674067  | 0.963 | 2801  | 0.938 | 1     | 1     | 0.958 |
| 1 | 31B  | 1616735 | 0.974 | 6917  | 0.978 | 1     | 1     | 0.992 |

**A: indicate specimens were collected by biopsy before nCRT**

**B: indicated specimens were collected by surgery after nCRT**

**\*:gnomics DNA of these sample was poor quality resulted in failed to meet QC requirements**

**Supplementary Table S2. Nonsynonymous variants of genes with more than 5% frequency identified in each library**

| Sample code | Chromosome coordinate |     |          |     |     | Variant information |            |            |             | Functional annotation |                                      |
|-------------|-----------------------|-----|----------|-----|-----|---------------------|------------|------------|-------------|-----------------------|--------------------------------------|
|             | Gene symbol           | Chr | Position | Ref | Var | Var freq            | Var counts | Ref counts | Total depth | Protein change        | consequence                          |
| 1A          | <i>FLT3</i>           | 13  | 2.9E+07  | A   | G   | 50.1%               | 1001       | 997        | 1998        | -                     | splice_region_variant,intron_variant |
| 1A          | <i>KDR</i>            | 4   | 5.6E+07  | T   | A   | 100.0%              | 1976       | 0          | 1976        | p.Q472H               | missense_variant                     |
| 1A          | <i>TP53</i>           | 17  | 7579472  | G   | C   | 49.4%               | 978        | 1001       | 1979        | p.P72R                | missense_variant                     |
| 1B          | <i>FLT3</i>           | 13  | 2.9E+07  | A   | G   | 50.8%               | 1014       | 984        | 1998        | -                     | splice_region_variant,intron_variant |
| 1B          | <i>KDR</i>            | 4   | 5.6E+07  | T   | A   | 100.0%              | 1972       | 0          | 1972        | p.Q472H               | missense_variant                     |
| 1B          | <i>TP53</i>           | 17  | 7579472  | G   | C   | 47.6%               | 950        | 1045       | 1995        | p.P72R                | missense_variant                     |
| 2A          | <i>FLT3</i>           | 13  | 2.9E+07  | A   | G   | 63.4%               | 1267       | 731        | 1998        | -                     | splice_region_variant,intron_variant |
| 2A          | <i>KDR</i>            | 4   | 5.6E+07  | T   | A   | 54.3%               | 421        | 355        | 776         | p.Q472H               | missense_variant                     |
| 2A          | <i>TP53</i>           | 17  | 7579472  | G   | C   | 83.6%               | 1623       | 319        | 1942        | p.P72R                | missense_variant                     |
| 2B          | <i>FLT3</i>           | 13  | 2.9E+07  | A   | G   | 55.1%               | 1103       | 897        | 2000        | -                     | splice_region_variant,intron_variant |
| 2B          | <i>KDR</i>            | 4   | 5.6E+07  | T   | A   | 50.4%               | 1003       | 986        | 1989        | p.Q472H               | missense_variant                     |
| 2B          | <i>TP53</i>           | 17  | 7579472  | G   | C   | 55.4%               | 1069       | 859        | 1928        | p.P72R                | missense_variant                     |
| 3A          | <i>FLT3</i>           | 13  | 2.9E+07  | A   | G   | 96.7%               | 1933       | 66         | 1999        | -                     | splice_region_variant,intron_variant |
| 3A          | <i>KDR</i>            | 4   | 5.6E+07  | T   | A   | 39.9%               | 152        | 229        | 381         | p.Q472H               | missense_variant                     |
| 3A          | <i>TP53</i>           | 17  | 7579472  | G   | C   | 93.5%               | 1455       | 101        | 1556        | p.P72R                | missense_variant                     |
| 3B          | <i>FLT3</i>           | 13  | 2.9E+07  | A   | G   | 100.0%              | 1983       | 0          | 1983        | -                     | splice_region_variant,intron_variant |
| 3B          | <i>KDR</i>            | 4   | 5.6E+07  | T   | A   | 50.6%               | 1010       | 986        | 1996        | p.Q472H               | missense_variant                     |
| 3B          | <i>TP53</i>           | 17  | 7579472  | G   | C   | 100.0%              | 1871       | 0          | 1871        | p.P72R                | missense_variant                     |

|     |               |    |         |         |   |        |      |      |      |                |                                                        |
|-----|---------------|----|---------|---------|---|--------|------|------|------|----------------|--------------------------------------------------------|
| 4A  | <i>FLT3</i>   | 13 | 2.9E+07 | A       | G | 55.5%  | 1110 | 889  | 1999 | -              | splice_region_variant,intron_variant                   |
| 4A  | <i>KDR</i>    | 4  | 5.6E+07 | T       | A | 100.0% | 1976 | 0    | 1976 | p.Q472H        | missense_variant                                       |
| 4A  | <i>TP53</i>   | 17 | 7579472 | G       | C | 38.0%  | 757  | 1233 | 1990 | p.P72R         | missense_variant                                       |
| 4B  | <i>FLT3</i>   | 13 | 2.9E+07 | A       | G | 49.6%  | 991  | 1008 | 1999 | -              | splice_region_variant,intron_variant                   |
| 4B  | <i>KDR</i>    | 4  | 5.6E+07 | T       | A | 98.9%  | 1972 | 22   | 1994 | p.Q472H        | missense_variant                                       |
| 4B  | <i>TP53</i>   | 17 | 7579472 | G       | C | 50.2%  | 1002 | 993  | 1995 | p.P72R         | missense_variant                                       |
| 5A  | <i>FLT3</i>   | 13 | 2.9E+07 | A       | G | 59.3%  | 1185 | 813  | 1998 | -              | splice_region_variant,intron_variant                   |
| 10A | <i>TP53</i>   | 17 | 7577548 | C       | T | 31.0%  | 619  | 1379 | 1998 | p.G245S        | missense_variant                                       |
| 5A  | <i>TP53</i>   | 17 | 7579472 | G       | C | 93.1%  | 1862 | 137  | 1999 | p.P72R         | missense_variant                                       |
| 5B  | <i>FLT3</i>   | 13 | 2.9E+07 | A       | G | 51.1%  | 1021 | 977  | 1998 | -              | splice_region_variant,intron_variant                   |
| 10A | <i>APC</i>    | 5  | 1.1E+08 | TC      | T | 18.4%  | 362  | 1606 | 1968 | p.P1319fs      | frameshift_variant,missense_variant,feature_truncation |
| 11A | <i>FGFR1</i>  | 8  | 3.8E+07 | GTCATCA | G | 11.4%  | 218  | 1688 | 1906 | p.D165_D166del | inframe_deletion                                       |
| 5B  | <i>TP53</i>   | 17 | 7579472 | G       | C | 93.6%  | 1869 | 127  | 1996 | p.P72R         | missense_variant                                       |
| 11A | <i>PTPN11</i> | 12 | 1.1E+08 | C       | T | 5.9%   | 119  | 1881 | 2000 | p.Q510*        | stop_gained                                            |
| 6A  | <i>FLT3</i>   | 13 | 2.9E+07 | A       | G | 100.0% | 1984 | 0    | 1984 | -              | splice_region_variant,intron_variant                   |
| 6A  | <i>KIT</i>    | 4  | 5.6E+07 | A       | C | 56.5%  | 1119 | 861  | 1980 | p.M541L        | missense_variant                                       |
| 6A  | <i>TP53</i>   | 17 | 7579472 | G       | C | 27.3%  | 544  | 1451 | 1995 | p.P72R         | missense_variant                                       |
| 13A | <i>TP53</i>   | 17 | 7578406 | C       | T | 39.5%  | 784  | 1203 | 1987 | p.R175H        | missense_variant                                       |
| 6B  | <i>FLT3</i>   | 13 | 2.9E+07 | A       | G | 100.0% | 1991 | 0    | 1991 | -              | splice_region_variant,intron_variant                   |
| 6B  | <i>KIT</i>    | 4  | 5.6E+07 | A       | C | 50.8%  | 1009 | 976  | 1985 | p.M541L        | missense_variant                                       |
| 6B  | <i>TP53</i>   | 17 | 7579472 | G       | C | 52.5%  | 1006 | 909  | 1915 | p.P72R         | missense_variant                                       |
| 7A  | <i>FLT3</i>   | 13 | 2.9E+07 | A       | G | 43.1%  | 862  | 1136 | 1998 | -              | splice_region_variant,intron_variant                   |



|     |        |    |         |    |   |       |      |      |      |           |                                                        |
|-----|--------|----|---------|----|---|-------|------|------|------|-----------|--------------------------------------------------------|
| 7A  | KDR    | 4  | 5.6E+07 | T  | A | 56.6% | 639  | 489  | 1128 | p.Q472H   | missense_variant                                       |
| 7A  | MET    | 7  | 1.2E+08 | A  | G | 34.7% | 686  | 1291 | 1977 | p.N375S   | missense_variant                                       |
| 7A  | TP53   | 17 | 7579472 | G  | C | 61.4% | 270  | 170  | 440  | p.P72R    | missense_variant                                       |
| 13A | APC    | 5  | 1.1E+08 | CT | C | 27.6% | 541  | 1416 | 1957 | p.L1488fs | frameshift_variant,missense_variant,feature_truncation |
| 13A | KRAS   | 12 | 2.5E+07 | C  | A | 22.1% | 418  | 1472 | 1890 | p.G12V    | missense_variant                                       |
| 14A | TP53   | 17 | 7577539 | G  | A | 59.8% | 1193 | 802  | 1995 | p.R248W   | missense_variant                                       |
| 14A | APC    | 5  | 1.1E+08 | C  | T | 40.7% | 811  | 1184 | 1995 | p.Q1367*  | stop_gained                                            |
| 15A | TP53   | 17 | 7578413 | C  | T | 76.5% | 861  | 239  | 1125 | p.V173M   | missense_variant                                       |
| 15A | KRAS   | 12 | 2.5E+07 | C  | A | 44.9% | 839  | 1029 | 1868 | p.G12V    | missense_variant                                       |
| 15A | RET    | 10 | 4.4E+07 | C  | T | 5.2%  | 34   | 624  | 658  | p.R635C   | missense_variant                                       |
| 3A  | PTPN11 | 12 | 1.1E+08 | G  | A | 6.2%  | 91   | 1374 | 1465 | p.R501K   | missense_variant                                       |
| 7B  | FLT3   | 13 | 2.9E+07 | A  | G | 54.9% | 1099 | 901  | 2000 | -         | splice_region_variant,intron_variant                   |
| 7B  | KDR    | 4  | 5.6E+07 | T  | A | 44.8% | 347  | 428  | 775  | p.Q472H   | missense_variant                                       |
| 7B  | MET    | 7  | 1.2E+08 | A  | G | 48.8% | 964  | 1012 | 1976 | p.N375S   | missense_variant                                       |
| 17A | TP53   | 17 | 7577556 | C  | T | 28.9% | 569  | 1402 | 1971 | p.C242Y   | missense_variant                                       |
| 3A  | KDR    | 4  | 5.6E+07 | G  | A | 5.4%  | 33   | 575  | 608  | -         | splice_region_variant,intron_variant                   |
| 18A | TP53   | 17 | 7578413 | C  | T | 26.4% | 523  | 1459 | 1982 | p.V173M   | missense_variant                                       |
| 18A | APC    | 5  | 1.1E+08 | G  | T | 19.2% | 384  | 1612 | 1996 | p.E1353*  | stop_gained                                            |
| 18A | APC    | 5  | 1.1E+08 | G  | T | 15.8% | 295  | 1576 | 1871 | p.E1309*  | stop_gained                                            |
| 18B | TP53   | 17 | 7578413 | C  | T | 7.0%  | 139  | 1848 | 1987 | p.V173M   | missense_variant                                       |
| 18B | APC    | 5  | 1.1E+08 | G  | T | 6.4%  | 127  | 1864 | 1991 | p.E1353*  | stop_gained                                            |
| 18B | SMAD4  | 18 | 4.9E+07 | C  | T | 6.1%  | 122  | 1876 | 1998 | p.A118V   | missense_variant                                       |

|     |       |    |         |   |    |        |      |      |      |            |                                       |
|-----|-------|----|---------|---|----|--------|------|------|------|------------|---------------------------------------|
| 18B | APC   | 5  | 1.1E+08 | G | T  | 5.8%   | 109  | 1785 | 1894 | p.E1309*   | stop_gained                           |
| 7B  | TP53  | 17 | 7579472 | G | C  | 62.7%  | 897  | 533  | 1430 | p.P72R     | missense_variant                      |
| 8A  | STK11 | 19 | 1223125 | C | G  | 44.6%  | 891  | 1106 | 1997 | p.F354L    | missense_variant                      |
| 19A | TP53  | 17 | 7577580 | T | C  | 38.8%  | 759  | 1197 | 1956 | p.Y234C    | missense_variant                      |
| 8A  | TP53  | 17 | 7579472 | G | C  | 94.3%  | 1660 | 101  | 1761 | p.P72R     | missense_variant                      |
| 8B  | STK11 | 19 | 1223125 | C | G  | 47.5%  | 945  | 1045 | 1990 | p.F354L    | missense_variant                      |
| 19A | APC   | 5  | 1.1E+08 | C | G  | 27.4%  | 548  | 1449 | 1997 | p.S1356*   | stop_gained                           |
| 19A | TP53  | 17 | 7578271 | T | C  | 8.1%   | 161  | 1835 | 1996 | p.H193R    | missense_variant                      |
| 8B  | TP53  | 17 | 7579472 | G | C  | 100.0% | 1956 | 0    | 1956 | p.P72R     | missense_variant                      |
| 9A  | FLT3  | 13 | 2.9E+07 | A | G  | 72.5%  | 1449 | 551  | 2000 | -          | splice_region_variant,intron_variant  |
| 9A  | KDR   | 4  | 5.6E+07 | T | A  | 70.1%  | 559  | 239  | 798  | p.Q472H    | missense_variant                      |
| 19A | FGFR3 | 4  | 1808901 | C | T  | 5.5%   | 44   | 750  | 794  | p.P778L    | missense_variant                      |
| 9A  | STK11 | 19 | 1223125 | C | G  | 67.1%  | 638  | 313  | 951  | p.F354L    | missense_variant                      |
| 1A  | SMAD4 | 18 | 4.9E+07 | G | A  | 6.9%   | 138  | 1858 | 1996 | p.C127Y    | missense_variant                      |
| 20A | TP53  | 17 | 7578212 | G | GA | 11.2%  | 219  | 1728 | 1947 | p.R213fs   | frameshift_variant,feature_elongation |
| 9A  | TP53  | 17 | 7579472 | G | C  | 71.8%  | 657  | 258  | 915  | p.P72R     | missense_variant                      |
| 9B  | FLT3  | 13 | 2.9E+07 | A | G  | 100.0% | 1990 | 0    | 1990 | -          | splice_region_variant,intron_variant  |
| 20B | TP53  | 17 | 7578212 | G | GA | 5.1%   | 98   | 1830 | 1928 | p.R213fs   | frameshift_variant,feature_elongation |
| 21A | TP53  | 17 | 7578370 | C | A  | 12.2%  | 245  | 1755 | 2000 | p.?_splice | splice_donor_variant                  |
| 21A | APC   | 5  | 1.1E+08 | G | T  | 7.8%   | 156  | 1840 | 1996 | p.E1513*   | stop_gained                           |
| 9B  | KDR   | 4  | 5.6E+07 | T | A  | 98.9%  | 1970 | 21   | 1991 | p.Q472H    | missense_variant                      |
| 9B  | STK11 | 19 | 1223125 | C | G  | 39.1%  | 778  | 1212 | 1990 | p.F354L    | missense_variant                      |

|     |             |    |         |   |    |        |      |      |      |           |                                       |
|-----|-------------|----|---------|---|----|--------|------|------|------|-----------|---------------------------------------|
| 9B  | <i>TP53</i> | 17 | 7579472 | G | C  | 50.2%  | 1000 | 994  | 1994 | p.P72R    | missense_variant                      |
| 22A | <i>TP53</i> | 17 | 7578406 | C | T  | 24.6%  | 490  | 1501 | 1991 | p.R175H   | missense_variant                      |
| 10A | <i>FLT3</i> | 13 | 2.9E+07 | A | G  | 47.4%  | 947  | 1052 | 1999 | -         | splice_region_variant,intron_variant  |
| 23A | <i>APC</i>  | 5  | 1.1E+08 | C | CA | 38.3%  | 757  | 1221 | 1978 | p.M1383fs | frameshift_variant,feature_elongation |
| 10A | <i>KDR</i>  | 4  | 5.6E+07 | T | A  | 49.4%  | 984  | 1009 | 1993 | p.Q472H   | missense_variant                      |
| 23A | <i>TP53</i> | 17 | 7577570 | C | T  | 37.6%  | 752  | 1246 | 1998 | p.M237I   | missense_variant                      |
| 10A | <i>MLH1</i> | 3  | 3.7E+07 | T | A  | 54.5%  | 1084 | 905  | 1989 | p.V384D   | missense_variant                      |
| 23A | <i>KRAS</i> | 12 | 2.5E+07 | C | T  | 21.7%  | 432  | 1563 | 1995 | p.A146T   | missense_variant                      |
| 23B | <i>TP53</i> | 17 | 7577570 | C | T  | 6.9%   | 137  | 1862 | 1999 | p.M237I   | missense_variant                      |
| 23B | <i>KRAS</i> | 12 | 2.5E+07 | C | T  | 5.1%   | 75   | 1387 | 1462 | p.A146T   | missense_variant                      |
| 10A | <i>TP53</i> | 17 | 7579472 | G | C  | 70.6%  | 1343 | 558  | 1901 | p.P72R    | missense_variant                      |
| 10B | <i>FLT3</i> | 13 | 2.9E+07 | A | G  | 53.8%  | 1076 | 923  | 1999 | -         | splice_region_variant,intron_variant  |
| 10B | <i>KDR</i>  | 4  | 5.6E+07 | T | A  | 45.7%  | 909  | 1079 | 1988 | p.Q472H   | missense_variant                      |
| 10B | <i>MLH1</i> | 3  | 3.7E+07 | T | A  | 47.0%  | 936  | 1054 | 1990 | p.V384D   | missense_variant                      |
| 10B | <i>TP53</i> | 17 | 7579472 | G | C  | 54.6%  | 1032 | 858  | 1890 | p.P72R    | missense_variant                      |
| 11A | <i>FLT3</i> | 13 | 2.9E+07 | A | G  | 100.0% | 1986 | 0    | 1986 | -         | splice_region_variant,intron_variant  |
| 11A | <i>KDR</i>  | 4  | 5.6E+07 | T | A  | 51.2%  | 1020 | 974  | 1994 | p.Q472H   | missense_variant                      |
| 24A | <i>FLT3</i> | 13 | 2.9E+07 | T | C  | 49.3%  | 986  | 1013 | 1999 | p.Y572C   | missense_variant                      |
| 11A | <i>TP53</i> | 17 | 7579472 | G | C  | 54.7%  | 1051 | 869  | 1920 | p.P72R    | missense_variant                      |
| 11B | <i>FLT3</i> | 13 | 2.9E+07 | A | G  | 100.0% | 1989 | 0    | 1989 | -         | splice_region_variant,intron_variant  |
| 24A | <i>MET</i>  | 7  | 1.2E+08 | G | A  | 23.8%  | 474  | 1520 | 1994 | p.D372N   | missense_variant                      |
| 11B | <i>KDR</i>  | 4  | 5.6E+07 | T | A  | 48.6%  | 967  | 1023 | 1990 | p.Q472H   | missense_variant                      |

|     |              |    |         |   |   |        |      |      |      |         |                                      |
|-----|--------------|----|---------|---|---|--------|------|------|------|---------|--------------------------------------|
| 24A | <i>ERBB4</i> | 2  | 2.1E+08 | C | A | 17.6%  | 351  | 1638 | 1989 | p.G340* | stop_gained                          |
| 11B | <i>TP53</i>  | 17 | 7579472 | G | C | 53.6%  | 1025 | 889  | 1914 | p.P72R  | missense_variant                     |
| 13A | <i>FLT3</i>  | 13 | 2.9E+07 | A | G | 100.0% | 1989 | 0    | 1989 | -       | splice_region_variant,intron_variant |
| 13B | <i>FLT3</i>  | 13 | 2.9E+07 | A | G | 100.0% | 1980 | 0    | 1980 | -       | splice_region_variant,intron_variant |
| 24A | <i>ATM</i>   | 11 | 1.1E+08 | T | C | 14.8%  | 296  | 1701 | 1997 | p.V341A | missense_variant                     |
| 14A | <i>FLT3</i>  | 13 | 2.9E+07 | A | G | 54.3%  | 1085 | 913  | 1998 | -       | splice_region_variant,intron_variant |
| 24A | <i>PTEN</i>  | 10 | 9E+07   | G | T | 10.5%  | 209  | 1773 | 1982 | p.E299* | stop_gained                          |
| 14A | <i>KDR</i>   | 4  | 5.6E+07 | T | A | 33.7%  | 673  | 1323 | 1996 | p.Q472H | missense_variant                     |
| 14A | <i>TP53</i>  | 17 | 7579472 | G | C | 81.5%  | 1546 | 351  | 1897 | p.P72R  | missense_variant                     |
| 24A | <i>TP53</i>  | 17 | 7579358 | C | G | 6.7%   | 97   | 1343 | 1440 | p.R110P | missense_variant                     |
| 24B | <i>FLT3</i>  | 13 | 2.9E+07 | T | C | 48.5%  | 969  | 1028 | 1997 | p.Y572C | missense_variant                     |
| 14B | <i>FLT3</i>  | 13 | 2.9E+07 | A | G | 50.7%  | 1014 | 985  | 1999 | -       | splice_region_variant,intron_variant |
| 25A | <i>TP53</i>  | 17 | 7574003 | G | A | 39.7%  | 793  | 1206 | 1999 | p.R342* | stop_gained                          |
| 25A | <i>BRAF</i>  | 7  | 1.4E+08 | A | T | 15.4%  | 289  | 1586 | 1875 | p.V600E | missense_variant                     |
| 25B | <i>TP53</i>  | 17 | 7574003 | G | A | 22.7%  | 453  | 1546 | 1999 | p.R342* | stop_gained                          |
| 14B | <i>KDR</i>   | 4  | 5.6E+07 | T | A | 46.7%  | 929  | 1059 | 1988 | p.Q472H | missense_variant                     |
| 25B | <i>BRAF</i>  | 7  | 1.4E+08 | A | T | 11.4%  | 217  | 1690 | 1907 | p.V600E | missense_variant                     |
| 14B | <i>TP53</i>  | 17 | 7579472 | G | C | 57.3%  | 1098 | 819  | 1917 | p.P72R  | missense_variant                     |
| 15A | <i>FLT3</i>  | 13 | 2.9E+07 | A | G | 100.0% | 1981 | 0    | 1981 | -       | splice_region_variant,intron_variant |
| 26A | <i>TP53</i>  | 17 | 7577559 | G | A | 40.0%  | 791  | 1188 | 1979 | p.S241F | missense_variant                     |
| 26A | <i>KRAS</i>  | 12 | 2.5E+07 | T | A | 17.8%  | 352  | 1625 | 1977 | p.Q61L  | missense_variant                     |
| 27A | <i>KIT</i>   | 4  | 5.6E+07 | A | T | 51.2%  | 1017 | 969  | 1986 | p.M651L | missense_variant                     |

|     |       |    |         |    |   |        |      |      |      |           |                                                        |
|-----|-------|----|---------|----|---|--------|------|------|------|-----------|--------------------------------------------------------|
| 15A | KDR   | 4  | 5.6E+07 | T  | A | 98.8%  | 1971 | 23   | 1994 | p.Q472H   | missense_variant                                       |
| 15A | TP53  | 17 | 7579472 | G  | C | 17.5%  | 134  | 633  | 767  | p.P72R    | missense_variant                                       |
| 15B | FLT3  | 13 | 2.9E+07 | A  | G | 100.0% | 1985 | 0    | 1985 | -         | splice_region_variant,intron_variant                   |
| 27A | APC   | 5  | 1.1E+08 | G  | T | 23.3%  | 466  | 1530 | 1996 | p.E1322*  | stop_gained                                            |
| 15B | KDR   | 4  | 5.6E+07 | T  | A | 100.0% | 1984 | 0    | 1984 | p.Q472H   | missense_variant                                       |
| 15B | TP53  | 17 | 7579472 | G  | C | 50.4%  | 982  | 968  | 1950 | p.P72R    | missense_variant                                       |
| 27A | TP53  | 17 | 7578460 | A  | T | 22.5%  | 449  | 1543 | 1992 | p.V157D   | missense_variant                                       |
| 27A | KRAS  | 12 | 2.5E+07 | C  | A | 13.7%  | 264  | 1669 | 1933 | p.G12V    | missense_variant                                       |
| 27B | KIT   | 4  | 5.6E+07 | A  | T | 50.4%  | 1003 | 986  | 1989 | p.M651L   | missense_variant                                       |
| 28A | MET   | 7  | 1.2E+08 | G  | A | 49.8%  | 986  | 992  | 1978 | p.M840I   | missense_variant                                       |
| 17A | FLT3  | 13 | 2.9E+07 | A  | G | 99.0%  | 1979 | 19   | 1998 | -         | splice_region_variant,intron_variant                   |
| 17A | KDR   | 4  | 5.6E+07 | T  | A | 58.3%  | 1162 | 831  | 1993 | p.Q472H   | missense_variant                                       |
| 28A | KRAS  | 12 | 2.5E+07 | C  | T | 18.3%  | 345  | 1541 | 1886 | p.G12S    | missense_variant                                       |
| 29A | TP53  | 17 | 7579377 | G  | A | 23.6%  | 449  | 1452 | 1901 | p.Q104*   | stop_gained                                            |
| 17A | MLH1  | 3  | 3.7E+07 | T  | A | 51.8%  | 1033 | 962  | 1995 | p.V384D   | missense_variant                                       |
| 29A | FBXW7 | 4  | 1.5E+08 | G  | A | 12.1%  | 242  | 1756 | 1998 | p.R505C   | missense_variant                                       |
| 17A | TP53  | 17 | 7579472 | G  | C | 66.5%  | 731  | 369  | 1100 | p.P72R    | missense_variant                                       |
| 17B | FLT3  | 13 | 2.9E+07 | A  | G | 100.0% | 1994 | 0    | 1994 | -         | splice_region_variant,intron_variant                   |
| 17B | KDR   | 4  | 5.6E+07 | T  | A | 47.9%  | 953  | 1037 | 1990 | p.Q472H   | missense_variant                                       |
| 29A | APC   | 5  | 1.1E+08 | CT | C | 10.3%  | 201  | 1750 | 1951 | p.L1488fs | frameshift_variant,missense_variant,feature_truncation |
| 17B | MLH1  | 3  | 3.7E+07 | T  | A | 49.8%  | 991  | 998  | 1989 | p.V384D   | missense_variant                                       |
| 17B | TP53  | 17 | 7579472 | G  | C | 50.8%  | 996  | 966  | 1962 | p.P72R    | missense_variant                                       |

|     |       |    |         |    |   |        |      |      |      |           |                                                        |
|-----|-------|----|---------|----|---|--------|------|------|------|-----------|--------------------------------------------------------|
| 29A | APC   | 5  | 1.1E+08 | C  | T | 7.0%   | 139  | 1858 | 1997 | p.R876*   | stop_gained                                            |
| 29B | TP53  | 17 | 7579377 | G  | A | 12.0%  | 235  | 1729 | 1964 | p.Q104*   | stop_gained                                            |
| 29B | FBXW7 | 4  | 1.5E+08 | G  | A | 9.6%   | 191  | 1807 | 1998 | p.R505C   | missense_variant                                       |
| 18A | FLT3  | 13 | 2.9E+07 | A  | G | 100.0% | 1992 | 0    | 1992 | -         | splice_region_variant,intron_variant                   |
| 29B | APC   | 5  | 1.1E+08 | CT | C | 7.9%   | 154  | 1801 | 1955 | p.L1488fs | frameshift_variant,missense_variant,feature_truncation |
| 2A  | TP53  | 17 | 7577120 | C  | T | 60.0%  | 1200 | 799  | 1999 | p.R273H   | missense_variant                                       |
| 18A | KDR   | 4  | 5.6E+07 | T  | A | 50.1%  | 999  | 996  | 1995 | p.Q472H   | missense_variant                                       |
| 2A  | PTEN  | 10 | 9E+07   | C  | T | 5.7%   | 78   | 1284 | 1362 | p.R233*   | stop_gained                                            |
| 18A | MET   | 7  | 1.2E+08 | A  | G | 43.4%  | 858  | 1118 | 1976 | p.N375S   | missense_variant                                       |
| 18A | TP53  | 17 | 7579472 | G  | C | 37.8%  | 559  | 921  | 1480 | p.P72R    | missense_variant                                       |
| 18B | FLT3  | 13 | 2.9E+07 | A  | G | 100.0% | 1996 | 0    | 1996 | -         | splice_region_variant,intron_variant                   |
| 2A  | PTEN  | 10 | 9E+07   | C  | T | 5.4%   | 31   | 546  | 577  | p.P169L   | missense_variant                                       |
| 18B | KDR   | 4  | 5.6E+07 | T  | A | 51.5%  | 1026 | 966  | 1992 | p.Q472H   | missense_variant                                       |
| 18B | MET   | 7  | 1.2E+08 | A  | G | 47.2%  | 931  | 1040 | 1971 | p.N375S   | missense_variant                                       |
| 18B | TP53  | 17 | 7579472 | G  | C | 49.5%  | 963  | 981  | 1944 | p.P72R    | missense_variant                                       |
| 2A  | APC   | 5  | 1.1E+08 | G  | A | 5.2%   | 26   | 470  | 496  | p.E1317K  | missense_variant                                       |
| 30A | ALK   | 2  | 2.9E+07 | C  | T | 38.1%  | 756  | 1229 | 1985 | p.G1202E  | missense_variant                                       |
| 19A | FLT3  | 13 | 2.9E+07 | A  | G | 51.3%  | 1024 | 973  | 1997 | -         | splice_region_variant,intron_variant                   |
| 30A | TP53  | 17 | 7577124 | C  | T | 26.8%  | 535  | 1461 | 1996 | p.V272M   | missense_variant                                       |
| 19A | KDR   | 4  | 5.6E+07 | T  | A | 53.5%  | 650  | 566  | 1216 | p.Q472H   | missense_variant                                       |
| 19A | TP53  | 17 | 7579472 | G  | C | 91.5%  | 923  | 86   | 1009 | p.P72R    | missense_variant                                       |
| 19B | FLT3  | 13 | 2.9E+07 | A  | G | 52.2%  | 1042 | 956  | 1998 | -         | splice_region_variant,intron_variant                   |

|     |        |    |         |   |   |        |      |      |      |          |                                        |
|-----|--------|----|---------|---|---|--------|------|------|------|----------|----------------------------------------|
| 19B | KDR    | 4  | 5.6E+07 | T | A | 49.0%  | 976  | 1017 | 1993 | p.Q472H  | missense_variant                       |
| 19B | TP53   | 17 | 7579472 | G | C | 100.0% | 1814 | 0    | 1814 | p.P72R   | missense_variant                       |
| 20A | FLT3   | 13 | 2.9E+07 | A | G | 100.0% | 1991 | 0    | 1991 | -        | splice_region_variant,intron_variant   |
| 30A | APC    | 5  | 1.1E+08 | G | T | 9.4%   | 180  | 1740 | 1920 | p.E1306* | stop_gained                            |
| 20A | KDR    | 4  | 5.6E+07 | T | A | 43.9%  | 876  | 1120 | 1996 | p.Q472H  | missense_variant                       |
| 30A | APC    | 5  | 1.1E+08 | C | T | 9.1%   | 181  | 1818 | 1999 | p.R876*  | stop_gained                            |
| 30B | ALK    | 2  | 2.9E+07 | C | T | 40.2%  | 800  | 1190 | 1990 | p.G1202E | missense_variant                       |
| 20A | TP53   | 17 | 7579472 | G | C | 100.0% | 1482 | 0    | 1482 | p.P72R   | missense_variant                       |
| 20B | FLT3   | 13 | 2.9E+07 | A | G | 100.0% | 1980 | 0    | 1980 | -        | splice_region_variant,intron_variant   |
| 31A | TP53   | 17 | 7578190 | T | C | 11.4%  | 228  | 1767 | 1995 | p.Y220C  | missense_variant                       |
| 20B | KDR    | 4  | 5.6E+07 | T | A | 49.0%  | 978  | 1018 | 1996 | p.Q472H  | missense_variant                       |
| 31A | KRAS   | 12 | 2.5E+07 | C | T | 7.3%   | 48   | 614  | 662  | p.A146T  | missense_variant                       |
| 20B | TP53   | 17 | 7579472 | G | C | 100.0% | 1939 | 0    | 1939 | p.P72R   | missense_variant                       |
| 21A | FLT3   | 13 | 2.9E+07 | A | G | 61.1%  | 1222 | 777  | 1999 | -        | splice_region_variant,intron_variant   |
| 31A | CDKN2A | 9  | 2.2E+07 | C | T | 6.4%   | 35   | 502  | 546  | p.G136D  | missense_variant                       |
| 31A | KRAS   | 12 | 2.5E+07 | C | T | 6.2%   | 41   | 615  | 656  | p.R149K  | missense_variant                       |
| 31A | ATM    | 11 | 1.1E+08 | G | A | 5.3%   | 25   | 445  | 470  | p.G327R  | missense_variant                       |
| 21A | KDR    | 4  | 5.6E+07 | T | A | 50.2%  | 1000 | 994  | 1994 | p.Q472H  | missense_variant                       |
| 31A | TP53   | 17 | 7579478 | G | A | 5.3%   | 83   | 1470 | 1553 | p.A70V   | missense_variant                       |
| 31A | FBXW7  | 4  | 1.5E+08 | C | T | 5.3%   | 28   | 497  | 525  | p.E287K  | missense_variant,splice_region_variant |
| 21A | MET    | 7  | 1.2E+08 | A | G | 6.1%   | 121  | 1871 | 1992 | p.N375S  | missense_variant                       |
| 31A | FLT3   | 13 | 2.9E+07 | C | T | 5.0%   | 36   | 690  | 726  | p.S574N  | missense_variant                       |

|     |              |    |         |   |   |        |      |      |      |            |                                      |
|-----|--------------|----|---------|---|---|--------|------|------|------|------------|--------------------------------------|
| 3A  | <i>TP53</i>  | 17 | 7578212 | G | A | 18.3%  | 353  | 1579 | 1932 | p.R213*    | stop_gained                          |
| 3A  | <i>FBXW7</i> | 4  | 1.5E+08 | G | A | 8.1%   | 33   | 372  | 405  | p.S282L    | missense_variant                     |
| 21A | <i>MLH1</i>  | 3  | 3.7E+07 | T | A | 42.3%  | 842  | 1147 | 1989 | p.V384D    | missense_variant                     |
| 21A | <i>TP53</i>  | 17 | 7579472 | G | C | 43.1%  | 562  | 742  | 1304 | p.P72R     | missense_variant                     |
| 3A  | <i>ERBB4</i> | 2  | 2.1E+08 | G | A | 7.6%   | 36   | 435  | 471  | -          | splice_region_variant,intron_variant |
| 22A | <i>FLT3</i>  | 13 | 2.9E+07 | A | G | 38.4%  | 767  | 1232 | 1999 | -          | splice_region_variant,intron_variant |
| 22A | <i>KDR</i>   | 4  | 5.6E+07 | T | A | 57.8%  | 1006 | 735  | 1741 | p.Q472H    | missense_variant                     |
| 3A  | <i>FBXW7</i> | 4  | 1.5E+08 | C | T | 7.2%   | 29   | 375  | 404  | p.?_splice | splice_donor_variant                 |
| 22A | <i>TP53</i>  | 17 | 7579472 | G | C | 100.0% | 1433 | 0    | 1433 | p.P72R     | missense_variant                     |
| 22B | <i>FLT3</i>  | 13 | 2.9E+07 | A | G | 52.7%  | 1055 | 945  | 2000 | -          | splice_region_variant,intron_variant |
| 22B | <i>KDR</i>   | 4  | 5.6E+07 | T | A | 50.2%  | 1000 | 993  | 1993 | p.Q472H    | missense_variant                     |
| 22B | <i>TP53</i>  | 17 | 7579472 | G | C | 90.0%  | 1798 | 199  | 1997 | p.P72R     | missense_variant                     |
| 23A | <i>FLT3</i>  | 13 | 2.9E+07 | A | G | 67.9%  | 1359 | 641  | 2000 | -          | splice_region_variant,intron_variant |
| 23A | <i>KDR</i>   | 4  | 5.6E+07 | T | A | 36.7%  | 730  | 1260 | 1990 | p.Q472H    | missense_variant                     |
| 3A  | <i>FBXW7</i> | 4  | 1.5E+08 | G | A | 6.9%   | 28   | 375  | 403  | p.P274L    | missense_variant                     |
| 23A | <i>TP53</i>  | 17 | 7579472 | G | C | 100.0% | 1094 | 0    | 1094 | p.P72R     | missense_variant                     |
| 3A  | <i>SMAD4</i> | 18 | 4.9E+07 | C | T | 6.6%   | 78   | 1100 | 1178 | p.P318S    | missense_variant                     |
| 23B | <i>FLT3</i>  | 13 | 2.9E+07 | A | G | 51.9%  | 1036 | 959  | 1995 | -          | splice_region_variant,intron_variant |
| 23B | <i>KDR</i>   | 4  | 5.6E+07 | T | A | 48.2%  | 962  | 1033 | 1995 | p.Q472H    | missense_variant                     |
| 23B | <i>TP53</i>  | 17 | 7579472 | G | C | 84.7%  | 1687 | 305  | 1992 | p.P72R     | missense_variant                     |
| 24A | <i>FLT3</i>  | 13 | 2.9E+07 | A | G | 100.0% | 1989 | 0    | 1989 | -          | splice_region_variant,intron_variant |
| 24A | <i>KDR</i>   | 4  | 5.6E+07 | T | A | 51.5%  | 1027 | 969  | 1996 | p.Q472H    | missense_variant                     |



|     |               |    |         |   |   |        |      |      |      |            |                                        |
|-----|---------------|----|---------|---|---|--------|------|------|------|------------|----------------------------------------|
| 24A | <i>TP53</i>   | 17 | 7579472 | G | C | 100.0% | 1873 | 0    | 1873 | p.P72R     | missense_variant                       |
| 3A  | <i>KDR</i>    | 4  | 5.6E+07 | C | T | 6.6%   | 40   | 569  | 609  | -          | splice_region_variant,intron_variant   |
| 3A  | <i>CTNNB1</i> | 3  | 4.1E+07 | C | T | 6.3%   | 60   | 891  | 951  | p.P44L     | missense_variant                       |
| 24B | <i>FLT3</i>   | 13 | 2.9E+07 | A | G | 100.0% | 1991 | 0    | 1991 | -          | splice_region_variant,intron_variant   |
| 3A  | <i>ERBB4</i>  | 2  | 2.1E+08 | C | T | 6.2%   | 77   | 1172 | 1249 | p.G596D    | missense_variant                       |
| 24B | <i>KDR</i>    | 4  | 5.6E+07 | T | A | 51.4%  | 1024 | 970  | 1994 | p.Q472H    | missense_variant                       |
| 3A  | <i>ERBB4</i>  | 2  | 2.1E+08 | C | T | 6.1%   | 76   | 1161 | 1237 | p.C617Y    | missense_variant                       |
| 3A  | <i>ERBB4</i>  | 2  | 2.1E+08 | C | T | 6.0%   | 74   | 1166 | 1240 | p.G586S    | missense_variant                       |
| 24B | <i>TP53</i>   | 17 | 7579472 | G | C | 100.0% | 1971 | 0    | 1971 | p.P72R     | missense_variant                       |
| 25A | <i>KDR</i>    | 4  | 5.6E+07 | T | A | 100.0% | 1980 | 0    | 1980 | p.Q472H    | missense_variant                       |
| 3A  | <i>KRAS</i>   | 12 | 2.5E+07 | C | T | 6.0%   | 56   | 878  | 934  | p.D30N     | missense_variant                       |
| 3A  | <i>MET</i>    | 7  | 1.2E+08 | C | T | 5.9%   | 33   | 524  | 557  | p.P822S    | missense_variant                       |
| 25A | <i>TP53</i>   | 17 | 7579472 | G | C | 71.7%  | 787  | 310  | 1097 | p.P72R     | missense_variant                       |
| 25B | <i>KDR</i>    | 4  | 5.6E+07 | T | A | 100.0% | 1977 | 0    | 1977 | p.Q472H    | missense_variant                       |
| 25B | <i>TP53</i>   | 17 | 7579472 | G | C | 63.6%  | 1235 | 707  | 1942 | p.P72R     | missense_variant                       |
| 3A  | <i>ERBB4</i>  | 2  | 2.1E+08 | G | A | 5.8%   | 43   | 696  | 739  | p.T360I    | missense_variant                       |
| 3A  | <i>PTPN11</i> | 12 | 1.1E+08 | G | A | 5.8%   | 59   | 953  | 1012 | p.?_splice | splice_acceptor_variant                |
| 3A  | <i>PIK3CA</i> | 3  | 1.8E+08 | G | A | 5.8%   | 33   | 533  | 566  | p.G320R    | missense_variant                       |
| 26A | <i>FLT3</i>   | 13 | 2.9E+07 | A | G | 100.0% | 1988 | 0    | 1988 | -          | splice_region_variant,intron_variant   |
| 3A  | <i>PTEN</i>   | 10 | 9E+07   | C | T | 5.5%   | 70   | 1206 | 1276 | p.P246S    | missense_variant                       |
| 3A  | <i>SMAD4</i>  | 18 | 4.9E+07 | C | T | 5.3%   | 62   | 1116 | 1178 | p.P318L    | missense_variant,splice_region_variant |
| 26A | <i>TP53</i>   | 17 | 7579472 | G | C | 92.8%  | 1627 | 126  | 1753 | p.P72R     | missense_variant                       |

|     |               |    |         |   |   |        |      |      |      |          |                                        |
|-----|---------------|----|---------|---|---|--------|------|------|------|----------|----------------------------------------|
| 3A  | <i>ERBB4</i>  | 2  | 2.1E+08 | C | T | 5.2%   | 25   | 460  | 485  | p.E314K  | missense_variant                       |
| 27A | <i>FLT3</i>   | 13 | 2.9E+07 | A | G | 54.3%  | 1083 | 912  | 1995 | -        | splice_region_variant,intron_variant   |
| 3A  | <i>ERBB4</i>  | 2  | 2.1E+08 | C | T | 5.2%   | 25   | 460  | 485  | p.C304Y  | missense_variant                       |
| 27A | <i>KDR</i>    | 4  | 5.6E+07 | T | A | 51.5%  | 1020 | 962  | 1982 | p.Q472H  | missense_variant                       |
| 3A  | <i>GNAQ</i>   | 9  | 8E+07   | C | T | 5.2%   | 66   | 1205 | 1271 | p.E245K  | missense_variant,splice_region_variant |
| 3A  | <i>PIK3CA</i> | 3  | 1.8E+08 | G | A | 5.2%   | 35   | 633  | 668  | p.D717N  | missense_variant                       |
| 3A  | <i>EGFR</i>   | 7  | 5.5E+07 | G | A | 5.2%   | 70   | 1272 | 1342 | p.R748K  | missense_variant                       |
| 3A  | <i>CDKN2A</i> | 9  | 2.2E+07 | C | T | 5.1%   | 64   | 1195 | 1259 | p.D108N  | missense_variant                       |
| 3A  | <i>PIK3CA</i> | 3  | 1.8E+08 | C | T | 5.1%   | 27   | 498  | 525  | p.T462I  | missense_variant                       |
| 27B | <i>FLT3</i>   | 13 | 2.9E+07 | A | G | 50.1%  | 1002 | 997  | 1999 | -        | splice_region_variant,intron_variant   |
| 3A  | <i>KDR</i>    | 4  | 5.6E+07 | C | T | 5.1%   | 33   | 619  | 652  | p.E1325K | missense_variant                       |
| 27B | <i>KDR</i>    | 4  | 5.6E+07 | T | A | 51.5%  | 1025 | 967  | 1992 | p.Q472H  | missense_variant                       |
| 3A  | <i>FLT3</i>   | 13 | 2.9E+07 | C | A | 5.0%   | 42   | 806  | 848  | p.G583V  | missense_variant                       |
| 28A | <i>FLT3</i>   | 13 | 2.9E+07 | A | G | 55.0%  | 1098 | 898  | 1996 | -        | splice_region_variant,intron_variant   |
| 3A  | <i>SMAD4</i>  | 18 | 4.9E+07 | G | A | 5.0%   | 57   | 1079 | 1136 | p.D120N  | missense_variant                       |
| 4A  | <i>TP53</i>   | 17 | 7578406 | C | T | 32.0%  | 635  | 1349 | 1984 | p.R175H  | missense_variant                       |
| 28A | <i>KDR</i>    | 4  | 5.6E+07 | T | A | 50.4%  | 1005 | 990  | 1995 | p.Q472H  | missense_variant                       |
| 28A | <i>TP53</i>   | 17 | 7579472 | G | C | 52.5%  | 1004 | 908  | 1912 | p.P72R   | missense_variant                       |
| 29A | <i>FLT3</i>   | 13 | 2.9E+07 | A | G | 100.0% | 1993 | 0    | 1993 | -        | splice_region_variant,intron_variant   |
| 4A  | <i>APC</i>    | 5  | 1.1E+08 | A | T | 24.9%  | 498  | 1499 | 1997 | p.K1308* | stop_gained                            |
| 4A  | <i>FBXW7</i>  | 4  | 1.5E+08 | G | A | 11.9%  | 237  | 1762 | 1999 | p.R505C  | missense_variant                       |
| 5A  | <i>KRAS</i>   | 12 | 2.5E+07 | C | T | 54.3%  | 999  | 841  | 1840 | p.G13D   | missense_variant                       |

|     |               |    |         |     |       |        |      |      |      |           |                                                        |
|-----|---------------|----|---------|-----|-------|--------|------|------|------|-----------|--------------------------------------------------------|
| 5A  | <i>TP53</i>   | 17 | 7577117 | A   | T     | 53.3%  | 1064 | 932  | 1996 | p.V274D   | missense_variant                                       |
| 29A | <i>KDR</i>    | 4  | 5.6E+07 | T   | A     | 52.4%  | 1045 | 951  | 1996 | p.Q472H   | missense_variant                                       |
| 29A | <i>TP53</i>   | 17 | 7579472 | G   | C     | 100.0% | 1943 | 0    | 1943 | p.P72R    | missense_variant                                       |
| 5A  | <i>SMAD4</i>  | 18 | 4.9E+07 | A   | T     | 38.3%  | 764  | 1230 | 1994 | p.D360V   | missense_variant                                       |
| 5A  | <i>PIK3CA</i> | 3  | 1.8E+08 | G   | A     | 29.2%  | 582  | 1413 | 1995 | p.M1043I  | missense_variant                                       |
| 6A  | <i>FBXW7</i>  | 4  | 1.5E+08 | G   | A     | 33.2%  | 664  | 1333 | 1997 | p.R505C   | missense_variant                                       |
| 6A  | <i>APC</i>    | 5  | 1.1E+08 | C   | CAGCT | 22.7%  | 451  | 1534 | 1985 | p.E1317fs | frameshift_variant,feature_elongation                  |
| 6A  | <i>KRAS</i>   | 12 | 2.5E+07 | C   | T     | 22.3%  | 423  | 1471 | 1894 | p.G13D    | missense_variant                                       |
| 7A  | <i>TP53</i>   | 17 | 7577568 | C   | G     | 38.4%  | 762  | 1222 | 1984 | p.C238S   | missense_variant                                       |
| 7A  | <i>STK11</i>  | 19 | 1220364 | G   | A     | 7.5%   | 28   | 344  | 372  | -         | splice_region_variant,intron_variant                   |
| 7A  | <i>GNA11</i>  | 19 | 3118938 | G   | A     | 6.5%   | 32   | 460  | 495  | p.G208S   | missense_variant                                       |
| 7A  | <i>STK11</i>  | 19 | 1207066 | G   | A     | 5.2%   | 66   | 1206 | 1272 | p.G52R    | missense_variant                                       |
| 29B | <i>FLT3</i>   | 13 | 2.9E+07 | A   | G     | 100.0% | 1986 | 0    | 1986 | -         | splice_region_variant,intron_variant                   |
| 29B | <i>KDR</i>    | 4  | 5.6E+07 | T   | A     | 55.1%  | 1098 | 893  | 1991 | p.Q472H   | missense_variant                                       |
| 7B  | <i>FBXW7</i>  | 4  | 1.5E+08 | C   | T     | 5.2%   | 34   | 616  | 650  | p.G459E   | missense_variant                                       |
| 29B | <i>TP53</i>   | 17 | 7579472 | G   | C     | 91.4%  | 1805 | 170  | 1975 | p.P72R    | missense_variant                                       |
| 8A  | <i>TP53</i>   | 17 | 7579409 | AGG | A     | 29.9%  | 489  | 1144 | 1637 | p.L93fs   | frameshift_variant,missense_variant,feature_truncation |
| 30A | <i>FLT3</i>   | 13 | 2.9E+07 | A   | G     | 100.0% | 1990 | 0    | 1990 | -         | splice_region_variant,intron_variant                   |
| 30A | <i>KDR</i>    | 4  | 5.6E+07 | T   | A     | 100.0% | 1979 | 0    | 1979 | p.Q472H   | missense_variant                                       |
| 8A  | <i>KRAS</i>   | 12 | 2.5E+07 | C   | A     | 24.2%  | 467  | 1463 | 1930 | p.G12V    | missense_variant                                       |
| 8A  | <i>APC</i>    | 5  | 1.1E+08 | GA  | G     | 16.4%  | 313  | 1592 | 1905 | p.S1436fs | frameshift_variant,missense_variant,feature_truncation |
| 30A | <i>TP53</i>   | 17 | 7579472 | G   | C     | 67.0%  | 1185 | 583  | 1768 | p.P72R    | missense_variant                                       |

|     |               |    |         |   |   |        |      |      |      |         |                                      |
|-----|---------------|----|---------|---|---|--------|------|------|------|---------|--------------------------------------|
| 30B | <i>FLT3</i>   | 13 | 2.9E+07 | A | G | 100.0% | 1992 | 0    | 1992 | -       | splice_region_variant,intron_variant |
| 9A  | <i>TP53</i>   | 17 | 7578236 | A | T | 31.2%  | 620  | 1369 | 1989 | p.Y205N | missense_variant                     |
| 30B | <i>KDR</i>    | 4  | 5.6E+07 | T | A | 98.9%  | 1967 | 21   | 1988 | p.Q472H | missense_variant                     |
| 2A  | <i>RET</i>    | 10 | 4.4E+07 | G | A | 5.4%   | 109  | 1891 | 2000 | p.R886Q | missense_variant                     |
| 9A  | <i>KRAS</i>   | 12 | 2.5E+07 | C | T | 20.6%  | 253  | 975  | 1228 | p.G12D  | missense_variant                     |
| 9A  | <i>RB1</i>    | 13 | 4.9E+07 | C | T | 6.1%   | 28   | 428  | 456  | p.R320* | stop_gained                          |
| 9A  | <i>STK11</i>  | 19 | 1220395 | G | A | 5.5%   | 36   | 621  | 657  | p.G163D | missense_variant                     |
| 30B | <i>TP53</i>   | 17 | 7579472 | G | C | 55.8%  | 1091 | 863  | 1954 | p.P72R  | missense_variant                     |
| 31A | <i>FLT3</i>   | 13 | 2.9E+07 | A | G | 98.7%  | 1970 | 26   | 1996 | -       | splice_region_variant,intron_variant |
| 31A | <i>KDR</i>    | 4  | 5.6E+07 | T | A | 56.3%  | 485  | 376  | 861  | p.Q472H | missense_variant                     |
| 9A  | <i>CTNNB1</i> | 3  | 4.1E+07 | G | A | 5.0%   | 63   | 1189 | 1252 | p.G38S  | missense_variant                     |
| 31A | <i>TP53</i>   | 17 | 7579472 | G | C | 93.2%  | 1447 | 105  | 1552 | p.P72R  | missense_variant                     |
| 31B | <i>FLT3</i>   | 13 | 2.9E+07 | A | G | 100.0% | 1984 | 0    | 1984 | -       | splice_region_variant,intron_variant |
| 31B | <i>KDR</i>    | 4  | 5.6E+07 | T | A | 50.5%  | 1006 | 988  | 1994 | p.Q472H | missense_variant                     |
| 31B | <i>TP53</i>   | 17 | 7579472 | G | C | 100.0% | 1906 | 0    | 1906 | p.P72R  | missense_variant                     |

A : specimens were collected by biopsy before nCRT

B : specimens were collected by surgery after nCRT

\*indicated stop codon.

**Supplementary Table S3. Synonymous variants of genes with more than 5% frequency identified in each library**

| Sample code | Chromosome coordinate |     |          |     |     | Variant information |            |            |             | Functional annotation |                    |
|-------------|-----------------------|-----|----------|-----|-----|---------------------|------------|------------|-------------|-----------------------|--------------------|
|             | Gene symbol           | Chr | Position | Ref | Var | Var freq            | Var counts | Ref counts | Total depth | Protein change        | consequence        |
| 10A         | <i>FGFR3</i>          | 4   | 1807894  | G   | A   | 100.0%              | 1982       | 0          | 1982        | p.T651T               | synonymous_variant |
| 10A         | <i>PDGFRA</i>         | 4   | 5.5E+07  | A   | G   | 100.0%              | 1829       | 0          | 1829        | p.P567P               | synonymous_variant |
| 10A         | <i>APC</i>            | 5   | 1.1E+08  | G   | A   | 100.0%              | 1975       | 0          | 1975        | p.T1493T              | synonymous_variant |
| 10A         | <i>KIT</i>            | 4   | 5.6E+07  | A   | G   | 51.9%               | 1037       | 960        | 1997        | p.K546K               | synonymous_variant |
| 10A         | <i>RET</i>            | 10  | 4.4E+07  | G   | T   | 48.1%               | 957        | 1033       | 1990        | p.L769L               | synonymous_variant |
| 10B         | <i>FBXW7</i>          | 4   | 1.5E+08  | T   | C   | 5.0%                | 100        | 1898       | 1998        | p.Q508Q               | synonymous_variant |
| 10B         | <i>FGFR3</i>          | 4   | 1807894  | G   | A   | 100.0%              | 1985       | 0          | 1985        | p.T651T               | synonymous_variant |
| 10B         | <i>PDGFRA</i>         | 4   | 5.5E+07  | A   | G   | 100.0%              | 1862       | 0          | 1862        | p.P567P               | synonymous_variant |
| 10B         | <i>APC</i>            | 5   | 1.1E+08  | G   | A   | 99.9%               | 1962       | 0          | 1963        | p.T1493T              | synonymous_variant |
| 10B         | <i>KIT</i>            | 4   | 5.6E+07  | A   | G   | 50.2%               | 1005       | 995        | 2000        | p.K546K               | synonymous_variant |
| 10B         | <i>RET</i>            | 10  | 4.4E+07  | G   | T   | 49.5%               | 984        | 1004       | 1988        | p.L769L               | synonymous_variant |
| 11A         | <i>FGFR3</i>          | 4   | 1807894  | G   | A   | 100.0%              | 1975       | 0          | 1975        | p.T651T               | synonymous_variant |
| 11A         | <i>PDGFRA</i>         | 4   | 5.5E+07  | A   | G   | 100.0%              | 1838       | 0          | 1838        | p.P567P               | synonymous_variant |
| 11A         | <i>APC</i>            | 5   | 1.1E+08  | G   | A   | 100.0%              | 1969       | 0          | 1969        | p.T1493T              | synonymous_variant |
| 11A         | <i>EGFR</i>           | 7   | 5.5E+07  | G   | A   | 45.9%               | 656        | 773        | 1429        | p.Q787Q               | synonymous_variant |
| 11A         | <i>RET</i>            | 10  | 4.4E+07  | G   | T   | 100.0%              | 1970       | 0          | 1970        | p.L769L               | synonymous_variant |
| 11B         | <i>FGFR3</i>          | 4   | 1807894  | G   | A   | 100.0%              | 1980       | 0          | 1980        | p.T651T               | synonymous_variant |
| 11B         | <i>PDGFRA</i>         | 4   | 5.5E+07  | A   | G   | 100.0%              | 1867       | 0          | 1867        | p.P567P               | synonymous_variant |

|     |               |    |         |   |   |        |      |      |      |          |                    |
|-----|---------------|----|---------|---|---|--------|------|------|------|----------|--------------------|
| 11B | <i>APC</i>    | 5  | 1.1E+08 | G | A | 100.0% | 1959 | 0    | 1959 | p.T1493T | synonymous_variant |
| 11B | <i>EGFR</i>   | 7  | 5.5E+07 | G | A | 50.3%  | 1003 | 993  | 1996 | p.Q787Q  | synonymous_variant |
| 11B | <i>RET</i>    | 10 | 4.4E+07 | G | T | 100.0% | 1980 | 0    | 1980 | p.L769L  | synonymous_variant |
| 13A | <i>KDR</i>    | 4  | 5.6E+07 | C | T | 43.7%  | 848  | 1091 | 1939 | p.T1152T | synonymous_variant |
| 13A | <i>FBXW7</i>  | 4  | 1.5E+08 | T | C | 5.3%   | 106  | 1892 | 1998 | p.Q508Q  | synonymous_variant |
| 13A | <i>FGFR3</i>  | 4  | 1807894 | G | A | 100.0% | 1982 | 0    | 1982 | p.T651T  | synonymous_variant |
| 13A | <i>PDGFRA</i> | 4  | 5.5E+07 | A | G | 100.0% | 1859 | 0    | 1859 | p.P567P  | synonymous_variant |
| 13A | <i>APC</i>    | 5  | 1.1E+08 | G | A | 52.5%  | 1039 | 940  | 1980 | p.T1493T | synonymous_variant |
| 13A | <i>EGFR</i>   | 7  | 5.5E+07 | G | A | 49.8%  | 994  | 1002 | 1996 | p.Q787Q  | synonymous_variant |
| 13A | <i>RET</i>    | 10 | 4.4E+07 | G | T | 49.5%  | 985  | 1003 | 1988 | p.L769L  | synonymous_variant |
| 13B | <i>KDR</i>    | 4  | 5.6E+07 | C | T | 49.0%  | 976  | 1016 | 1992 | p.T1152T | synonymous_variant |
| 13B | <i>FGFR3</i>  | 4  | 1807894 | G | A | 100.0% | 1994 | 0    | 1994 | p.T651T  | synonymous_variant |
| 13B | <i>PDGFRA</i> | 4  | 5.5E+07 | A | G | 100.0% | 1848 | 0    | 1848 | p.P567P  | synonymous_variant |
| 13B | <i>APC</i>    | 5  | 1.1E+08 | G | A | 47.3%  | 922  | 1029 | 1951 | p.T1493T | synonymous_variant |
| 13B | <i>EGFR</i>   | 7  | 5.5E+07 | G | A | 48.9%  | 978  | 1020 | 1998 | p.Q787Q  | synonymous_variant |
| 13B | <i>RET</i>    | 10 | 4.4E+07 | G | T | 51.8%  | 1027 | 956  | 1983 | p.L769L  | synonymous_variant |
| 14A | <i>FGFR3</i>  | 4  | 1807894 | G | A | 100.0% | 1929 | 0    | 1929 | p.T651T  | synonymous_variant |
| 14A | <i>PDGFRA</i> | 4  | 5.5E+07 | A | G | 100.0% | 1825 | 0    | 1825 | p.P567P  | synonymous_variant |
| 14A | <i>APC</i>    | 5  | 1.1E+08 | G | A | 41.0%  | 799  | 1151 | 1950 | p.T1493T | synonymous_variant |
| 14A | <i>KIT</i>    | 4  | 5.6E+07 | A | G | 32.5%  | 650  | 1348 | 1998 | p.K546K  | synonymous_variant |
| 14A | <i>RET</i>    | 10 | 4.4E+07 | G | T | 58.6%  | 1168 | 824  | 1992 | p.L769L  | synonymous_variant |
| 14A | <i>SMO</i>    | 7  | 1.3E+08 | A | G | 37.8%  | 756  | 1242 | 1998 | p.E194E  | synonymous_variant |

|     |               |    |         |   |   |        |      |      |      |          |                    |
|-----|---------------|----|---------|---|---|--------|------|------|------|----------|--------------------|
| 14B | <i>FGFR3</i>  | 4  | 1807894 | G | A | 100.0% | 1985 | 0    | 1985 | p.T651T  | synonymous_variant |
| 14B | <i>PDGFRA</i> | 4  | 5.5E+07 | A | G | 100.0% | 1861 | 0    | 1861 | p.P567P  | synonymous_variant |
| 14B | <i>APC</i>    | 5  | 1.1E+08 | G | A | 51.1%  | 1004 | 960  | 1964 | p.T1493T | synonymous_variant |
| 14B | <i>KIT</i>    | 4  | 5.6E+07 | A | G | 51.4%  | 1027 | 971  | 1998 | p.K546K  | synonymous_variant |
| 14B | <i>RET</i>    | 10 | 4.4E+07 | G | T | 57.4%  | 1144 | 849  | 1993 | p.L769L  | synonymous_variant |
| 14B | <i>SMO</i>    | 7  | 1.3E+08 | A | G | 52.3%  | 1045 | 953  | 1998 | p.E194E  | synonymous_variant |
| 15A | <i>EGFR</i>   | 7  | 5.5E+07 | G | A | 49.8%  | 995  | 1004 | 1999 | p.T725T  | synonymous_variant |
| 15A | <i>FGFR3</i>  | 4  | 1807894 | G | A | 100.0% | 1555 | 0    | 1555 | p.T651T  | synonymous_variant |
| 15A | <i>PDGFRA</i> | 4  | 5.5E+07 | A | G | 100.0% | 1812 | 0    | 1812 | p.P567P  | synonymous_variant |
| 15A | <i>APC</i>    | 5  | 1.1E+08 | G | A | 78.4%  | 1530 | 422  | 1952 | p.T1493T | synonymous_variant |
| 15A | <i>EGFR</i>   | 7  | 5.5E+07 | G | A | 49.2%  | 587  | 606  | 1193 | p.Q787Q  | synonymous_variant |
| 15A | <i>HRAS</i>   | 11 | 534242  | A | G | 46.5%  | 929  | 1069 | 1998 | p.H27H   | synonymous_variant |
| 15A | <i>RET</i>    | 10 | 4.4E+07 | G | T | 24.3%  | 483  | 1504 | 1987 | p.L769L  | synonymous_variant |
| 15B | <i>EGFR</i>   | 7  | 5.5E+07 | G | A | 50.5%  | 1010 | 990  | 2000 | p.T725T  | synonymous_variant |
| 15B | <i>FBXW7</i>  | 4  | 1.5E+08 | T | C | 5.0%   | 100  | 1899 | 1999 | p.Q508Q  | synonymous_variant |
| 15B | <i>FGFR3</i>  | 4  | 1807894 | G | A | 100.0% | 1989 | 0    | 1989 | p.T651T  | synonymous_variant |
| 15B | <i>PDGFRA</i> | 4  | 5.5E+07 | A | G | 100.0% | 1869 | 0    | 1869 | p.P567P  | synonymous_variant |
| 15B | <i>APC</i>    | 5  | 1.1E+08 | G | A | 49.3%  | 967  | 995  | 1963 | p.T1493T | synonymous_variant |
| 15B | <i>EGFR</i>   | 7  | 5.5E+07 | G | A | 50.1%  | 819  | 816  | 1635 | p.Q787Q  | synonymous_variant |
| 15B | <i>HRAS</i>   | 11 | 534242  | A | G | 48.9%  | 976  | 1020 | 1996 | p.H27H   | synonymous_variant |
| 15B | <i>RET</i>    | 10 | 4.4E+07 | G | T | 48.4%  | 966  | 1028 | 1994 | p.L769L  | synonymous_variant |
| 17A | <i>FBXW7</i>  | 4  | 1.5E+08 | T | C | 5.0%   | 99   | 1898 | 1997 | p.Q508Q  | synonymous_variant |

|     |               |    |         |   |   |        |      |      |      |          |                    |
|-----|---------------|----|---------|---|---|--------|------|------|------|----------|--------------------|
| 17A | <i>FGFR3</i>  | 4  | 1807894 | G | A | 100.0% | 1032 | 0    | 1032 | p.T651T  | synonymous_variant |
| 17A | <i>PDGFRA</i> | 4  | 5.5E+07 | A | G | 100.0% | 1832 | 0    | 1832 | p.P567P  | synonymous_variant |
| 17A | <i>APC</i>    | 5  | 1.1E+08 | G | A | 100.0% | 1965 | 0    | 1965 | p.T1493T | synonymous_variant |
| 17A | <i>RET</i>    | 10 | 4.4E+07 | G | T | 57.4%  | 1143 | 848  | 1991 | p.L769L  | synonymous_variant |
| 17A | <i>RET</i>    | 10 | 4.4E+07 | C | G | 54.6%  | 740  | 615  | 1355 | p.S904S  | synonymous_variant |
| 17B | <i>FBXW7</i>  | 4  | 1.5E+08 | T | C | 5.9%   | 118  | 1877 | 1995 | p.Q508Q  | synonymous_variant |
| 17B | <i>FGFR3</i>  | 4  | 1807894 | G | A | 100.0% | 1985 | 0    | 1985 | p.T651T  | synonymous_variant |
| 17B | <i>PDGFRA</i> | 4  | 5.5E+07 | A | G | 100.0% | 1804 | 0    | 1804 | p.P567P  | synonymous_variant |
| 17B | <i>APC</i>    | 5  | 1.1E+08 | G | A | 100.0% | 1974 | 0    | 1974 | p.T1493T | synonymous_variant |
| 17B | <i>RET</i>    | 10 | 4.4E+07 | G | T | 48.4%  | 961  | 1025 | 1986 | p.L769L  | synonymous_variant |
| 17B | <i>RET</i>    | 10 | 4.4E+07 | C | G | 49.2%  | 979  | 1009 | 1988 | p.S904S  | synonymous_variant |
| 18A | <i>FBXW7</i>  | 4  | 1.5E+08 | T | C | 5.2%   | 103  | 1895 | 1998 | p.Q508Q  | synonymous_variant |
| 18A | <i>FGFR3</i>  | 4  | 1807894 | G | A | 100.0% | 1986 | 0    | 1986 | p.T651T  | synonymous_variant |
| 18A | <i>PDGFRA</i> | 4  | 5.5E+07 | A | G | 99.9%  | 1861 | 1    | 1862 | p.P567P  | synonymous_variant |
| 18A | <i>APC</i>    | 5  | 1.1E+08 | G | A | 100.0% | 1974 | 0    | 1974 | p.T1493T | synonymous_variant |
| 18A | <i>MET</i>    | 7  | 1.2E+08 | C | T | 45.7%  | 911  | 1084 | 1995 | p.S178S  | synonymous_variant |
| 18A | <i>RET</i>    | 10 | 4.4E+07 | G | T | 34.1%  | 678  | 1308 | 1986 | p.L769L  | synonymous_variant |
| 18B | <i>FBXW7</i>  | 4  | 1.5E+08 | T | C | 5.5%   | 110  | 1888 | 1998 | p.Q508Q  | synonymous_variant |
| 18B | <i>FGFR3</i>  | 4  | 1807894 | G | A | 100.0% | 1978 | 0    | 1978 | p.T651T  | synonymous_variant |
| 18B | <i>PDGFRA</i> | 4  | 5.5E+07 | A | G | 100.0% | 1870 | 0    | 1870 | p.P567P  | synonymous_variant |
| 18B | <i>APC</i>    | 5  | 1.1E+08 | G | A | 100.0% | 1972 | 0    | 1972 | p.T1493T | synonymous_variant |
| 18B | <i>MET</i>    | 7  | 1.2E+08 | C | T | 48.4%  | 965  | 1027 | 1992 | p.S178S  | synonymous_variant |



|     |               |    |         |   |   |        |      |      |      |          |                    |
|-----|---------------|----|---------|---|---|--------|------|------|------|----------|--------------------|
| 18B | <i>RET</i>    | 10 | 4.4E+07 | G | T | 46.9%  | 935  | 1060 | 1995 | p.L769L  | synonymous_variant |
| 19A | <i>FGFR3</i>  | 4  | 1807894 | G | A | 100.0% | 1611 | 0    | 1611 | p.T651T  | synonymous_variant |
| 19A | <i>PDGFRA</i> | 4  | 5.5E+07 | A | G | 100.0% | 994  | 0    | 994  | p.P567P  | synonymous_variant |
| 19A | <i>APC</i>    | 5  | 1.1E+08 | G | A | 100.0% | 1957 | 0    | 1957 | p.T1493T | synonymous_variant |
| 19A | <i>EGFR</i>   | 7  | 5.5E+07 | G | A | 49.9%  | 379  | 381  | 760  | p.Q787Q  | synonymous_variant |
| 19A | <i>HRAS</i>   | 11 | 534242  | A | G | 30.6%  | 472  | 1070 | 1542 | p.H27H   | synonymous_variant |
| 19A | <i>RET</i>    | 10 | 4.4E+07 | G | T | 45.5%  | 896  | 1075 | 1971 | p.L769L  | synonymous_variant |
| 19A | <i>RET</i>    | 10 | 4.4E+07 | C | G | 42.0%  | 458  | 633  | 1091 | p.S904S  | synonymous_variant |
| 19A | <i>SMO</i>    | 7  | 1.3E+08 | A | G | 45.4%  | 894  | 1075 | 1969 | p.E194E  | synonymous_variant |
| 19B | <i>FGFR3</i>  | 4  | 1807894 | G | A | 100.0% | 1440 | 0    | 1440 | p.T651T  | synonymous_variant |
| 19B | <i>PDGFRA</i> | 4  | 5.5E+07 | A | G | 100.0% | 1863 | 0    | 1863 | p.P567P  | synonymous_variant |
| 19B | <i>APC</i>    | 5  | 1.1E+08 | G | A | 100.0% | 1978 | 0    | 1978 | p.T1493T | synonymous_variant |
| 19B | <i>EGFR</i>   | 7  | 5.5E+07 | G | A | 49.8%  | 656  | 662  | 1318 | p.Q787Q  | synonymous_variant |
| 19B | <i>HRAS</i>   | 11 | 534242  | A | G | 47.8%  | 829  | 904  | 1733 | p.H27H   | synonymous_variant |
| 19B | <i>RET</i>    | 10 | 4.4E+07 | G | T | 49.9%  | 991  | 994  | 1985 | p.L769L  | synonymous_variant |
| 19B | <i>RET</i>    | 10 | 4.4E+07 | C | G | 49.0%  | 977  | 1015 | 1992 | p.S904S  | synonymous_variant |
| 19B | <i>SMO</i>    | 7  | 1.3E+08 | A | G | 50.8%  | 1016 | 984  | 2000 | p.E194E  | synonymous_variant |
| 1A  | <i>FGFR3</i>  | 4  | 1807894 | G | A | 100.0% | 1983 | 0    | 1983 | p.T651T  | synonymous_variant |
| 1A  | <i>IDH1</i>   | 2  | 2.1E+08 | G | A | 47.2%  | 942  | 1054 | 1996 | p.G105G  | synonymous_variant |
| 1A  | <i>PDGFRA</i> | 4  | 5.5E+07 | A | G | 100.0% | 1806 | 0    | 1806 | p.P567P  | synonymous_variant |
| 1A  | <i>APC</i>    | 5  | 1.1E+08 | G | A | 100.0% | 1952 | 0    | 1952 | p.T1493T | synonymous_variant |
| 1A  | <i>KIT</i>    | 4  | 5.6E+07 | A | G | 46.6%  | 928  | 1065 | 1993 | p.K546K  | synonymous_variant |

|     |               |    |         |   |   |        |      |      |      |          |                    |
|-----|---------------|----|---------|---|---|--------|------|------|------|----------|--------------------|
| 1A  | <i>SMO</i>    | 7  | 1.3E+08 | A | G | 49.5%  | 991  | 1009 | 2000 | p.E194E  | synonymous_variant |
| 1B  | <i>FGFR3</i>  | 4  | 1807894 | G | A | 100.0% | 1991 | 0    | 1991 | p.T651T  | synonymous_variant |
| 1B  | <i>IDH1</i>   | 2  | 2.1E+08 | G | A | 50.6%  | 1007 | 982  | 1989 | p.G105G  | synonymous_variant |
| 1B  | <i>PDGFRA</i> | 4  | 5.5E+07 | A | G | 100.0% | 1795 | 0    | 1795 | p.P567P  | synonymous_variant |
| 1B  | <i>APC</i>    | 5  | 1.1E+08 | G | A | 100.0% | 1969 | 0    | 1969 | p.T1493T | synonymous_variant |
| 1B  | <i>KIT</i>    | 4  | 5.6E+07 | A | G | 50.9%  | 1017 | 981  | 1998 | p.K546K  | synonymous_variant |
| 1B  | <i>SMO</i>    | 7  | 1.3E+08 | A | G | 48.0%  | 959  | 1040 | 1999 | p.E194E  | synonymous_variant |
| 20A | <i>FGFR3</i>  | 4  | 1807894 | G | A | 100.0% | 1991 | 0    | 1991 | p.T651T  | synonymous_variant |
| 20A | <i>PDGFRA</i> | 4  | 5.5E+07 | A | G | 100.0% | 1489 | 0    | 1489 | p.P567P  | synonymous_variant |
| 20A | <i>APC</i>    | 5  | 1.1E+08 | G | A | 52.9%  | 1047 | 932  | 1979 | p.T1493T | synonymous_variant |
| 20B | <i>FGFR3</i>  | 4  | 1807894 | G | A | 100.0% | 1986 | 0    | 1986 | p.T651T  | synonymous_variant |
| 20B | <i>PDGFRA</i> | 4  | 5.5E+07 | A | G | 100.0% | 1835 | 0    | 1835 | p.P567P  | synonymous_variant |
| 20B | <i>APC</i>    | 5  | 1.1E+08 | G | A | 48.5%  | 955  | 1013 | 1968 | p.T1493T | synonymous_variant |
| 21A | <i>FGFR3</i>  | 4  | 1807894 | G | A | 100.0% | 1977 | 0    | 1977 | p.T651T  | synonymous_variant |
| 21A | <i>PDGFRA</i> | 4  | 5.5E+07 | A | G | 100.0% | 1637 | 0    | 1637 | p.P567P  | synonymous_variant |
| 21A | <i>APC</i>    | 5  | 1.1E+08 | G | A | 100.0% | 1973 | 0    | 1973 | p.T1493T | synonymous_variant |
| 21A | <i>HRAS</i>   | 11 | 534242  | A | G | 42.3%  | 844  | 1153 | 1997 | p.H27H   | synonymous_variant |
| 21A | <i>RET</i>    | 10 | 4.4E+07 | G | T | 8.2%   | 162  | 1821 | 1983 | p.L769L  | synonymous_variant |
| 22A | <i>FGFR3</i>  | 4  | 1807894 | G | A | 100.0% | 1984 | 0    | 1984 | p.T651T  | synonymous_variant |
| 22A | <i>PDGFRA</i> | 4  | 5.5E+07 | A | G | 100.0% | 1763 | 0    | 1763 | p.P567P  | synonymous_variant |
| 22A | <i>APC</i>    | 5  | 1.1E+08 | G | A | 60.4%  | 1196 | 783  | 1979 | p.T1493T | synonymous_variant |
| 22A | <i>HRAS</i>   | 11 | 534242  | A | G | 60.1%  | 1200 | 797  | 1997 | p.H27H   | synonymous_variant |

|     |               |    |         |   |   |        |      |      |      |          |                    |
|-----|---------------|----|---------|---|---|--------|------|------|------|----------|--------------------|
| 22B | <i>FGFR3</i>  | 4  | 1807894 | G | A | 100.0% | 1986 | 0    | 1986 | p.T651T  | synonymous_variant |
| 22B | <i>PDGFRA</i> | 4  | 5.5E+07 | A | G | 100.0% | 1836 | 0    | 1836 | p.P567P  | synonymous_variant |
| 22B | <i>APC</i>    | 5  | 1.1E+08 | G | A | 49.3%  | 966  | 995  | 1961 | p.T1493T | synonymous_variant |
| 22B | <i>HRAS</i>   | 11 | 534242  | A | G | 51.1%  | 1021 | 976  | 1997 | p.H27H   | synonymous_variant |
| 23A | <i>FGFR3</i>  | 4  | 1807894 | G | A | 100.0% | 1981 | 0    | 1981 | p.T651T  | synonymous_variant |
| 23A | <i>PDGFRA</i> | 4  | 5.5E+07 | A | G | 100.0% | 1856 | 0    | 1856 | p.P567P  | synonymous_variant |
| 23A | <i>APC</i>    | 5  | 1.1E+08 | G | A | 100.0% | 1965 | 0    | 1965 | p.T1493T | synonymous_variant |
| 23A | <i>HRAS</i>   | 11 | 534242  | A | G | 98.4%  | 1965 | 32   | 1997 | p.H27H   | synonymous_variant |
| 23A | <i>RET</i>    | 10 | 4.4E+07 | G | T | 61.5%  | 1218 | 762  | 1980 | p.L769L  | synonymous_variant |
| 23B | <i>FGFR3</i>  | 4  | 1807894 | G | A | 100.0% | 1975 | 0    | 1975 | p.T651T  | synonymous_variant |
| 23B | <i>PDGFRA</i> | 4  | 5.5E+07 | A | G | 100.0% | 1599 | 0    | 1599 | p.P567P  | synonymous_variant |
| 23B | <i>APC</i>    | 5  | 1.1E+08 | G | A | 100.0% | 1958 | 0    | 1958 | p.T1493T | synonymous_variant |
| 23B | <i>HRAS</i>   | 11 | 534242  | A | G | 98.0%  | 1948 | 39   | 1987 | p.H27H   | synonymous_variant |
| 23B | <i>RET</i>    | 10 | 4.4E+07 | G | T | 49.3%  | 980  | 1009 | 1989 | p.L769L  | synonymous_variant |
| 24A | <i>FGFR3</i>  | 4  | 1807894 | G | A | 100.0% | 1987 | 0    | 1987 | p.T651T  | synonymous_variant |
| 24A | <i>PDGFRA</i> | 4  | 5.5E+07 | A | G | 100.0% | 1805 | 0    | 1805 | p.P567P  | synonymous_variant |
| 24A | <i>APC</i>    | 5  | 1.1E+08 | G | A | 100.0% | 1976 | 0    | 1976 | p.T1493T | synonymous_variant |
| 24A | <i>RET</i>    | 10 | 4.4E+07 | G | T | 52.2%  | 1037 | 949  | 1986 | p.L769L  | synonymous_variant |
| 24A | <i>RET</i>    | 10 | 4.4E+07 | C | G | 50.4%  | 923  | 909  | 1832 | p.S904S  | synonymous_variant |
| 24B | <i>FGFR3</i>  | 4  | 1807894 | G | A | 100.0% | 1983 | 0    | 1983 | p.T651T  | synonymous_variant |
| 24B | <i>PDGFRA</i> | 4  | 5.5E+07 | A | G | 100.0% | 1872 | 0    | 1872 | p.P567P  | synonymous_variant |
| 24B | <i>APC</i>    | 5  | 1.1E+08 | G | A | 100.0% | 1964 | 0    | 1964 | p.T1493T | synonymous_variant |

|     |               |    |         |   |   |        |      |      |      |          |                    |
|-----|---------------|----|---------|---|---|--------|------|------|------|----------|--------------------|
| 24B | <i>RET</i>    | 10 | 4.4E+07 | G | T | 51.5%  | 1023 | 962  | 1985 | p.L769L  | synonymous_variant |
| 24B | <i>RET</i>    | 10 | 4.4E+07 | C | G | 54.2%  | 1080 | 913  | 1993 | p.S904S  | synonymous_variant |
| 25A | <i>FGFR3</i>  | 4  | 1807894 | G | A | 99.0%  | 1002 | 10   | 1012 | p.T651T  | synonymous_variant |
| 25A | <i>PDGFRA</i> | 4  | 5.5E+07 | A | G | 100.0% | 1837 | 0    | 1837 | p.P567P  | synonymous_variant |
| 25A | <i>APC</i>    | 5  | 1.1E+08 | G | A | 55.5%  | 1089 | 873  | 1962 | p.T1493T | synonymous_variant |
| 25A | <i>EGFR</i>   | 7  | 5.5E+07 | G | A | 50.1%  | 331  | 330  | 661  | p.Q787Q  | synonymous_variant |
| 25A | <i>HRAS</i>   | 11 | 534242  | A | G | 98.6%  | 1283 | 18   | 1301 | p.H27H   | synonymous_variant |
| 25A | <i>PDGFRA</i> | 4  | 5.5E+07 | C | T | 51.7%  | 1032 | 964  | 1996 | p.V824V  | synonymous_variant |
| 25A | <i>RET</i>    | 10 | 4.4E+07 | G | T | 51.6%  | 1025 | 961  | 1986 | p.L769L  | synonymous_variant |
| 25B | <i>FGFR3</i>  | 4  | 1807894 | G | A | 100.0% | 1987 | 0    | 1987 | p.T651T  | synonymous_variant |
| 25B | <i>PDGFRA</i> | 4  | 5.5E+07 | A | G | 100.0% | 1865 | 0    | 1865 | p.P567P  | synonymous_variant |
| 25B | <i>APC</i>    | 5  | 1.1E+08 | G | A | 52.5%  | 1034 | 937  | 1971 | p.T1493T | synonymous_variant |
| 25B | <i>EGFR</i>   | 7  | 5.5E+07 | G | A | 51.5%  | 1028 | 970  | 1998 | p.Q787Q  | synonymous_variant |
| 25B | <i>HRAS</i>   | 11 | 534242  | A | G | 100.0% | 1980 | 0    | 1980 | p.H27H   | synonymous_variant |
| 25B | <i>PDGFRA</i> | 4  | 5.5E+07 | C | T | 47.8%  | 955  | 1043 | 1998 | p.V824V  | synonymous_variant |
| 25B | <i>RET</i>    | 10 | 4.4E+07 | G | T | 48.3%  | 959  | 1028 | 1987 | p.L769L  | synonymous_variant |
| 26A | <i>KRAS</i>   | 12 | 2.5E+07 | T | G | 17.7%  | 352  | 1635 | 1987 | p.A59A   | synonymous_variant |
| 26A | <i>FGFR3</i>  | 4  | 1807894 | G | A | 100.0% | 1363 | 0    | 1363 | p.T651T  | synonymous_variant |
| 26A | <i>PDGFRA</i> | 4  | 5.5E+07 | A | G | 100.0% | 1871 | 0    | 1871 | p.P567P  | synonymous_variant |
| 26A | <i>APC</i>    | 5  | 1.1E+08 | G | A | 62.1%  | 1220 | 745  | 1965 | p.T1493T | synonymous_variant |
| 26A | <i>HRAS</i>   | 11 | 534242  | A | G | 46.8%  | 880  | 1002 | 1882 | p.H27H   | synonymous_variant |
| 26A | <i>RET</i>    | 10 | 4.4E+07 | G | T | 100.0% | 1979 | 0    | 1979 | p.L769L  | synonymous_variant |

|     |               |    |         |   |   |        |      |      |      |          |                    |
|-----|---------------|----|---------|---|---|--------|------|------|------|----------|--------------------|
| 26A | <i>RET</i>    | 10 | 4.4E+07 | C | G | 29.1%  | 579  | 1409 | 1988 | p.S904S  | synonymous_variant |
| 26A | <i>SMO</i>    | 7  | 1.3E+08 | A | G | 98.6%  | 1972 | 28   | 2000 | p.E194E  | synonymous_variant |
| 27A | <i>FGFR3</i>  | 4  | 1807894 | G | A | 100.0% | 1428 | 0    | 1428 | p.T651T  | synonymous_variant |
| 27A | <i>PDGFRA</i> | 4  | 5.5E+07 | A | G | 100.0% | 1853 | 0    | 1853 | p.P567P  | synonymous_variant |
| 27A | <i>APC</i>    | 5  | 1.1E+08 | G | A | 100.0% | 1961 | 0    | 1961 | p.T1493T | synonymous_variant |
| 27A | <i>RET</i>    | 10 | 4.4E+07 | G | T | 49.9%  | 990  | 993  | 1983 | p.L769L  | synonymous_variant |
| 27A | <i>SMO</i>    | 7  | 1.3E+08 | A | G | 43.9%  | 877  | 1123 | 2000 | p.E194E  | synonymous_variant |
| 27B | <i>FGFR3</i>  | 4  | 1807894 | G | A | 100.0% | 1980 | 0    | 1980 | p.T651T  | synonymous_variant |
| 27B | <i>PDGFRA</i> | 4  | 5.5E+07 | A | G | 100.0% | 1874 | 0    | 1874 | p.P567P  | synonymous_variant |
| 27B | <i>APC</i>    | 5  | 1.1E+08 | G | A | 100.0% | 1970 | 0    | 1970 | p.T1493T | synonymous_variant |
| 27B | <i>RET</i>    | 10 | 4.4E+07 | G | T | 47.8%  | 950  | 1038 | 1988 | p.L769L  | synonymous_variant |
| 27B | <i>SMO</i>    | 7  | 1.3E+08 | A | G | 51.2%  | 1024 | 975  | 1999 | p.E194E  | synonymous_variant |
| 28A | <i>FGFR3</i>  | 4  | 1807894 | G | A | 100.0% | 1976 | 0    | 1976 | p.T651T  | synonymous_variant |
| 28A | <i>PDGFRA</i> | 4  | 5.5E+07 | A | G | 100.0% | 1837 | 0    | 1837 | p.P567P  | synonymous_variant |
| 28A | <i>APC</i>    | 5  | 1.1E+08 | G | A | 100.0% | 1960 | 0    | 1960 | p.T1493T | synonymous_variant |
| 28A | <i>EGFR</i>   | 7  | 5.5E+07 | G | A | 54.2%  | 877  | 740  | 1617 | p.Q787Q  | synonymous_variant |
| 28A | <i>RET</i>    | 10 | 4.4E+07 | G | T | 49.1%  | 973  | 1010 | 1983 | p.L769L  | synonymous_variant |
| 28A | <i>RET</i>    | 10 | 4.4E+07 | C | G | 50.2%  | 960  | 951  | 1911 | p.S904S  | synonymous_variant |
| 29A | <i>FGFR3</i>  | 4  | 1807894 | G | A | 100.0% | 1830 | 0    | 1830 | p.T651T  | synonymous_variant |
| 29A | <i>PDGFRA</i> | 4  | 5.5E+07 | A | G | 100.0% | 1820 | 0    | 1820 | p.P567P  | synonymous_variant |
| 29A | <i>APC</i>    | 5  | 1.1E+08 | G | A | 100.0% | 1953 | 0    | 1953 | p.T1493T | synonymous_variant |
| 29A | <i>EGFR</i>   | 7  | 5.5E+07 | G | A | 55.6%  | 850  | 679  | 1529 | p.Q787Q  | synonymous_variant |

|     |                |    |         |   |   |        |      |      |      |          |                    |
|-----|----------------|----|---------|---|---|--------|------|------|------|----------|--------------------|
| 29A | <i>HRAS</i>    | 11 | 534242  | A | G | 49.1%  | 980  | 1017 | 1997 | p.H27H   | synonymous_variant |
| 29A | <i>KIT</i>     | 4  | 5.6E+07 | A | G | 47.0%  | 940  | 1060 | 2000 | p.K546K  | synonymous_variant |
| 29A | <i>PDGFRA</i>  | 4  | 5.5E+07 | C | T | 45.5%  | 908  | 1089 | 1997 | p.V824V  | synonymous_variant |
| 29A | <i>RET</i>     | 10 | 4.4E+07 | G | T | 100.0% | 1978 | 0    | 1978 | p.L769L  | synonymous_variant |
| 29A | <i>RET</i>     | 10 | 4.4E+07 | C | G | 53.3%  | 1060 | 930  | 1990 | p.S904S  | synonymous_variant |
| 29B | <i>FGFR3</i>   | 4  | 1807894 | G | A | 100.0% | 1986 | 0    | 1986 | p.T651T  | synonymous_variant |
| 29B | <i>PDGFRA</i>  | 4  | 5.5E+07 | A | G | 100.0% | 1876 | 0    | 1876 | p.P567P  | synonymous_variant |
| 29B | <i>APC</i>     | 5  | 1.1E+08 | G | A | 100.0% | 1971 | 0    | 1971 | p.T1493T | synonymous_variant |
| 29B | <i>EGFR</i>    | 7  | 5.5E+07 | G | A | 47.6%  | 949  | 1046 | 1995 | p.Q787Q  | synonymous_variant |
| 29B | <i>HRAS</i>    | 11 | 534242  | A | G | 50.7%  | 1010 | 984  | 1994 | p.H27H   | synonymous_variant |
| 29B | <i>KIT</i>     | 4  | 5.6E+07 | A | G | 47.9%  | 958  | 1041 | 1999 | p.K546K  | synonymous_variant |
| 29B | <i>PDGFRA</i>  | 4  | 5.5E+07 | C | T | 46.4%  | 927  | 1070 | 1997 | p.V824V  | synonymous_variant |
| 29B | <i>RET</i>     | 10 | 4.4E+07 | G | T | 98.9%  | 1961 | 21   | 1982 | p.L769L  | synonymous_variant |
| 29B | <i>RET</i>     | 10 | 4.4E+07 | C | G | 51.7%  | 1030 | 962  | 1992 | p.S904S  | synonymous_variant |
| 2A  | <i>ATM</i>     | 11 | 1.1E+08 | G | A | 6.0%   | 72   | 1135 | 1207 | p.K1317K | synonymous_variant |
| 2A  | <i>FGFR3</i>   | 4  | 1806142 | C | T | 12.5%  | 250  | 1749 | 1999 | p.I387I  | synonymous_variant |
| 2A  | <i>JAK2</i>    | 9  | 5073748 | G | A | 5.5%   | 40   | 692  | 732  | p.L609L  | synonymous_variant |
| 2A  | <i>SMARCB1</i> | 22 | 2.4E+07 | C | T | 5.1%   | 39   | 728  | 767  | p.N380N  | synonymous_variant |
| 2A  | <i>STK11</i>   | 19 | 1223122 | C | G | 77.9%  | 1536 | 436  | 1972 | p.L353L  | synonymous_variant |
| 2A  | <i>FGFR3</i>   | 4  | 1807894 | G | A | 100.0% | 1988 | 0    | 1988 | p.T651T  | synonymous_variant |
| 2A  | <i>PDGFRA</i>  | 4  | 5.5E+07 | A | G | 100.0% | 634  | 0    | 634  | p.P567P  | synonymous_variant |
| 2A  | <i>APC</i>     | 5  | 1.1E+08 | G | A | 100.0% | 911  | 0    | 911  | p.T1493T | synonymous_variant |

|     |               |    |         |   |   |        |      |      |      |          |                    |
|-----|---------------|----|---------|---|---|--------|------|------|------|----------|--------------------|
| 2A  | <i>PDGFRA</i> | 4  | 5.5E+07 | C | T | 5.1%   | 90   | 1667 | 1757 | p.V824V  | synonymous_variant |
| 2B  | <i>FGFR3</i>  | 4  | 1806142 | C | T | 49.3%  | 985  | 1013 | 1998 | p.I387I  | synonymous_variant |
| 2B  | <i>STK11</i>  | 19 | 1223122 | C | G | 54.1%  | 1071 | 910  | 1981 | p.L353L  | synonymous_variant |
| 2B  | <i>FBXW7</i>  | 4  | 1.5E+08 | T | C | 5.0%   | 99   | 1899 | 1998 | p.Q508Q  | synonymous_variant |
| 2B  | <i>FGFR3</i>  | 4  | 1807894 | G | A | 100.0% | 1984 | 0    | 1984 | p.T651T  | synonymous_variant |
| 2B  | <i>PDGFRA</i> | 4  | 5.5E+07 | A | G | 100.0% | 1838 | 0    | 1838 | p.P567P  | synonymous_variant |
| 2B  | <i>APC</i>    | 5  | 1.1E+08 | G | A | 99.9%  | 1964 | 0    | 1965 | p.T1493T | synonymous_variant |
| 30A | <i>FGFR1</i>  | 8  | 3.8E+07 | C | T | 34.8%  | 694  | 1299 | 1993 | p.S158S  | synonymous_variant |
| 30A | <i>FGFR3</i>  | 4  | 1807894 | G | A | 100.0% | 1796 | 0    | 1796 | p.T651T  | synonymous_variant |
| 30A | <i>PDGFRA</i> | 4  | 5.5E+07 | A | G | 100.0% | 1860 | 0    | 1860 | p.P567P  | synonymous_variant |
| 30A | <i>APC</i>    | 5  | 1.1E+08 | G | A | 100.0% | 1961 | 0    | 1961 | p.T1493T | synonymous_variant |
| 30A | <i>RET</i>    | 10 | 4.4E+07 | G | T | 43.4%  | 861  | 1125 | 1986 | p.L769L  | synonymous_variant |
| 30B | <i>FGFR1</i>  | 8  | 3.8E+07 | C | T | 45.5%  | 899  | 1078 | 1977 | p.S158S  | synonymous_variant |
| 30B | <i>FGFR3</i>  | 4  | 1807894 | G | A | 100.0% | 1977 | 0    | 1977 | p.T651T  | synonymous_variant |
| 30B | <i>PDGFRA</i> | 4  | 5.5E+07 | A | G | 100.0% | 1833 | 0    | 1833 | p.P567P  | synonymous_variant |
| 30B | <i>APC</i>    | 5  | 1.1E+08 | G | A | 100.0% | 1955 | 0    | 1955 | p.T1493T | synonymous_variant |
| 30B | <i>RET</i>    | 10 | 4.4E+07 | G | T | 51.5%  | 1025 | 966  | 1991 | p.L769L  | synonymous_variant |
| 31A | <i>FGFR3</i>  | 4  | 1807894 | G | A | 100.0% | 1991 | 0    | 1991 | p.T651T  | synonymous_variant |
| 31A | <i>PDGFRA</i> | 4  | 5.5E+07 | A | G | 100.0% | 716  | 0    | 716  | p.P567P  | synonymous_variant |
| 31A | <i>APC</i>    | 5  | 1.1E+08 | G | A | 99.9%  | 1624 | 1    | 1625 | p.T1493T | synonymous_variant |
| 31A | <i>EGFR</i>   | 7  | 5.5E+07 | G | A | 100.0% | 1513 | 0    | 1513 | p.Q787Q  | synonymous_variant |
| 31A | <i>HRAS</i>   | 11 | 534242  | A | G | 50.7%  | 1012 | 985  | 1997 | p.H27H   | synonymous_variant |

|     |               |    |         |   |   |        |      |      |      |          |                    |
|-----|---------------|----|---------|---|---|--------|------|------|------|----------|--------------------|
| 31A | <i>RET</i>    | 10 | 4.4E+07 | G | T | 57.3%  | 1135 | 845  | 1980 | p.L769L  | synonymous_variant |
| 31B | <i>FGFR3</i>  | 4  | 1807894 | G | A | 100.0% | 1986 | 0    | 1986 | p.T651T  | synonymous_variant |
| 31B | <i>PDGFRA</i> | 4  | 5.5E+07 | A | G | 100.0% | 1811 | 0    | 1811 | p.P567P  | synonymous_variant |
| 31B | <i>APC</i>    | 5  | 1.1E+08 | G | A | 100.0% | 1944 | 0    | 1944 | p.T1493T | synonymous_variant |
| 31B | <i>EGFR</i>   | 7  | 5.5E+07 | G | A | 99.0%  | 1979 | 19   | 1998 | p.Q787Q  | synonymous_variant |
| 31B | <i>HRAS</i>   | 11 | 534242  | A | G | 48.9%  | 975  | 1018 | 1993 | p.H27H   | synonymous_variant |
| 31B | <i>RET</i>    | 10 | 4.4E+07 | G | T | 48.0%  | 956  | 1035 | 1991 | p.L769L  | synonymous_variant |
| 3A  | <i>ABL1</i>   | 9  | 1.3E+08 | C | T | 7.4%   | 79   | 987  | 1066 | p.F317F  | synonymous_variant |
| 3A  | <i>ATM</i>    | 11 | 1.1E+08 | T | C | 60.8%  | 1211 | 781  | 1992 | p.A1931A | synonymous_variant |
| 3A  | <i>ATM</i>    | 11 | 1.1E+08 | C | T | 5.9%   | 55   | 882  | 937  | p.F3049F | synonymous_variant |
| 3A  | <i>EGFR</i>   | 7  | 5.5E+07 | G | A | 5.3%   | 69   | 1196 | 1294 | p.K757K  | synonymous_variant |
| 3A  | <i>EGFR</i>   | 7  | 5.5E+07 | C | T | 6.6%   | 78   | 1109 | 1187 | p.F795F  | synonymous_variant |
| 3A  | <i>ERBB4</i>  | 2  | 2.1E+08 | C | T | 6.4%   | 47   | 693  | 740  | p.V348V  | synonymous_variant |
| 3A  | <i>FBXW7</i>  | 4  | 1.5E+08 | G | A | 5.7%   | 29   | 477  | 506  | p.H455H  | synonymous_variant |
| 3A  | <i>IDH2</i>   | 15 | 9.1E+07 | G | A | 6.4%   | 101  | 1479 | 1580 | p.V147V  | synonymous_variant |
| 3A  | <i>KDR</i>    | 4  | 5.6E+07 | C | T | 9.8%   | 92   | 849  | 941  | p.K887K  | synonymous_variant |
| 3A  | <i>KIT</i>    | 4  | 5.6E+07 | G | A | 5.9%   | 46   | 732  | 778  | p.E53E   | synonymous_variant |
| 3A  | <i>MET</i>    | 7  | 1.2E+08 | C | T | 6.6%   | 37   | 522  | 559  | p.L827L  | synonymous_variant |
| 3A  | <i>PDGFRA</i> | 4  | 5.5E+07 | C | T | 5.4%   | 82   | 1445 | 1527 | p.F678F  | synonymous_variant |
| 3A  | <i>PTEN</i>   | 10 | 9E+07   | G | A | 5.1%   | 28   | 526  | 554  | p.V175V  | synonymous_variant |
| 3A  | <i>RET</i>    | 10 | 4.4E+07 | C | T | 6.7%   | 87   | 1213 | 1300 | p.F644F  | synonymous_variant |
| 3A  | <i>TP53</i>   | 17 | 7579423 | G | A | 7.4%   | 95   | 1182 | 1277 | p.A88A   | synonymous_variant |



|    |               |    |         |   |   |        |      |      |      |          |                    |
|----|---------------|----|---------|---|---|--------|------|------|------|----------|--------------------|
| 3A | <i>FGFR3</i>  | 4  | 1807894 | G | A | 100.0% | 1991 | 0    | 1991 | p.T651T  | synonymous_variant |
| 3A | <i>PDGFRA</i> | 4  | 5.5E+07 | A | G | 100.0% | 812  | 0    | 812  | p.P567P  | synonymous_variant |
| 3A | <i>APC</i>    | 5  | 1.1E+08 | G | A | 54.8%  | 431  | 355  | 786  | p.T1493T | synonymous_variant |
| 3A | <i>EGFR</i>   | 7  | 5.5E+07 | G | A | 36.4%  | 432  | 756  | 1188 | p.Q787Q  | synonymous_variant |
| 3A | <i>HRAS</i>   | 11 | 534242  | A | G | 48.1%  | 961  | 1038 | 1999 | p.H27H   | synonymous_variant |
| 3A | <i>PDGFRA</i> | 4  | 5.5E+07 | C | T | 8.6%   | 163  | 1728 | 1891 | p.V824V  | synonymous_variant |
| 3A | <i>RET</i>    | 10 | 4.4E+07 | G | T | 100.0% | 1980 | 0    | 1980 | p.L769L  | synonymous_variant |
| 3A | <i>RET</i>    | 10 | 4.4E+07 | C | G | 100.0% | 1343 | 0    | 1343 | p.S904S  | synonymous_variant |
| 3A | <i>SMO</i>    | 7  | 1.3E+08 | A | G | 55.1%  | 1102 | 898  | 2000 | p.E194E  | synonymous_variant |
| 3B | <i>ATM</i>    | 11 | 1.1E+08 | T | C | 50.4%  | 1002 | 986  | 1988 | p.A1931A | synonymous_variant |
| 3B | <i>FGFR3</i>  | 4  | 1807894 | G | A | 100.0% | 1990 | 0    | 1990 | p.T651T  | synonymous_variant |
| 3B | <i>PDGFRA</i> | 4  | 5.5E+07 | A | G | 100.0% | 1831 | 0    | 1831 | p.P567P  | synonymous_variant |
| 3B | <i>APC</i>    | 5  | 1.1E+08 | G | A | 50.0%  | 978  | 979  | 1957 | p.T1493T | synonymous_variant |
| 3B | <i>EGFR</i>   | 7  | 5.5E+07 | G | A | 48.7%  | 973  | 1024 | 1997 | p.Q787Q  | synonymous_variant |
| 3B | <i>HRAS</i>   | 11 | 534242  | A | G | 48.0%  | 957  | 1036 | 1993 | p.H27H   | synonymous_variant |
| 3B | <i>RET</i>    | 10 | 4.4E+07 | G | T | 100.0% | 1974 | 0    | 1974 | p.L769L  | synonymous_variant |
| 3B | <i>RET</i>    | 10 | 4.4E+07 | C | G | 100.0% | 1976 | 0    | 1976 | p.S904S  | synonymous_variant |
| 3B | <i>SMO</i>    | 7  | 1.3E+08 | A | G | 47.2%  | 944  | 1056 | 2000 | p.E194E  | synonymous_variant |
| 4A | <i>FGFR3</i>  | 4  | 1807894 | G | A | 100.0% | 1982 | 0    | 1982 | p.T651T  | synonymous_variant |
| 4A | <i>PDGFRA</i> | 4  | 5.5E+07 | A | G | 100.0% | 1840 | 0    | 1840 | p.P567P  | synonymous_variant |
| 4A | <i>APC</i>    | 5  | 1.1E+08 | G | A | 37.6%  | 743  | 1232 | 1975 | p.T1493T | synonymous_variant |
| 4A | <i>RET</i>    | 10 | 4.4E+07 | G | T | 100.0% | 1973 | 0    | 1973 | p.L769L  | synonymous_variant |

|    |               |    |         |   |   |        |      |      |      |          |                    |
|----|---------------|----|---------|---|---|--------|------|------|------|----------|--------------------|
| 4A | <i>RET</i>    | 10 | 4.4E+07 | C | G | 54.6%  | 1088 | 906  | 1994 | p.S904S  | synonymous_variant |
| 4B | <i>FGFR3</i>  | 4  | 1807894 | G | A | 100.0% | 1992 | 0    | 1992 | p.T651T  | synonymous_variant |
| 4B | <i>PDGFRA</i> | 4  | 5.5E+07 | A | G | 100.0% | 1830 | 0    | 1830 | p.P567P  | synonymous_variant |
| 4B | <i>APC</i>    | 5  | 1.1E+08 | G | A | 49.0%  | 962  | 1003 | 1965 | p.T1493T | synonymous_variant |
| 4B | <i>RET</i>    | 10 | 4.4E+07 | G | T | 100.0% | 1981 | 0    | 1981 | p.L769L  | synonymous_variant |
| 4B | <i>RET</i>    | 10 | 4.4E+07 | C | G | 43.5%  | 860  | 1115 | 1975 | p.S904S  | synonymous_variant |
| 5A | <i>FBXW7</i>  | 4  | 1.5E+08 | T | C | 5.9%   | 118  | 1877 | 1995 | p.Q508Q  | synonymous_variant |
| 5A | <i>FGFR3</i>  | 4  | 1807894 | G | A | 100.0% | 1980 | 0    | 1980 | p.T651T  | synonymous_variant |
| 5A | <i>PDGFRA</i> | 4  | 5.5E+07 | A | G | 100.0% | 1847 | 0    | 1847 | p.P567P  | synonymous_variant |
| 5A | <i>APC</i>    | 5  | 1.1E+08 | G | A | 100.0% | 1964 | 0    | 1964 | p.T1493T | synonymous_variant |
| 5A | <i>HRAS</i>   | 11 | 534242  | A | G | 49.8%  | 993  | 1002 | 1995 | p.H27H   | synonymous_variant |
| 5A | <i>KIT</i>    | 4  | 5.6E+07 | A | G | 75.3%  | 1503 | 493  | 1996 | p.K546K  | synonymous_variant |
| 5A | <i>RET</i>    | 10 | 4.4E+07 | G | T | 76.1%  | 1505 | 473  | 1978 | p.L769L  | synonymous_variant |
| 5B | <i>FBXW7</i>  | 4  | 1.5E+08 | T | C | 5.5%   | 109  | 1889 | 1998 | p.Q508Q  | synonymous_variant |
| 5B | <i>FGFR3</i>  | 4  | 1807894 | G | A | 100.0% | 1990 | 0    | 1990 | p.T651T  | synonymous_variant |
| 5B | <i>PDGFRA</i> | 4  | 5.5E+07 | A | G | 100.0% | 1847 | 0    | 1847 | p.P567P  | synonymous_variant |
| 5B | <i>APC</i>    | 5  | 1.1E+08 | G | A | 100.0% | 1966 | 0    | 1966 | p.T1493T | synonymous_variant |
| 5B | <i>HRAS</i>   | 11 | 534242  | A | G | 47.2%  | 942  | 1053 | 1995 | p.H27H   | synonymous_variant |
| 5B | <i>KIT</i>    | 4  | 5.6E+07 | A | G | 48.4%  | 967  | 1030 | 1997 | p.K546K  | synonymous_variant |
| 5B | <i>RET</i>    | 10 | 4.4E+07 | G | T | 47.7%  | 945  | 1038 | 1983 | p.L769L  | synonymous_variant |
| 6A | <i>FGFR3</i>  | 4  | 1807894 | G | A | 100.0% | 1970 | 0    | 1970 | p.T651T  | synonymous_variant |
| 6A | <i>PDGFRA</i> | 4  | 5.5E+07 | A | G | 100.0% | 1857 | 0    | 1857 | p.P567P  | synonymous_variant |

|    |        |    |         |   |   |        |      |      |      |          |                    |
|----|--------|----|---------|---|---|--------|------|------|------|----------|--------------------|
| 6A | ALK    | 2  | 2.9E+07 | C | G | 45.4%  | 908  | 1091 | 1999 | p.A1200A | synonymous_variant |
| 6A | APC    | 5  | 1.1E+08 | G | A | 100.0% | 1965 | 0    | 1965 | p.T1493T | synonymous_variant |
| 6A | PDGFRA | 4  | 5.5E+07 | C | T | 42.8%  | 855  | 1143 | 1998 | p.V824V  | synonymous_variant |
| 6A | RET    | 10 | 4.4E+07 | G | T | 45.5%  | 904  | 1083 | 1987 | p.L769L  | synonymous_variant |
| 6B | FGFR3  | 4  | 1807894 | G | A | 100.0% | 1981 | 0    | 1981 | p.T651T  | synonymous_variant |
| 6B | PDGFRA | 4  | 5.5E+07 | A | G | 100.0% | 1849 | 0    | 1849 | p.P567P  | synonymous_variant |
| 6B | ALK    | 2  | 2.9E+07 | C | G | 43.8%  | 873  | 1118 | 1991 | p.A1200A | synonymous_variant |
| 6B | APC    | 5  | 1.1E+08 | G | A | 100.0% | 1969 | 0    | 1969 | p.T1493T | synonymous_variant |
| 6B | PDGFRA | 4  | 5.5E+07 | C | T | 49.6%  | 988  | 1004 | 1992 | p.V824V  | synonymous_variant |
| 6B | RET    | 10 | 4.4E+07 | G | T | 51.8%  | 1032 | 962  | 1994 | p.L769L  | synonymous_variant |
| 7A | TP53   | 17 | 7579465 | G | A | 6.5%   | 29   | 418  | 447  | p.A74A   | synonymous_variant |
| 7A | FGFR3  | 4  | 1807894 | G | A | 100.0% | 1165 | 0    | 1165 | p.T651T  | synonymous_variant |
| 7A | PDGFRA | 4  | 5.5E+07 | A | G | 100.0% | 966  | 0    | 966  | p.P567P  | synonymous_variant |
| 7A | ALK    | 2  | 2.9E+07 | C | G | 45.2%  | 482  | 584  | 1066 | p.A1200A | synonymous_variant |
| 7A | APC    | 5  | 1.1E+08 | G | A | 100.0% | 1312 | 0    | 1312 | p.T1493T | synonymous_variant |
| 7A | EGFR   | 7  | 5.5E+07 | G | A | 100.0% | 757  | 0    | 757  | p.Q787Q  | synonymous_variant |
| 7A | MET    | 7  | 1.2E+08 | C | T | 42.7%  | 853  | 1144 | 1997 | p.S178S  | synonymous_variant |
| 7B | FGFR3  | 4  | 1807894 | G | A | 100.0% | 1981 | 0    | 1981 | p.T651T  | synonymous_variant |
| 7B | PDGFRA | 4  | 5.5E+07 | A | G | 99.9%  | 1856 | 1    | 1857 | p.P567P  | synonymous_variant |
| 7B | ALK    | 2  | 2.9E+07 | C | G | 41.1%  | 818  | 1170 | 1988 | p.A1200A | synonymous_variant |
| 7B | APC    | 5  | 1.1E+08 | G | A | 100.0% | 1961 | 0    | 1961 | p.T1493T | synonymous_variant |
| 7B | EGFR   | 7  | 5.5E+07 | G | A | 97.3%  | 1944 | 54   | 1998 | p.Q787Q  | synonymous_variant |

|    |               |    |         |   |   |        |      |      |      |          |                    |
|----|---------------|----|---------|---|---|--------|------|------|------|----------|--------------------|
| 7B | <i>MET</i>    | 7  | 1.2E+08 | C | T | 46.4%  | 926  | 1068 | 1994 | p.S178S  | synonymous_variant |
| 8A | <i>FGFR3</i>  | 4  | 1807894 | G | A | 100.0% | 1983 | 0    | 1983 | p.T651T  | synonymous_variant |
| 8A | <i>PDGFRA</i> | 4  | 5.5E+07 | A | G | 100.0% | 1819 | 0    | 1819 | p.P567P  | synonymous_variant |
| 8A | <i>APC</i>    | 5  | 1.1E+08 | G | A | 100.0% | 1977 | 0    | 1977 | p.T1493T | synonymous_variant |
| 8A | <i>PDGFRA</i> | 4  | 5.5E+07 | C | T | 44.9%  | 897  | 1103 | 2000 | p.V824V  | synonymous_variant |
| 8A | <i>RET</i>    | 10 | 4.4E+07 | G | T | 100.0% | 1984 | 0    | 1984 | p.L769L  | synonymous_variant |
| 8A | <i>SMO</i>    | 7  | 1.3E+08 | A | G | 53.9%  | 1077 | 921  | 1998 | p.E194E  | synonymous_variant |
| 8B | <i>FGFR3</i>  | 4  | 1807894 | G | A | 100.0% | 1986 | 0    | 1986 | p.T651T  | synonymous_variant |
| 8B | <i>PDGFRA</i> | 4  | 5.5E+07 | A | G | 100.0% | 1839 | 0    | 1839 | p.P567P  | synonymous_variant |
| 8B | <i>APC</i>    | 5  | 1.1E+08 | G | A | 100.0% | 1978 | 0    | 1978 | p.T1493T | synonymous_variant |
| 8B | <i>PDGFRA</i> | 4  | 5.5E+07 | C | T | 49.9%  | 996  | 1001 | 1997 | p.V824V  | synonymous_variant |
| 8B | <i>RET</i>    | 10 | 4.4E+07 | G | T | 100.0% | 1972 | 0    | 1972 | p.L769L  | synonymous_variant |
| 8B | <i>SMO</i>    | 7  | 1.3E+08 | A | G | 49.8%  | 995  | 1002 | 1997 | p.E194E  | synonymous_variant |
| 9A | <i>STK11</i>  | 19 | 1220426 | G | A | 6.1%   | 40   | 617  | 657  | p.V173V  | synonymous_variant |
| 9A | <i>FGFR3</i>  | 4  | 1807894 | G | A | 100.0% | 1986 | 0    | 1986 | p.T651T  | synonymous_variant |
| 9A | <i>PDGFRA</i> | 4  | 5.5E+07 | A | G | 99.0%  | 880  | 9    | 889  | p.P567P  | synonymous_variant |
| 9A | <i>APC</i>    | 5  | 1.1E+08 | G | A | 100.0% | 1481 | 0    | 1481 | p.T1493T | synonymous_variant |
| 9A | <i>EGFR</i>   | 7  | 5.5E+07 | G | A | 42.1%  | 330  | 454  | 784  | p.Q787Q  | synonymous_variant |
| 9A | <i>PDGFRA</i> | 4  | 5.5E+07 | C | T | 13.1%  | 235  | 1565 | 1800 | p.V824V  | synonymous_variant |
| 9A | <i>RET</i>    | 10 | 4.4E+07 | G | T | 13.3%  | 263  | 1719 | 1982 | p.L769L  | synonymous_variant |
| 9A | <i>SMO</i>    | 7  | 1.3E+08 | A | G | 6.0%   | 120  | 1880 | 2000 | p.E194E  | synonymous_variant |
| 9B | <i>FGFR3</i>  | 4  | 1807894 | G | A | 100.0% | 1987 | 0    | 1987 | p.T651T  | synonymous_variant |

|    |               |   |         |   |   |        |      |     |      |          |                    |
|----|---------------|---|---------|---|---|--------|------|-----|------|----------|--------------------|
| 9B | <i>PDGFRA</i> | 4 | 5.5E+07 | A | G | 100.0% | 1861 | 0   | 1861 | p.P567P  | synonymous_variant |
| 9B | <i>APC</i>    | 5 | 1.1E+08 | G | A | 99.9%  | 1963 | 0   | 1964 | p.T1493T | synonymous_variant |
| 9B | <i>EGFR</i>   | 7 | 5.5E+07 | G | A | 53.8%  | 1073 | 922 | 1995 | p.Q787Q  | synonymous_variant |

A : specimens were collected by biopsy before nCRT

B : specimens were collected by surgery after nCRT

**Supplementary Table S4. Nonsynonymous variants of genes with 2%–5% frequency identified in each library**

| Sample code | Chromosome coordinate |     |          |     |     | Variant information |            |            |             | Functional annotation |                                        |
|-------------|-----------------------|-----|----------|-----|-----|---------------------|------------|------------|-------------|-----------------------|----------------------------------------|
|             | Gene symbol           | Chr | Position | Ref | Var | Var freq            | Var counts | Ref counts | Total depth | Protein change        | consequence                            |
| 2A          | <i>BRAF</i>           | 7   | 1.4E+08  | G   | A   | 4.4%                | 25         | 543        | 568         | p.L584F               | missense_variant                       |
| 2A          | <i>BRAF</i>           | 7   | 1.4E+08  | C   | T   | 4.2%                | 41         | 928        | 969         | p.D449N               | missense_variant                       |
| 2A          | <i>BRAF</i>           | 7   | 1.4E+08  | G   | A   | 2.3%                | 13         | 561        | 574         | p.A598V               | missense_variant                       |
| 2A          | <i>RET</i>            | 10  | 4.4E+07  | G   | A   | 4.6%                | 87         | 1796       | 1883        | p.R897Q               | missense_variant                       |
| 2A          | <i>PTEN</i>           | 10  | 9E+07    | G   | A   | 3.1%                | 40         | 1265       | 1305        | p.W111*               | stop_gained                            |
| 2A          | <i>PTEN</i>           | 10  | 9E+07    | C   | T   | 2.5%                | 33         | 1278       | 1311        | p.R130*               | stop_gained                            |
| 2A          | <i>PTEN</i>           | 10  | 9E+07    | G   | A   | 2.3%                | 13         | 557        | 570         | p.G165E               | missense_variant,splice_region_variant |
| 2A          | <i>PTEN</i>           | 10  | 9E+07    | G   | A   | 3.1%                | 18         | 558        | 576         | p.S170N               | missense_variant                       |
| 2A          | <i>PTEN</i>           | 10  | 9E+07    | G   | A   | 2.2%                | 24         | 1090       | 1114        | p.?_splice            | splice_acceptor_variant                |
| 2A          | <i>PTEN</i>           | 10  | 9E+07    | G   | A   | 3.0%                | 42         | 1368       | 1410        | p.G251D               | missense_variant                       |
| 2A          | <i>PTEN</i>           | 10  | 9E+07    | G   | A   | 3.5%                | 37         | 1009       | 1046        | p.A328T               | missense_variant                       |
| 2A          | <i>ATM</i>            | 11  | 1.1E+08  | C   | T   | 3.5%                | 32         | 871        | 903         | p.L409F               | missense_variant                       |
| 2A          | <i>ATM</i>            | 11  | 1.1E+08  | G   | A   | 4.3%                | 12         | 266        | 278         | p.E2884K              | missense_variant                       |
| 2A          | <i>PTPN11</i>         | 12  | 1.1E+08  | G   | A   | 4.5%                | 55         | 1161       | 1216        | p.V51I                | missense_variant                       |
| 2A          | <i>PTPN11</i>         | 12  | 1.1E+08  | G   | A   | 2.1%                | 26         | 1198       | 1224        | p.D61N                | missense_variant                       |
| 2A          | <i>RB1</i>            | 13  | 4.9E+07  | C   | T   | 4.3%                | 21         | 467        | 488         | p.T342I               | missense_variant                       |
| 2A          | <i>RB1</i>            | 13  | 4.9E+07  | G   | A   | 3.6%                | 25         | 678        | 703         | p.V366M               | missense_variant                       |
| 2A          | <i>TP53</i>           | 17  | 7577018  | C   | T   | 2.1%                | 41         | 1959       | 2000        | p.?_splice            | splice_donor_variant                   |

|    |               |    |         |   |   |      |    |      |      |          |                  |
|----|---------------|----|---------|---|---|------|----|------|------|----------|------------------|
| 2A | <i>TP53</i>   | 17 | 7577030 | C | T | 2.4% | 48 | 1951 | 1999 | p.S303N  | missense_variant |
| 2A | <i>TP53</i>   | 17 | 7577099 | C | T | 2.6% | 52 | 1947 | 1999 | p.R280K  | missense_variant |
| 2A | <i>TP53</i>   | 17 | 7577114 | C | T | 2.8% | 56 | 1943 | 1999 | p.C275Y  | missense_variant |
| 2A | <i>MLH1</i>   | 3  | 3.7E+07 | G | A | 3.8% | 63 | 1588 | 1651 | p.M383I  | missense_variant |
| 2A | <i>TP53</i>   | 17 | 7579382 | G | A | 2.5% | 48 | 1843 | 1891 | p.T102I  | missense_variant |
| 2A | <i>TP53</i>   | 17 | 7579394 | G | A | 2.4% | 47 | 1951 | 1998 | p.P98L   | missense_variant |
| 2A | <i>SMAD4</i>  | 18 | 4.9E+07 | C | T | 2.5% | 19 | 749  | 768  | p.Q116*  | stop_gained      |
| 2A | <i>SMAD4</i>  | 18 | 4.9E+07 | G | A | 3.7% | 28 | 739  | 767  | p.C127Y  | missense_variant |
| 2A | <i>SMAD4</i>  | 18 | 4.9E+07 | G | A | 4.8% | 37 | 738  | 775  | p.V335I  | missense_variant |
| 2A | <i>SMAD4</i>  | 18 | 4.9E+07 | G | A | 2.3% | 20 | 868  | 888  | p.A406T  | missense_variant |
| 2A | <i>SMAD4</i>  | 18 | 4.9E+07 | G | A | 3.7% | 33 | 861  | 894  | p.V409I  | missense_variant |
| 2A | <i>CTNNB1</i> | 3  | 4.1E+07 | C | T | 2.5% | 33 | 1277 | 1310 | p.S33F   | missense_variant |
| 2A | <i>PIK3CA</i> | 3  | 1.8E+08 | G | A | 3.1% | 26 | 820  | 846  | p.V344M  | missense_variant |
| 2A | <i>PIK3CA</i> | 3  | 1.8E+08 | G | A | 4.5% | 23 | 493  | 516  | p.A415T  | missense_variant |
| 2A | <i>PIK3CA</i> | 3  | 1.8E+08 | G | A | 2.2% | 34 | 1529 | 1563 | p.D538N  | missense_variant |
| 2A | <i>PIK3CA</i> | 3  | 1.8E+08 | G | A | 3.7% | 38 | 998  | 1036 | p.M1043I | missense_variant |
| 2A | <i>PIK3CA</i> | 3  | 1.8E+08 | C | T | 2.7% | 27 | 984  | 1011 | p.H1047Y | missense_variant |
| 2A | <i>PIK3CA</i> | 3  | 1.8E+08 | G | A | 2.3% | 23 | 964  | 987  | p.G1050S | missense_variant |
| 2A | <i>KIT</i>    | 4  | 5.6E+07 | C | T | 2.4% | 25 | 1009 | 1034 | p.P573L  | missense_variant |
| 2A | <i>KIT</i>    | 4  | 5.6E+07 | C | T | 3.6% | 37 | 1000 | 1037 | p.P577L  | missense_variant |
| 2A | <i>KIT</i>    | 4  | 5.6E+07 | G | A | 3.5% | 31 | 849  | 880  | p.G648D  | missense_variant |
| 2A | <i>KDR</i>    | 4  | 5.6E+07 | G | A | 3.5% | 27 | 750  | 777  | p.A473V  | missense_variant |

|     |         |    |         |   |   |      |    |      |      |          |                  |
|-----|---------|----|---------|---|---|------|----|------|------|----------|------------------|
| 2A  | APC     | 5  | 1.1E+08 | G | A | 3.5% | 42 | 1150 | 1192 | p.C1098Y | missense_variant |
| 2A  | APC     | 5  | 1.1E+08 | G | A | 4.2% | 20 | 458  | 478  | p.E1286K | missense_variant |
| 2A  | APC     | 5  | 1.1E+08 | C | T | 2.5% | 25 | 982  | 1007 | p.Q1367* | stop_gained      |
| 2A  | APC     | 5  | 1.1E+08 | C | T | 2.4% | 23 | 942  | 965  | p.Q1378* | stop_gained      |
| 2A  | APC     | 5  | 1.1E+08 | G | A | 4.1% | 33 | 773  | 806  | p.V1452I | missense_variant |
| 2A  | EGFR    | 7  | 5.5E+07 | C | T | 2.5% | 50 | 1945 | 1995 | p.A289V  | missense_variant |
| 2A  | EGFR    | 7  | 5.5E+07 | G | A | 2.2% | 44 | 1956 | 2000 | p.G810D  | missense_variant |
| 2A  | ERBB4   | 2  | 2.1E+08 | C | T | 3.8% | 49 | 1246 | 1295 | p.D585N  | missense_variant |
| 2B  | TP53    | 17 | 7577120 | C | T | 4.4% | 87 | 1912 | 1999 | p.R273H  | missense_variant |
| 30A | CDKN2A  | 9  | 2.2E+07 | G | A | 3.7% | 15 | 395  | 410  | p.T137I  | missense_variant |
| 30B | SMARCB1 | 22 | 2.4E+07 | C | A | 4.6% | 65 | 1346 | 1411 | p.T72K   | missense_variant |
| 31A | BRAF    | 7  | 1.4E+08 | C | T | 4.8% | 34 | 675  | 709  | p.G593D  | missense_variant |
| 31A | PTEN    | 10 | 9E+07   | G | A | 2.1% | 42 | 1958 | 2000 | p.G127R  | missense_variant |
| 31A | PTEN    | 10 | 9E+07   | G | A | 2.0% | 23 | 1099 | 1122 | p.S170N  | missense_variant |
| 31A | PTEN    | 10 | 9E+07   | C | T | 2.2% | 36 | 1576 | 1612 | p.Q214*  | stop_gained      |
| 31A | PTPN11  | 12 | 1.1E+08 | G | A | 2.6% | 49 | 1869 | 1918 | p.D61N   | missense_variant |
| 31A | PTPN11  | 12 | 1.1E+08 | G | A | 4.4% | 85 | 1829 | 1914 | p.G68R   | missense_variant |
| 31A | FLT3    | 13 | 2.9E+07 | C | T | 4.5% | 31 | 665  | 696  | p.W603*  | stop_gained      |
| 31A | IDH2    | 15 | 9.1E+07 | G | A | 2.1% | 41 | 1912 | 1953 | p.R140W  | missense_variant |
| 31A | TP53    | 17 | 7579422 | G | A | 3.1% | 48 | 1480 | 1528 | p.P89S   | missense_variant |
| 31A | ERBB2   | 17 | 3.8E+07 | G | A | 2.5% | 49 | 1911 | 1960 | p.V842I  | missense_variant |
| 31A | SMAD4   | 18 | 4.9E+07 | C | T | 2.0% | 20 | 993  | 1013 | p.R135*  | stop_gained      |



|     |               |    |         |   |   |      |    |      |      |          |                                        |
|-----|---------------|----|---------|---|---|------|----|------|------|----------|----------------------------------------|
| 31A | <i>SMAD4</i>  | 18 | 4.9E+07 | G | A | 2.8% | 48 | 1650 | 1698 | p.R361H  | missense_variant                       |
| 31A | <i>SMAD4</i>  | 18 | 4.9E+07 | G | A | 2.4% | 35 | 1432 | 1467 | p.A406T  | missense_variant                       |
| 31A | <i>SMAD4</i>  | 18 | 4.9E+07 | C | T | 2.2% | 43 | 1955 | 1998 | p.R531W  | missense_variant                       |
| 31A | <i>PDGFRA</i> | 4  | 5.5E+07 | G | A | 3.9% | 62 | 1508 | 1570 | p.E704K  | missense_variant                       |
| 31A | <i>KIT</i>    | 4  | 5.6E+07 | C | T | 3.6% | 46 | 1225 | 1271 | p.H580Y  | missense_variant                       |
| 31A | <i>KDR</i>    | 4  | 5.6E+07 | G | A | 4.5% | 38 | 801  | 839  | p.S475L  | missense_variant                       |
| 31A | <i>KDR</i>    | 4  | 5.6E+07 | C | T | 3.9% | 36 | 892  | 928  | p.W260*  | stop_gained                            |
| 31A | <i>KDR</i>    | 4  | 5.6E+07 | C | T | 3.8% | 35 | 891  | 926  | p.A248T  | missense_variant                       |
| 31A | <i>APC</i>    | 5  | 1.1E+08 | G | T | 4.7% | 81 | 1632 | 1713 | p.G1312* | stop_gained                            |
| 31A | <i>APC</i>    | 5  | 1.1E+08 | C | T | 3.6% | 12 | 320  | 332  | p.T1556I | missense_variant                       |
| 31A | <i>EGFR</i>   | 7  | 5.5E+07 | C | T | 2.1% | 41 | 1959 | 2000 | p.L730F  | missense_variant                       |
| 31A | <i>EGFR</i>   | 7  | 5.5E+07 | G | A | 3.0% | 55 | 1770 | 1825 | p.E746K  | missense_variant                       |
| 31A | <i>EGFR</i>   | 7  | 5.5E+07 | G | A | 2.1% | 42 | 1958 | 2000 | p.D761N  | missense_variant,splice_region_variant |
| 31A | <i>IDH1</i>   | 2  | 2.1E+08 | G | A | 2.2% | 43 | 1956 | 1999 | p.R132C  | missense_variant                       |
| 31A | <i>FGFR1</i>  | 8  | 3.8E+07 | G | A | 4.9% | 32 | 618  | 650  | p.S169L  | missense_variant                       |
| 31A | <i>CDKN2A</i> | 9  | 2.2E+07 | G | A | 3.8% | 27 | 676  | 703  | p.R131C  | missense_variant                       |
| 31A | <i>CDKN2A</i> | 9  | 2.2E+07 | C | T | 3.7% | 28 | 726  | 754  | p.V126I  | missense_variant                       |
| 31A | <i>CDKN2A</i> | 9  | 2.2E+07 | G | A | 4.8% | 36 | 716  | 752  | p.A109V  | missense_variant                       |
| 31A | <i>CDKN2A</i> | 9  | 2.2E+07 | G | A | 2.8% | 21 | 716  | 737  | p.A102V  | missense_variant                       |
| 31A | <i>CDKN2A</i> | 9  | 2.2E+07 | C | T | 3.8% | 28 | 710  | 738  | p.A102T  | missense_variant                       |
| 31B | <i>KRAS</i>   | 12 | 2.5E+07 | C | T | 3.2% | 64 | 1933 | 1997 | p.A146T  | missense_variant                       |
| 3A  | <i>ERBB4</i>  | 2  | 2.1E+08 | C | T | 3.9% | 19 | 466  | 485  | p.C308Y  | missense_variant                       |

|    |               |    |         |   |   |      |    |      |      |            |                                      |
|----|---------------|----|---------|---|---|------|----|------|------|------------|--------------------------------------|
| 3A | <i>FGFR1</i>  | 8  | 3.8E+07 | G | A | 3.8% | 73 | 1857 | 1930 | p.Q289*    | stop_gained                          |
| 3A | <i>FGFR1</i>  | 8  | 3.8E+07 | C | T | 4.8% | 23 | 455  | 478  | -          | splice_region_variant,intron_variant |
| 3A | <i>FGFR1</i>  | 8  | 3.8E+07 | C | T | 4.2% | 23 | 527  | 550  | p.E170K    | missense_variant                     |
| 3A | <i>FGFR1</i>  | 8  | 3.8E+07 | C | T | 4.0% | 30 | 724  | 754  | p.D164N    | missense_variant                     |
| 3A | <i>JAK2</i>   | 9  | 5073731 | C | G | 3.8% | 13 | 326  | 339  | p.L604V    | missense_variant                     |
| 3A | <i>CDKN2A</i> | 9  | 2.2E+07 | C | T | 4.0% | 51 | 1217 | 1268 | p.G122S    | missense_variant                     |
| 3A | <i>CDKN2A</i> | 9  | 2.2E+07 | C | T | 3.7% | 47 | 1213 | 1260 | p.A109T    | missense_variant                     |
| 3A | <i>CDKN2A</i> | 9  | 2.2E+07 | C | T | 3.7% | 46 | 1210 | 1256 | p.R107H    | missense_variant                     |
| 3A | <i>CDKN2A</i> | 9  | 2.2E+07 | G | A | 4.6% | 57 | 1190 | 1247 | p.R103W    | missense_variant                     |
| 3A | <i>ABL1</i>   | 9  | 1.3E+08 | G | A | 3.6% | 41 | 1096 | 1137 | p.V338M    | missense_variant                     |
| 3A | <i>ABL1</i>   | 9  | 1.3E+08 | G | A | 3.6% | 73 | 1927 | 2000 | p.W405*    | stop_gained                          |
| 3A | <i>NOTCH1</i> | 9  | 1.4E+08 | C | T | 3.6% | 72 | 1925 | 1997 | p.G2447S   | missense_variant                     |
| 3A | <i>RET</i>    | 10 | 4.4E+07 | C | T | 4.1% | 58 | 1372 | 1430 | p.P628L    | missense_variant                     |
| 3A | <i>RET</i>    | 10 | 4.4E+07 | G | A | 4.8% | 65 | 1278 | 1343 | p.G885R    | missense_variant                     |
| 3A | <i>PTEN</i>   | 10 | 9E+07   | G | A | 4.9% | 14 | 272  | 286  | p.?_splice | splice_acceptor_variant              |
| 3A | <i>PTEN</i>   | 10 | 9E+07   | G | A | 2.2% | 29 | 1267 | 1296 | p.W111*    | stop_gained                          |
| 3A | <i>PTEN</i>   | 10 | 9E+07   | T | C | 3.5% | 46 | 1254 | 1300 | p.L112P    | missense_variant                     |
| 3A | <i>PTEN</i>   | 10 | 9E+07   | G | A | 2.0% | 26 | 1283 | 1309 | p.V119I    | missense_variant                     |
| 3A | <i>PTEN</i>   | 10 | 9E+07   | G | A | 2.0% | 26 | 1291 | 1317 | p.G127E    | missense_variant                     |
| 3A | <i>PTEN</i>   | 10 | 9E+07   | G | A | 2.2% | 29 | 1271 | 1300 | p.R130Q    | missense_variant                     |
| 3A | <i>PTEN</i>   | 10 | 9E+07   | G | A | 3.2% | 33 | 1002 | 1035 | p.?_splice | splice_acceptor_variant              |
| 3A | <i>PTEN</i>   | 10 | 9E+07   | G | A | 2.1% | 41 | 1955 | 1996 | p.E291K    | missense_variant                     |

|    |        |    |         |   |   |      |    |      |      |            |                                        |
|----|--------|----|---------|---|---|------|----|------|------|------------|----------------------------------------|
| 3A | ATM    | 11 | 1.1E+08 | G | A | 3.5% | 17 | 462  | 479  | p.G335E    | missense_variant                       |
| 3A | ATM    | 11 | 1.1E+08 | C | T | 4.0% | 57 | 1373 | 1430 | p.P1680S   | missense_variant                       |
| 3A | ATM    | 11 | 1.1E+08 | C | T | 4.7% | 33 | 669  | 702  | -          | splice_region_variant,intron_variant   |
| 3A | ATM    | 11 | 1.1E+08 | C | T | 4.0% | 28 | 672  | 700  | p.Q2730*   | stop_gained                            |
| 3A | ATM    | 11 | 1.1E+08 | C | T | 2.8% | 26 | 908  | 934  | p.R3047*   | stop_gained                            |
| 3A | PTPN11 | 12 | 1.1E+08 | G | A | 3.0% | 32 | 1023 | 1055 | p.D61N     | missense_variant                       |
| 3A | PTPN11 | 12 | 1.1E+08 | G | A | 2.4% | 25 | 1025 | 1050 | p.E69K     | missense_variant                       |
| 3A | PTPN11 | 12 | 1.1E+08 | G | A | 3.2% | 34 | 1014 | 1048 | p.A72T     | missense_variant                       |
| 3A | FLT3   | 13 | 2.9E+07 | C | T | 3.6% | 29 | 770  | 799  | p.R607K    | missense_variant                       |
| 3A | FLT3   | 13 | 2.9E+07 | C | T | 4.2% | 35 | 805  | 840  | p.E604K    | missense_variant                       |
| 3A | FLT3   | 13 | 2.9E+07 | C | T | 3.7% | 32 | 842  | 874  | p.V592I    | missense_variant                       |
| 3A | RB1    | 13 | 4.9E+07 | C | T | 4.1% | 35 | 815  | 850  | p.Q685*    | stop_gained                            |
| 3A | RB1    | 13 | 4.9E+07 | C | T | 3.8% | 32 | 818  | 850  | p.H686Y    | missense_variant                       |
| 3A | AKT1   | 14 | 1.1E+08 | G | A | 3.9% | 51 | 1242 | 1293 | p.Q47*     | stop_gained                            |
| 3A | CDH1   | 16 | 6.9E+07 | G | A | 4.3% | 61 | 1372 | 1433 | p.?_splice | splice_acceptor_variant                |
| 3A | CDH1   | 16 | 6.9E+07 | C | T | 4.6% | 66 | 1379 | 1445 | p.P339L    | missense_variant                       |
| 3A | TP53   | 17 | 7577019 | C | T | 3.9% | 53 | 1290 | 1343 | p.A307T    | missense_variant,splice_region_variant |
| 3A | TP53   | 17 | 7577108 | C | T | 3.0% | 42 | 1345 | 1387 | p.C277Y    | missense_variant                       |
| 3A | TP53   | 17 | 7577114 | C | T | 3.6% | 50 | 1337 | 1387 | p.C275Y    | missense_variant                       |
| 3A | TP53   | 17 | 7577124 | C | T | 2.8% | 39 | 1345 | 1384 | p.V272M    | missense_variant                       |
| 3A | VHL    | 3  | 1E+07   | C | T | 3.7% | 73 | 1926 | 1999 | p.L140F    | missense_variant                       |
| 3A | TP53   | 17 | 7577532 | G | A | 2.3% | 46 | 1953 | 1999 | p.P250L    | missense_variant                       |

|    |       |    |         |   |   |      |    |      |      |         |                  |
|----|-------|----|---------|---|---|------|----|------|------|---------|------------------|
| 3A | TP53  | 17 | 7577552 | C | T | 3.9% | 78 | 1920 | 1998 | p.M243I | missense_variant |
| 3A | TP53  | 17 | 7578190 | T | C | 2.7% | 53 | 1945 | 1998 | p.Y220C | missense_variant |
| 3A | TP53  | 17 | 7578423 | C | T | 2.3% | 45 | 1950 | 1995 | p.M169I | missense_variant |
| 3A | TP53  | 17 | 7578450 | C | T | 2.5% | 49 | 1950 | 1999 | p.M160I | missense_variant |
| 3A | TP53  | 17 | 7578457 | C | T | 2.4% | 48 | 1940 | 1988 | p.R158H | missense_variant |
| 3A | TP53  | 17 | 7578476 | G | A | 2.0% | 40 | 1958 | 1998 | p.P152S | missense_variant |
| 3A | TP53  | 17 | 7579382 | G | A | 2.2% | 30 | 1313 | 1343 | p.T102I | missense_variant |
| 3A | TP53  | 17 | 7579391 | G | A | 2.0% | 28 | 1396 | 1424 | p.S99F  | missense_variant |
| 3A | TP53  | 17 | 7579395 | G | A | 2.4% | 35 | 1412 | 1447 | p.P98S  | missense_variant |
| 3A | ERBB2 | 17 | 3.8E+07 | G | A | 4.1% | 81 | 1919 | 2000 | p.E876K | missense_variant |
| 3A | SMAD4 | 18 | 4.9E+07 | G | A | 4.1% | 47 | 1092 | 1139 | p.C115Y | missense_variant |
| 3A | SMAD4 | 18 | 4.9E+07 | G | A | 4.3% | 47 | 1049 | 1096 | p.V136I | missense_variant |
| 3A | SMAD4 | 18 | 4.9E+07 | C | T | 3.9% | 78 | 1921 | 1999 | p.P198S | missense_variant |
| 3A | SMAD4 | 18 | 4.9E+07 | C | T | 3.7% | 33 | 864  | 897  | p.H261Y | missense_variant |
| 3A | SMAD4 | 18 | 4.9E+07 | C | T | 4.2% | 49 | 1117 | 1166 | p.P313S | missense_variant |
| 3A | SMAD4 | 18 | 4.9E+07 | G | A | 4.0% | 27 | 645  | 672  | p.V341I | missense_variant |
| 3A | SMAD4 | 18 | 4.9E+07 | G | A | 2.2% | 16 | 723  | 739  | p.G386D | missense_variant |
| 3A | SMAD4 | 18 | 4.9E+07 | G | A | 4.1% | 30 | 710  | 740  | p.E394K | missense_variant |
| 3A | SMAD4 | 18 | 4.9E+07 | G | A | 4.3% | 32 | 712  | 744  | p.D396N | missense_variant |
| 3A | SMAD4 | 18 | 4.9E+07 | G | A | 4.5% | 34 | 721  | 755  | p.D415N | missense_variant |
| 3A | SMAD4 | 18 | 4.9E+07 | G | A | 3.8% | 58 | 1451 | 1509 | p.G508S | missense_variant |
| 3A | SMAD4 | 18 | 4.9E+07 | C | T | 2.9% | 42 | 1408 | 1450 | p.R531W | missense_variant |

|    |         |    |         |   |   |      |    |      |      |          |                  |
|----|---------|----|---------|---|---|------|----|------|------|----------|------------------|
| 3A | SMARCB1 | 22 | 2.4E+07 | G | A | 3.9% | 78 | 1921 | 1999 | p.D170N  | missense_variant |
| 3A | SMARCB1 | 22 | 2.4E+07 | G | A | 4.6% | 42 | 874  | 916  | p.R376K  | missense_variant |
| 3A | SMARCB1 | 22 | 2.4E+07 | G | A | 3.7% | 31 | 817  | 848  | p.A379T  | missense_variant |
| 3A | CTNNB1  | 3  | 4.1E+07 | G | A | 2.5% | 25 | 986  | 1011 | p.G38D   | missense_variant |
| 3A | CTNNB1  | 3  | 4.1E+07 | G | A | 3.0% | 27 | 868  | 895  | p.S47N   | missense_variant |
| 3A | PIK3CA  | 3  | 1.8E+08 | G | A | 4.3% | 10 | 225  | 235  | p.R108H  | missense_variant |
| 3A | PIK3CA  | 3  | 1.8E+08 | G | T | 4.4% | 24 | 523  | 547  | p.M318I  | missense_variant |
| 3A | PIK3CA  | 3  | 1.8E+08 | C | T | 3.9% | 22 | 545  | 567  | p.S323F  | missense_variant |
| 3A | PIK3CA  | 3  | 1.8E+08 | G | A | 4.2% | 24 | 554  | 578  | p.W328*  | stop_gained      |
| 3A | PIK3CA  | 3  | 1.8E+08 | G | A | 3.8% | 22 | 558  | 580  | p.R335K  | missense_variant |
| 3A | PIK3CA  | 3  | 1.8E+08 | C | T | 4.2% | 24 | 554  | 578  | p.R349*  | stop_gained      |
| 3A | PIK3CA  | 3  | 1.8E+08 | G | A | 2.6% | 42 | 1597 | 1639 | p.E547K  | missense_variant |
| 3A | PIK3CA  | 3  | 1.8E+08 | G | A | 4.3% | 41 | 903  | 944  | p.D1018N | missense_variant |
| 3A | PIK3CA  | 3  | 1.8E+08 | G | A | 3.1% | 27 | 841  | 868  | p.G1049D | missense_variant |
| 3A | PIK3CA  | 3  | 1.8E+08 | G | A | 2.7% | 23 | 842  | 865  | p.G1050D | missense_variant |
| 3A | PDGFRA  | 4  | 5.5E+07 | C | T | 3.8% | 40 | 1020 | 1060 | p.P553L  | missense_variant |
| 3A | PDGFRA  | 4  | 5.5E+07 | G | A | 4.1% | 62 | 1455 | 1517 | p.E675K  | missense_variant |
| 3A | PDGFRA  | 4  | 5.5E+07 | G | A | 3.8% | 72 | 1805 | 1877 | p.V824I  | missense_variant |
| 3A | KIT     | 4  | 5.6E+07 | G | A | 4.2% | 33 | 746  | 779  | p.R55K   | missense_variant |
| 3A | KIT     | 4  | 5.6E+07 | G | A | 3.9% | 44 | 1092 | 1136 | p.G498S  | missense_variant |
| 3A | KIT     | 4  | 5.6E+07 | G | A | 4.7% | 32 | 656  | 688  | p.V559I  | missense_variant |
| 3A | KIT     | 4  | 5.6E+07 | G | A | 4.7% | 32 | 643  | 675  | p.R586K  | missense_variant |

|    |              |   |         |   |   |      |    |      |      |          |                  |
|----|--------------|---|---------|---|---|------|----|------|------|----------|------------------|
| 3A | <i>KDR</i>   | 4 | 5.6E+07 | C | T | 4.7% | 31 | 632  | 663  | p.G1348R | missense_variant |
| 3A | <i>KDR</i>   | 4 | 5.6E+07 | G | A | 4.1% | 38 | 898  | 936  | p.H891Y  | missense_variant |
| 3A | <i>KDR</i>   | 4 | 5.6E+07 | G | A | 4.8% | 29 | 581  | 610  | p.S264F  | missense_variant |
| 3A | <i>KDR</i>   | 4 | 5.6E+07 | G | A | 3.8% | 23 | 587  | 610  | p.P263L  | missense_variant |
| 3A | <i>FBXW7</i> | 4 | 1.5E+08 | C | T | 4.6% | 23 | 482  | 505  | p.E452K  | missense_variant |
| 3A | <i>FBXW7</i> | 4 | 1.5E+08 | C | T | 3.8% | 19 | 486  | 505  | p.D440N  | missense_variant |
| 3A | <i>FBXW7</i> | 4 | 1.5E+08 | C | T | 4.0% | 20 | 484  | 504  | p.G437E  | missense_variant |
| 3A | <i>FBXW7</i> | 4 | 1.5E+08 | C | T | 3.8% | 19 | 484  | 503  | p.S436N  | missense_variant |
| 3A | <i>APC</i>   | 5 | 1.1E+08 | C | T | 3.5% | 53 | 1440 | 1493 | p.P1091L | missense_variant |
| 3A | <i>APC</i>   | 5 | 1.1E+08 | G | A | 4.3% | 22 | 489  | 511  | p.E1295K | missense_variant |
| 3A | <i>APC</i>   | 5 | 1.1E+08 | G | A | 4.4% | 22 | 476  | 498  | p.E1306K | missense_variant |
| 3A | <i>APC</i>   | 5 | 1.1E+08 | C | T | 4.0% | 36 | 863  | 899  | p.S1346L | missense_variant |
| 3A | <i>APC</i>   | 5 | 1.1E+08 | C | T | 4.3% | 39 | 859  | 898  | p.S1360F | missense_variant |
| 3A | <i>APC</i>   | 5 | 1.1E+08 | C | T | 2.9% | 26 | 860  | 886  | p.Q1378* | stop_gained      |
| 3A | <i>APC</i>   | 5 | 1.1E+08 | G | A | 4.2% | 37 | 852  | 889  | p.E1379K | missense_variant |
| 3A | <i>APC</i>   | 5 | 1.1E+08 | C | T | 3.5% | 31 | 851  | 882  | p.T1380I | missense_variant |
| 3A | <i>APC</i>   | 5 | 1.1E+08 | C | T | 3.5% | 30 | 821  | 851  | p.L1382F | missense_variant |
| 3A | <i>APC</i>   | 5 | 1.1E+08 | G | A | 2.6% | 31 | 1171 | 1202 | p.E1451K | missense_variant |
| 3A | <i>ALK</i>   | 2 | 2.9E+07 | C | T | 2.1% | 39 | 1776 | 1815 | p.R1275Q | missense_variant |
| 3A | <i>APC</i>   | 5 | 1.1E+08 | C | T | 3.9% | 32 | 792  | 824  | p.S1501F | missense_variant |
| 3A | <i>APC</i>   | 5 | 1.1E+08 | G | A | 3.6% | 30 | 799  | 829  | p.S1505N | missense_variant |
| 3A | <i>APC</i>   | 5 | 1.1E+08 | C | T | 3.5% | 29 | 790  | 819  | p.Q1517* | stop_gained      |

|    |       |    |         |   |   |      |    |      |      |          |                                        |
|----|-------|----|---------|---|---|------|----|------|------|----------|----------------------------------------|
| 3A | ALK   | 2  | 2.9E+07 | G | A | 4.1% | 56 | 1299 | 1355 | p.P1191L | missense_variant                       |
| 3A | ALK   | 2  | 2.9E+07 | C | T | 3.5% | 48 | 1313 | 1361 | p.G1184R | missense_variant                       |
| 3A | ALK   | 2  | 2.9E+07 | C | T | 4.2% | 57 | 1303 | 1360 | p.V1180I | missense_variant                       |
| 3A | EGFR  | 7  | 5.5E+07 | C | T | 4.5% | 74 | 1569 | 1643 | p.P281L  | missense_variant                       |
| 3A | EGFR  | 7  | 5.5E+07 | G | A | 2.1% | 29 | 1355 | 1384 | p.G735S  | missense_variant                       |
| 3A | EGFR  | 7  | 5.5E+07 | C | T | 2.2% | 29 | 1196 | 1294 | p.T751I  | missense_variant                       |
| 3A | EGFR  | 7  | 5.5E+07 | G | A | 3.0% | 42 | 1354 | 1396 | p.D761N  | missense_variant,splice_region_variant |
| 3A | EGFR  | 7  | 5.5E+07 | C | T | 2.0% | 23 | 1148 | 1171 | p.A767V  | missense_variant                       |
| 3A | EGFR  | 7  | 5.5E+07 | G | A | 4.8% | 57 | 1137 | 1194 | p.G779S  | missense_variant                       |
| 3A | EGFR  | 7  | 5.5E+07 | C | T | 4.5% | 54 | 1136 | 1190 | p.P794S  | missense_variant                       |
| 3A | EGFR  | 7  | 5.5E+07 | G | A | 4.1% | 75 | 1745 | 1820 | p.G810S  | missense_variant                       |
| 3A | EGFR  | 7  | 5.5E+07 | G | A | 2.0% | 40 | 1957 | 1997 | p.G857R  | missense_variant                       |
| 3A | EGFR  | 7  | 5.5E+07 | G | A | 2.1% | 41 | 1958 | 1999 | p.A859T  | missense_variant                       |
| 3A | MET   | 7  | 1.2E+08 | C | T | 4.3% | 24 | 535  | 559  | p.Q826*  | stop_gained                            |
| 3A | SMO   | 7  | 1.3E+08 | G | A | 3.1% | 62 | 1938 | 2000 | p.C213Y  | missense_variant                       |
| 3A | SMO   | 7  | 1.3E+08 | C | T | 4.4% | 87 | 1910 | 1997 | p.A619V  | missense_variant                       |
| 3A | ERBB4 | 2  | 2.1E+08 | C | T | 4.6% | 58 | 1192 | 1250 | p.C593Y  | missense_variant                       |
| 3A | BRAF  | 7  | 1.4E+08 | G | A | 3.8% | 44 | 1124 | 1168 | p.Q461*  | stop_gained                            |
| 3A | KRAS  | 12 | 2.5E+07 | C | T | 4.2% | 21 | 480  | 501  | p.V114I  | missense_variant                       |
| 3A | KRAS  | 12 | 2.5E+07 | G | A | 4.1% | 38 | 891  | 929  | p.A18V   | missense_variant                       |
| 3A | KRAS  | 12 | 2.5E+07 | C | T | 4.1% | 37 | 868  | 905  | p.V7M    | missense_variant                       |
| 3B | TP53  | 17 | 7577132 | C | T | 2.0% | 40 | 1959 | 1999 | p.S269N  | missense_variant                       |

|    |               |    |         |    |    |      |    |      |      |          |                                       |
|----|---------------|----|---------|----|----|------|----|------|------|----------|---------------------------------------|
| 3B | <i>SMAD4</i>  | 18 | 4.9E+07 | G  | A  | 2.2% | 44 | 1956 | 2000 | p.R531Q  | missense_variant                      |
| 3B | <i>CDKN2A</i> | 9  | 2.2E+07 | G  | A  | 3.0% | 23 | 755  | 778  | p.P114L  | missense_variant                      |
| 3B | <i>CDKN2A</i> | 9  | 2.2E+07 | G  | A  | 3.7% | 28 | 737  | 765  | p.R107C  | missense_variant                      |
| 5A | <i>KRAS</i>   | 12 | 2.5E+07 | C  | A  | 2.0% | 36 | 1796 | 1832 | p.G12V   | missense_variant                      |
| 5B | <i>TP53</i>   | 17 | 7578417 | C  | CG | 3.9% | 76 | 1893 | 1969 | p.E171fs | frameshift_variant,feature_elongation |
| 6A | <i>TP53</i>   | 17 | 7579403 | G  | A  | 2.5% | 49 | 1947 | 1996 | p.S95F   | missense_variant                      |
| 6B | <i>APC</i>    | 5  | 1.1E+08 | AG | GA | 2.3% | 42 | 1796 | 1840 | p.K1462R | missense_variant                      |
| 7A | <i>ABL1</i>   | 9  | 1.3E+08 | G  | A  | 3.7% | 32 | 830  | 862  | p.E334K  | missense_variant                      |
| 7A | <i>NOTCH1</i> | 9  | 1.4E+08 | C  | T  | 4.3% | 27 | 595  | 622  | p.V2473I | missense_variant                      |
| 7A | <i>NOTCH1</i> | 9  | 1.4E+08 | G  | A  | 3.2% | 21 | 627  | 648  | p.Q2440* | stop_gained                           |
| 7A | <i>RET</i>    | 10 | 4.4E+07 | G  | A  | 3.6% | 19 | 503  | 522  | p.V642I  | missense_variant                      |
| 7A | <i>RET</i>    | 10 | 4.4E+07 | C  | T  | 3.4% | 27 | 760  | 787  | p.A883V  | missense_variant                      |
| 7A | <i>PTEN</i>   | 10 | 9E+07   | C  | T  | 2.2% | 44 | 1954 | 1998 | p.R234W  | missense_variant                      |
| 7A | <i>TP53</i>   | 17 | 7573964 | C  | T  | 4.0% | 71 | 1692 | 1763 | p.A355T  | missense_variant                      |
| 7A | <i>TP53</i>   | 17 | 7577033 | C  | T  | 2.3% | 27 | 1139 | 1166 | p.G302E  | missense_variant                      |
| 7A | <i>TP53</i>   | 17 | 7577085 | C  | T  | 2.7% | 32 | 1154 | 1186 | p.E285K  | missense_variant                      |
| 7A | <i>TP53</i>   | 17 | 7577099 | C  | T  | 2.5% | 30 | 1152 | 1182 | p.R280K  | missense_variant                      |
| 7A | <i>TP53</i>   | 17 | 7577112 | C  | T  | 2.0% | 23 | 1153 | 1176 | p.A276T  | missense_variant                      |
| 7A | <i>TP53</i>   | 17 | 7577118 | C  | T  | 2.6% | 30 | 1146 | 1176 | p.V274I  | missense_variant                      |
| 7A | <i>TP53</i>   | 17 | 7577127 | C  | T  | 2.4% | 28 | 1143 | 1171 | p.E271K  | missense_variant                      |
| 7A | <i>TP53</i>   | 17 | 7577142 | C  | T  | 3.0% | 35 | 1126 | 1161 | p.G266R  | missense_variant                      |
| 7A | <i>TP53</i>   | 17 | 7578407 | G  | A  | 2.2% | 18 | 785  | 803  | p.R175C  | missense_variant                      |



|    |               |    |         |   |   |      |    |      |      |          |                                        |
|----|---------------|----|---------|---|---|------|----|------|------|----------|----------------------------------------|
| 7A | <i>TP53</i>   | 17 | 7578431 | G | A | 3.1% | 25 | 775  | 800  | p.Q167*  | stop_gained                            |
| 7A | <i>TP53</i>   | 17 | 7578475 | G | A | 3.0% | 21 | 676  | 697  | p.P152L  | missense_variant                       |
| 7A | <i>TP53</i>   | 17 | 7578476 | G | A | 3.6% | 25 | 668  | 693  | p.P152S  | missense_variant                       |
| 7A | <i>STK11</i>  | 19 | 1207021 | C | T | 2.9% | 37 | 1243 | 1280 | p.Q37*   | stop_gained                            |
| 7A | <i>STK11</i>  | 19 | 1223108 | G | A | 3.7% | 26 | 670  | 696  | p.E349K  | missense_variant                       |
| 7A | <i>EGFR</i>   | 7  | 5.5E+07 | C | T | 3.6% | 48 | 1271 | 1319 | p.P296L  | missense_variant,splice_region_variant |
| 7A | <i>EGFR</i>   | 7  | 5.5E+07 | C | T | 3.3% | 25 | 744  | 769  | p.S784F  | missense_variant                       |
| 7A | <i>CDKN2A</i> | 9  | 2.2E+07 | C | T | 3.4% | 15 | 427  | 442  | p.G89S   | missense_variant                       |
| 7B | <i>BRAF</i>   | 7  | 1.4E+08 | G | A | 4.6% | 82 | 1712 | 1794 | p.Q456*  | stop_gained                            |
| 7B | <i>GNAQ</i>   | 9  | 8E+07   | C | T | 4.0% | 79 | 1920 | 1999 | p.C219Y  | missense_variant                       |
| 7B | <i>NOTCH1</i> | 9  | 1.4E+08 | G | A | 2.4% | 48 | 1952 | 2000 | p.Q2440* | stop_gained                            |
| 7B | <i>ATM</i>    | 11 | 1.1E+08 | C | T | 2.1% | 42 | 1958 | 2000 | p.R1730* | stop_gained                            |
| 7B | <i>PTPN11</i> | 12 | 1.1E+08 | G | A | 3.3% | 66 | 1930 | 1996 | p.M504I  | missense_variant                       |
| 7B | <i>RB1</i>    | 13 | 4.9E+07 | G | A | 4.4% | 23 | 503  | 526  | p.R320Q  | missense_variant                       |
| 7B | <i>IDH2</i>   | 15 | 9.1E+07 | G | A | 3.8% | 65 | 1666 | 1731 | p.R159C  | missense_variant                       |
| 7B | <i>TP53</i>   | 17 | 7577070 | G | A | 3.0% | 60 | 1936 | 1996 | p.R290C  | missense_variant                       |
| 7B | <i>TP53</i>   | 17 | 7577073 | G | A | 2.5% | 50 | 1946 | 1996 | p.L289F  | missense_variant                       |
| 7B | <i>TP53</i>   | 17 | 7577099 | C | T | 2.9% | 59 | 1941 | 2000 | p.R280K  | missense_variant                       |
| 7B | <i>TP53</i>   | 17 | 7577103 | C | T | 2.9% | 57 | 1943 | 2000 | p.G279R  | missense_variant                       |
| 7B | <i>VHL</i>    | 3  | 1E+07   | G | A | 2.3% | 46 | 1951 | 1997 | p.G144R  | missense_variant                       |
| 7B | <i>TP53</i>   | 17 | 7577604 | C | T | 2.4% | 47 | 1952 | 1999 | p.G226D  | missense_variant                       |
| 7B | <i>TP53</i>   | 17 | 7578400 | G | A | 3.0% | 61 | 1939 | 2000 | p.P177L  | missense_variant                       |

|    |                |    |         |   |   |      |    |      |      |          |                  |
|----|----------------|----|---------|---|---|------|----|------|------|----------|------------------|
| 7B | <i>TP53</i>    | 17 | 7579377 | G | A | 2.2% | 28 | 1221 | 1249 | p.Q104*  | stop_gained      |
| 7B | <i>SMAD4</i>   | 18 | 4.9E+07 | G | A | 3.5% | 65 | 1792 | 1857 | p.V333I  | missense_variant |
| 7B | <i>SMAD4</i>   | 18 | 4.9E+07 | G | A | 2.1% | 39 | 1824 | 1863 | p.R361H  | missense_variant |
| 7B | <i>SMARCB1</i> | 22 | 2.4E+07 | G | A | 3.8% | 65 | 1640 | 1705 | p.V64I   | missense_variant |
| 7B | <i>SMARCB1</i> | 22 | 2.4E+07 | G | A | 3.9% | 42 | 1036 | 1078 | p.R376K  | missense_variant |
| 7B | <i>PIK3CA</i>  | 3  | 1.8E+08 | G | A | 3.8% | 49 | 1255 | 1304 | p.A415T  | missense_variant |
| 7B | <i>FBXW7</i>   | 4  | 1.5E+08 | C | T | 3.4% | 22 | 631  | 653  | p.R465H  | missense_variant |
| 7B | <i>FBXW7</i>   | 4  | 1.5E+08 | C | T | 3.7% | 24 | 622  | 646  | p.G437R  | missense_variant |
| 7B | <i>APC</i>     | 5  | 1.1E+08 | C | T | 2.4% | 47 | 1952 | 1999 | p.Q1291* | stop_gained      |
| 7B | <i>EGFR</i>    | 7  | 5.5E+07 | G | A | 2.0% | 40 | 1959 | 1999 | p.G873E  | missense_variant |
| 7B | <i>BRAF</i>    | 7  | 1.4E+08 | C | T | 2.2% | 17 | 752  | 769  | p.V600M  | missense_variant |
| 7B | <i>CDKN2A</i>  | 9  | 2.2E+07 | G | A | 3.9% | 25 | 616  | 641  | p.T137I  | missense_variant |
| 7B | <i>CDKN2A</i>  | 9  | 2.2E+07 | G | A | 3.6% | 29 | 769  | 798  | p.R112C  | missense_variant |
| 7B | <i>CDKN2A</i>  | 9  | 2.2E+07 | G | A | 3.9% | 28 | 696  | 724  | p.R99W   | missense_variant |
| 8A | <i>TP53</i>    | 17 | 7578275 | G | A | 2.2% | 43 | 1954 | 1997 | p.Q192*  | stop_gained      |
| 8A | <i>TP53</i>    | 17 | 7578428 | G | A | 2.0% | 40 | 1960 | 2000 | p.H168Y  | missense_variant |
| 8A | <i>TP53</i>    | 17 | 7579382 | G | A | 2.3% | 37 | 1574 | 1611 | p.T102I  | missense_variant |
| 9A | <i>BRAF</i>    | 7  | 1.4E+08 | G | A | 2.3% | 18 | 754  | 772  | p.T599I  | missense_variant |
| 9A | <i>KRAS</i>    | 12 | 2.5E+07 | G | A | 3.3% | 27 | 794  | 821  | p.A146V  | missense_variant |
| 9A | <i>KRAS</i>    | 12 | 2.5E+07 | C | T | 2.7% | 33 | 1191 | 1224 | p.V14I   | missense_variant |
| 9A | <i>KRAS</i>    | 12 | 2.5E+07 | C | T | 2.0% | 24 | 1200 | 1224 | p.G12S   | missense_variant |
| 9A | <i>CDKN2A</i>  | 9  | 2.2E+07 | G | A | 2.7% | 33 | 1168 | 1201 | p.A76V   | missense_variant |

|    |               |    |         |   |   |      |    |      |      |            |                                        |
|----|---------------|----|---------|---|---|------|----|------|------|------------|----------------------------------------|
| 9A | <i>CDKN2A</i> | 9  | 2.2E+07 | G | A | 4.3% | 51 | 1141 | 1192 | p.P70S     | missense_variant                       |
| 9A | <i>RET</i>    | 10 | 4.4E+07 | C | T | 4.6% | 33 | 682  | 715  | p.P628L    | missense_variant                       |
| 9A | <i>RET</i>    | 10 | 4.4E+07 | C | T | 4.4% | 23 | 503  | 526  | p.A654V    | missense_variant                       |
| 9A | <i>RET</i>    | 10 | 4.4E+07 | C | T | 3.7% | 54 | 1387 | 1441 | p.S891L    | missense_variant                       |
| 9A | <i>RET</i>    | 10 | 4.4E+07 | C | T | 4.3% | 44 | 974  | 1018 | -          | splice_region_variant,intron_variant   |
| 9A | <i>PTEN</i>   | 10 | 9E+07   | G | A | 3.3% | 47 | 1393 | 1440 | p.G132S    | missense_variant                       |
| 9A | <i>PTEN</i>   | 10 | 9E+07   | G | A | 3.8% | 26 | 665  | 691  | p.?_splice | splice_acceptor_variant                |
| 9A | <i>PTEN</i>   | 10 | 9E+07   | G | A | 2.0% | 14 | 680  | 694  | p.G165R    | missense_variant,splice_region_variant |
| 9A | <i>PTEN</i>   | 10 | 9E+07   | C | T | 3.5% | 25 | 683  | 708  | p.P169L    | missense_variant                       |
| 9A | <i>PTEN</i>   | 10 | 9E+07   | C | T | 2.0% | 32 | 1591 | 1623 | p.P246L    | missense_variant                       |
| 9A | <i>ATM</i>    | 11 | 1.1E+08 | C | T | 2.0% | 39 | 1959 | 1998 | p.R2691C   | missense_variant                       |
| 9A | <i>ATM</i>    | 11 | 1.1E+08 | C | T | 2.4% | 30 | 1221 | 1251 | p.R3047*   | stop_gained                            |
| 9A | <i>PTPN11</i> | 12 | 1.1E+08 | G | A | 2.6% | 50 | 1846 | 1896 | p.E69K     | missense_variant                       |
| 9A | <i>FLT3</i>   | 13 | 2.9E+07 | C | T | 3.8% | 35 | 882  | 917  | p.D600N    | missense_variant                       |
| 9A | <i>RB1</i>    | 13 | 4.9E+07 | T | C | 4.0% | 18 | 432  | 450  | -          | splice_region_variant,intron_variant   |
| 9A | <i>RB1</i>    | 13 | 4.9E+07 | C | T | 3.7% | 16 | 420  | 436  | p.L343F    | missense_variant                       |
| 9A | <i>RB1</i>    | 13 | 4.9E+07 | C | T | 3.1% | 16 | 506  | 522  | p.R358*    | stop_gained                            |
| 9A | <i>IDH2</i>   | 15 | 9.1E+07 | C | T | 3.8% | 50 | 1267 | 1317 | p.R159H    | missense_variant                       |
| 9A | <i>IDH2</i>   | 15 | 9.1E+07 | G | A | 2.1% | 26 | 1225 | 1251 | p.R140W    | missense_variant                       |
| 9A | <i>TP53</i>   | 17 | 7577033 | C | T | 2.9% | 35 | 1178 | 1213 | p.G302E    | missense_variant                       |
| 9A | <i>TP53</i>   | 17 | 7577061 | C | T | 3.6% | 44 | 1185 | 1229 | p.G293R    | missense_variant                       |
| 9A | <i>TP53</i>   | 17 | 7577120 | C | T | 2.4% | 29 | 1204 | 1233 | p.R273H    | missense_variant                       |

|    |        |    |         |   |   |      |    |      |      |            |                                        |
|----|--------|----|---------|---|---|------|----|------|------|------------|----------------------------------------|
| 9A | TP53   | 17 | 7577142 | C | T | 2.7% | 33 | 1189 | 1222 | p.G266R    | missense_variant                       |
| 9A | TP53   | 17 | 7578205 | C | T | 2.6% | 51 | 1946 | 1997 | p.S215N    | missense_variant                       |
| 9A | TP53   | 17 | 7578263 | G | A | 2.3% | 45 | 1948 | 1993 | p.R196*    | stop_gained                            |
| 9A | TP53   | 17 | 7578371 | C | T | 3.4% | 44 | 1268 | 1312 | p.G187S    | missense_variant,splice_region_variant |
| 9A | TP53   | 17 | 7578419 | C | T | 2.2% | 28 | 1242 | 1270 | p.E171K    | missense_variant                       |
| 9A | TP53   | 17 | 7578427 | T | G | 2.4% | 30 | 1241 | 1271 | p.H168P    | missense_variant                       |
| 9A | TP53   | 17 | 7578457 | C | T | 2.1% | 23 | 1082 | 1105 | p.R158H    | missense_variant                       |
| 9A | TP53   | 17 | 7579373 | C | T | 2.6% | 19 | 707  | 726  | p.G105D    | missense_variant                       |
| 9A | TP53   | 17 | 7579395 | G | A | 2.7% | 23 | 830  | 853  | p.P98S     | missense_variant                       |
| 9A | TP53   | 17 | 7579403 | G | A | 2.1% | 18 | 847  | 865  | p.S95F     | missense_variant                       |
| 9A | TP53   | 17 | 7579422 | G | A | 3.8% | 34 | 857  | 891  | p.P89S     | missense_variant                       |
| 9A | TP53   | 17 | 7579436 | G | A | 3.0% | 27 | 860  | 887  | p.A84V     | missense_variant                       |
| 9A | TP53   | 17 | 7579464 | G | A | 3.8% | 35 | 886  | 921  | p.P75S     | missense_variant                       |
| 9A | SMAD4  | 18 | 4.9E+07 | G | A | 4.2% | 59 | 1353 | 1412 | p.V128M    | missense_variant                       |
| 9A | SMAD4  | 18 | 4.9E+07 | G | A | 3.9% | 35 | 858  | 893  | p.D424N    | missense_variant                       |
| 9A | PIK3CA | 3  | 1.8E+08 | G | A | 4.4% | 31 | 668  | 699  | p.?_splice | splice_donor_variant                   |
| 9A | PIK3CA | 3  | 1.8E+08 | G | A | 3.8% | 48 | 1227 | 1275 | p.E321K    | missense_variant                       |
| 9A | PIK3CA | 3  | 1.8E+08 | C | T | 2.0% | 33 | 1656 | 1689 | p.A1020V   | missense_variant                       |
| 9A | FGFR3  | 4  | 1808898 | C | T | 4.1% | 54 | 1255 | 1309 | p.T777I    | missense_variant                       |
| 9A | FGFR3  | 4  | 1808981 | C | T | 4.5% | 45 | 959  | 1004 | p.R805W    | missense_variant                       |
| 9A | KIT    | 4  | 5.6E+07 | G | A | 3.1% | 41 | 1289 | 1330 | p.E562K    | missense_variant                       |
| 9A | KIT    | 4  | 5.6E+07 | C | T | 2.1% | 28 | 1296 | 1324 | p.L576F    | missense_variant                       |

|    |               |   |         |   |   |      |    |      |      |          |                                        |
|----|---------------|---|---------|---|---|------|----|------|------|----------|----------------------------------------|
| 9A | <i>KIT</i>    | 4 | 5.6E+07 | C | T | 2.5% | 34 | 1306 | 1340 | p.P577S  | missense_variant                       |
| 9A | <i>KIT</i>    | 4 | 5.6E+07 | C | T | 2.3% | 45 | 1952 | 1997 | p.T670I  | missense_variant                       |
| 9A | <i>KDR</i>    | 4 | 5.6E+07 | C | T | 3.8% | 55 | 1403 | 1458 | p.G1348E | missense_variant                       |
| 9A | <i>KDR</i>    | 4 | 5.6E+07 | G | A | 4.4% | 64 | 1389 | 1453 | p.P1345L | missense_variant                       |
| 9A | <i>KDR</i>    | 4 | 5.6E+07 | C | T | 3.9% | 77 | 1921 | 1998 | p.V1294M | missense_variant                       |
| 9A | <i>KDR</i>    | 4 | 5.6E+07 | G | A | 4.7% | 69 | 1394 | 1463 | p.S884F  | missense_variant                       |
| 9A | <i>FBXW7</i>  | 4 | 1.5E+08 | C | T | 3.5% | 34 | 928  | 962  | p.E449K  | missense_variant                       |
| 9A | <i>FBXW7</i>  | 4 | 1.5E+08 | C | T | 3.6% | 35 | 927  | 962  | p.V445M  | missense_variant                       |
| 9A | <i>APC</i>    | 5 | 1.1E+08 | C | T | 3.5% | 37 | 1012 | 1049 | p.P1319L | missense_variant                       |
| 9A | <i>APC</i>    | 5 | 1.1E+08 | C | T | 2.5% | 34 | 1306 | 1340 | p.A1366V | missense_variant                       |
| 9A | <i>EGFR</i>   | 7 | 5.5E+07 | C | T | 3.6% | 31 | 840  | 871  | p.P281S  | missense_variant                       |
| 9A | <i>EGFR</i>   | 7 | 5.5E+07 | C | T | 3.8% | 44 | 1118 | 1162 | p.A289V  | missense_variant                       |
| 9A | <i>EGFR</i>   | 7 | 5.5E+07 | G | A | 2.4% | 47 | 1953 | 2000 | p.G719S  | missense_variant                       |
| 9A | <i>EGFR</i>   | 7 | 5.5E+07 | G | A | 4.2% | 43 | 993  | 1036 | p.G729E  | missense_variant,splice_region_variant |
| 9A | <i>EGFR</i>   | 7 | 5.5E+07 | G | A | 4.6% | 48 | 992  | 1040 | p.E736K  | missense_variant                       |
| 9A | <i>EGFR</i>   | 7 | 5.5E+07 | C | T | 4.1% | 43 | 1006 | 1049 | p.A750V  | missense_variant                       |
| 9A | <i>EGFR</i>   | 7 | 5.5E+07 | G | A | 2.4% | 37 | 1531 | 1568 | p.G810D  | missense_variant                       |
| 9A | <i>SMO</i>    | 7 | 1.3E+08 | C | T | 3.5% | 69 | 1930 | 1999 | p.P610S  | missense_variant                       |
| 9A | <i>IDH1</i>   | 2 | 2.1E+08 | C | T | 2.1% | 42 | 1958 | 2000 | p.R132H  | missense_variant                       |
| 9A | <i>FGFR1</i>  | 8 | 3.8E+07 | G | A | 4.3% | 34 | 764  | 798  | p.S158L  | missense_variant                       |
| 9A | <i>CDKN2A</i> | 9 | 2.2E+07 | C | T | 3.9% | 23 | 567  | 590  | p.R131H  | missense_variant                       |
| 9A | <i>CDKN2A</i> | 9 | 2.2E+07 | G | A | 3.6% | 21 | 568  | 589  | p.R131C  | missense_variant                       |

|     |        |    |         |    |    |      |    |      |      |            |                                      |
|-----|--------|----|---------|----|----|------|----|------|------|------------|--------------------------------------|
| 10A | APC    | 5  | 1.1E+08 | AG | GA | 2.2% | 41 | 1817 | 1861 | p.K1462R   | missense_variant                     |
| 11A | TP53   | 17 | 7577018 | C  | T  | 2.0% | 29 | 1399 | 1428 | p.?_splice | splice_donor_variant                 |
| 11A | APC    | 5  | 1.1E+08 | AG | GA | 2.0% | 37 | 1811 | 1850 | p.K1462R   | missense_variant                     |
| 13B | TP53   | 17 | 7578380 | C  | T  | 2.0% | 40 | 1959 | 1999 | p.D184N    | missense_variant                     |
| 14A | TP53   | 17 | 7577539 | GG | AA | 2.6% | 21 | 775  | 796  | p.R248W    | missense_variant                     |
| 14A | TP53   | 17 | 7579382 | G  | A  | 2.2% | 42 | 1888 | 1930 | p.T102I    | missense_variant                     |
| 14B | APC    | 5  | 1.1E+08 | C  | T  | 2.5% | 49 | 1951 | 2000 | p.Q1367*   | stop_gained                          |
| 15A | RET    | 10 | 4.4E+07 | G  | A  | 4.2% | 36 | 827  | 863  | -          | splice_region_variant,intron_variant |
| 15A | IDH2   | 15 | 9.1E+07 | C  | T  | 2.2% | 30 | 1350 | 1380 | p.R140Q    | missense_variant                     |
| 15A | TP53   | 17 | 7577132 | C  | T  | 2.2% | 33 | 1441 | 1474 | p.S269N    | missense_variant                     |
| 15A | TP53   | 17 | 7578370 | C  | T  | 3.6% | 40 | 1084 | 1124 | p.?_splice | splice_donor_variant                 |
| 15A | TP53   | 17 | 7578413 | C  | G  | 2.2% | 25 | 239  | 1125 | p.V173L    | missense_variant                     |
| 15A | TP53   | 17 | 7578431 | G  | A  | 2.5% | 29 | 1109 | 1138 | p.Q167*    | stop_gained                          |
| 15A | TP53   | 17 | 7578476 | G  | A  | 2.6% | 25 | 947  | 972  | p.P152S    | missense_variant                     |
| 15A | TP53   | 17 | 7579377 | G  | A  | 3.1% | 19 | 594  | 613  | p.Q104*    | stop_gained                          |
| 15A | GNA11  | 19 | 3118925 | G  | A  | 3.5% | 27 | 745  | 772  | p.M203I    | missense_variant                     |
| 15A | EGFR   | 7  | 5.5E+07 | C  | T  | 2.3% | 27 | 1167 | 1194 | p.S784F    | missense_variant                     |
| 15A | CDKN2A | 9  | 2.2E+07 | C  | T  | 2.5% | 10 | 396  | 406  | p.R131H    | missense_variant                     |
| 15A | CDKN2A | 9  | 2.2E+07 | G  | A  | 2.5% | 27 | 1063 | 1090 | p.A76V     | missense_variant                     |
| 17A | APC    | 5  | 1.1E+08 | G  | T  | 4.8% | 96 | 1898 | 1994 | p.E1286*   | stop_gained                          |
| 17B | APC    | 5  | 1.1E+08 | AG | GA | 2.1% | 39 | 1858 | 1901 | p.K1462R   | missense_variant                     |
| 19A | KRAS   | 12 | 2.5E+07 | G  | A  | 2.1% | 22 | 1002 | 1024 | p.A146V    | missense_variant                     |

|     |                |    |         |    |    |      |    |      |      |            |                                                        |
|-----|----------------|----|---------|----|----|------|----|------|------|------------|--------------------------------------------------------|
| 19A | <i>ABL1</i>    | 9  | 1.3E+08 | G  | A  | 4.3% | 22 | 488  | 510  | p.G321E    | missense_variant                                       |
| 19A | <i>NOTCH1</i>  | 9  | 1.4E+08 | G  | A  | 3.6% | 20 | 537  | 557  | p.S1589F   | missense_variant                                       |
| 19A | <i>IDH2</i>    | 15 | 9.1E+07 | C  | T  | 2.0% | 29 | 1387 | 1416 | p.R140Q    | missense_variant                                       |
| 19A | <i>STK11</i>   | 19 | 1220499 | G  | A  | 4.3% | 20 | 444  | 464  | p.A198T    | missense_variant                                       |
| 19A | <i>EGFR</i>    | 7  | 5.5E+07 | G  | A  | 2.2% | 17 | 754  | 771  | p.V774M    | missense_variant                                       |
| 19A | <i>EGFR</i>    | 7  | 5.5E+07 | G  | A  | 3.2% | 63 | 1937 | 2000 | p.G873E    | missense_variant                                       |
| 1B  | <i>APC</i>     | 5  | 1.1E+08 | AG | GA | 2.3% | 42 | 1791 | 1835 | p.K1462R   | missense_variant                                       |
| 20A | <i>SMARCB1</i> | 22 | 2.4E+07 | C  | A  | 4.5% | 59 | 1242 | 1301 | p.T72K     | missense_variant                                       |
| 20A | <i>CDKN2A</i>  | 9  | 2.2E+07 | G  | A  | 2.0% | 13 | 639  | 652  | p.A102V    | missense_variant                                       |
| 21A | <i>CDKN2A</i>  | 9  | 2.2E+07 | C  | T  | 2.2% | 12 | 541  | 553  | p.?_splice | splice_acceptor_variant                                |
| 22A | <i>TP53</i>    | 17 | 7577099 | C  | T  | 2.1% | 41 | 1959 | 2000 | p.R280K    | missense_variant                                       |
| 22A | <i>TP53</i>    | 17 | 7578263 | G  | A  | 2.2% | 44 | 1953 | 1997 | p.R196*    | stop_gained                                            |
| 22A | <i>TP53</i>    | 17 | 7579394 | G  | A  | 2.3% | 32 | 1383 | 1415 | p.P98L     | missense_variant                                       |
| 22A | <i>PIK3CA</i>  | 3  | 1.8E+08 | G  | A  | 3.2% | 63 | 1931 | 1994 | p.A1066T   | missense_variant                                       |
| 23B | <i>TP53</i>    | 17 | 7577138 | C  | T  | 2.0% | 39 | 1952 | 1991 | p.R267Q    | missense_variant                                       |
| 23B | <i>CDKN2A</i>  | 9  | 2.2E+07 | C  | T  | 2.1% | 25 | 1192 | 1217 | p.R131H    | missense_variant                                       |
| 24B | <i>APC</i>     | 5  | 1.1E+08 | AG | GA | 2.0% | 38 | 1839 | 1878 | p.K1462R   | missense_variant                                       |
| 25A | <i>FGFR3</i>   | 4  | 1806083 | G  | A  | 3.5% | 14 | 391  | 405  | p.E368K    | missense_variant                                       |
| 25A | <i>FGFR3</i>   | 4  | 1806170 | C  | T  | 3.6% | 12 | 321  | 333  | p.R397C    | missense_variant                                       |
| 26A | <i>TP53</i>    | 17 | 7577557 | AG | A  | 2.5% | 30 | 1167 | 1197 | p.C242fs   | frameshift_variant,missense_variant,feature_truncation |
| 27A | <i>APC</i>     | 5  | 1.1E+08 | AG | GA | 2.2% | 42 | 1826 | 1871 | p.K1462R   | missense_variant                                       |
| 27A | <i>JAK2</i>    | 9  | 5073770 | G  | T  | 2.5% | 50 | 1946 | 1996 | p.V617F    | missense_variant                                       |

|     |             |    |         |   |   |      |    |      |      |         |                  |
|-----|-------------|----|---------|---|---|------|----|------|------|---------|------------------|
| 29A | <i>KRAS</i> | 12 | 2.5E+07 | C | T | 2.3% | 44 | 1849 | 1893 | p.G12D  | missense_variant |
| 29B | <i>APC</i>  | 5  | 1.1E+08 | C | T | 4.7% | 94 | 1906 | 2000 | p.R876* | stop_gained      |

A :specimens were collected by biopsy before nCRT

B : specimens were collected by surgery after nCRT

\*indicated stop codon.



**Supplementary Table S5. Number of genetic variants detected in patients with rectal carcinoma**

|                        |          |              | Synonymous |       |              | Nonsynonymous |       |
|------------------------|----------|--------------|------------|-------|--------------|---------------|-------|
| Tumor regression Grade | Patients | polymorphism | mutation   | total | polymorphism | mutation      | total |
| 1                      | 1A       | 6            | 0          | 6     | 3            | 1             | 4     |
| 1                      | 1B       | 6            | 0          | 6     | 3            | 0             | 3     |
| 1                      | 2A       | 4            | 5          | 9     | 4            | 4             | 8     |
| 1                      | 2B       | 4            | 2          | 6     | 3            | 0             | 3     |
| 0                      | 3A       | 9            | 15         | 24    | 5            | 28            | 33    |
| 0                      | 3B       | 8            | 1          | 9     | 3            | 0             | 3     |
| 0                      | 4A       | 5            | 0          | 5     | 3            | 3             | 6     |
| 0                      | 4B       | 5            | 0          | 5     | 3            | 0             | 3     |
| 2                      | 5A       | 7            | 0          | 7     | 2            | 4             | 6     |
| 2                      | 5B       | 7            | 0          | 7     | 2            | 0             | 2     |
| 0                      | 6A       | 6            | 0          | 6     | 3            | 3             | 6     |
| 0                      | 6B       | 6            | 0          | 6     | 3            | 0             | 3     |
| 1                      | 7A       | 6            | 1          | 7     | 4            | 4             | 8     |
| 1                      | 7B       | 6            | 0          | 6     | 4            | 1             | 5     |
| 0                      | 8A       | 6            | 0          | 6     | 2            | 3             | 5     |
| 0                      | 8B       | 6            | 0          | 6     | 2            | 0             | 2     |

|   |     |   |   |   |   |   |   |
|---|-----|---|---|---|---|---|---|
| 1 | 9A  | 7 | 1 | 8 | 4 | 5 | 9 |
| 1 | 9B  | 4 | 0 | 4 | 4 | 0 | 4 |
| 2 | 10A | 5 | 0 | 5 | 4 | 2 | 6 |
| 2 | 10B | 6 | 0 | 6 | 4 | 0 | 4 |
| 1 | 11A | 5 | 0 | 5 | 3 | 2 | 5 |
| 1 | 11B | 5 | 0 | 5 | 3 | 0 | 3 |
| 2 | 13A | 6 | 1 | 7 | 1 | 3 | 4 |
| 2 | 13B | 5 | 1 | 6 | 1 | 0 | 1 |
| 3 | 14A | 6 | 0 | 6 | 3 | 2 | 5 |
| 3 | 14B | 6 | 0 | 6 | 3 | 0 | 3 |
| 2 | 15A | 6 | 1 | 7 | 3 | 3 | 6 |
| 2 | 15B | 7 | 1 | 8 | 3 | 0 | 3 |
| 0 | 17A | 6 | 0 | 6 | 4 | 1 | 5 |
| 0 | 17B | 6 | 0 | 6 | 4 | 0 | 4 |
| 3 | 18A | 6 | 0 | 6 | 4 | 3 | 7 |
| 3 | 18B | 6 | 0 | 6 | 4 | 4 | 8 |
| 0 | 19A | 8 | 0 | 8 | 3 | 4 | 7 |
| 0 | 19B | 8 | 0 | 8 | 3 | 0 | 3 |
| 2 | 20A | 3 | 0 | 3 | 3 | 1 | 4 |

|   |     |     |     |     |     |     |     |
|---|-----|-----|-----|-----|-----|-----|-----|
| 2 | 20B | 3   | 0   | 3   | 3   | 1   | 4   |
| 0 | 21A | 5   | 0   | 5   | 5   | 2   | 7   |
| 0 | 21B | N.A | N.A | N.A | N.A | N.A | N.A |
| 2 | 22A | 4   | 0   | 4   | 3   | 1   | 4   |
| 2 | 22B | 4   | 0   | 4   | 3   | 0   | 3   |
| 1 | 23A | 5   | 0   | 5   | 3   | 3   | 6   |
| 1 | 23B | 5   | 0   | 5   | 3   | 2   | 5   |
| 1 | 24A | 5   | 0   | 5   | 3   | 6   | 9   |
| 1 | 24B | 5   | 0   | 5   | 3   | 1   | 4   |
| 1 | 25A | 7   | 0   | 7   | 2   | 2   | 4   |
| 1 | 25B | 7   | 0   | 7   | 2   | 2   | 4   |
| 0 | 26A | 7   | 1   | 8   | 2   | 2   | 4   |
| 0 | 26B | N.A | N.A | N.A | N.A | N.A | N.A |
| 1 | 27A | 5   | 0   | 5   | 2   | 4   | 6   |
| 1 | 27B | 5   | 0   | 5   | 2   | 1   | 3   |
| 0 | 28A | 6   | 0   | 6   | 3   | 2   | 5   |
| 0 | 28B | N.A | N.A | N.A | N.A | N.A | N.A |
| 2 | 29A | 9   | 0   | 9   | 3   | 4   | 7   |
| 2 | 29B | 9   | 0   | 9   | 3   | 3   | 6   |

|   |     |   |   |   |   |   |    |
|---|-----|---|---|---|---|---|----|
| 1 | 30A | 5 | 0 | 5 | 3 | 4 | 7  |
| 1 | 30B | 5 | 0 | 5 | 3 | 1 | 4  |
| 1 | 31A | 6 | 0 | 6 | 3 | 8 | 11 |
| 1 | 31B | 6 | 0 | 6 | 3 | 0 | 3  |

A : specimens were collected by biopsy before nCRT

B : specimens were collected by surgery after nCRT

N.A: Not Applicable

**Supplementary Table S6. The associations between gene mutation status responses from patients with rectal carcinoma.**

|              | Tumor regression |        |           |        | p value            |
|--------------|------------------|--------|-----------|--------|--------------------|
|              | Grade 0          |        | Grade 1-3 |        |                    |
|              | n                | (%)    | n         | (%)    |                    |
|              |                  |        |           |        |                    |
| <b>ABL 1</b> |                  |        |           |        | n/a                |
| WT           | 9                | (31.0) | 20        | (69.0) |                    |
| Mutation     | 0                | (0.0)  | 0         | (0.0)  |                    |
| <b>AKT 1</b> |                  |        |           |        | n/a                |
| WT           | 9                | (31.0) | 20        | (69.0) |                    |
| Mutation     | 0                | (0.0)  | 0         | (0.0)  |                    |
| <b>ALK</b>   |                  |        |           |        | 0.532 <sup>b</sup> |
| WT           | 8                | (29.6) | 19        | (70.4) |                    |
| Mutation     | 1                | (50.0) | 1         | (50.0) |                    |
| <b>APC</b>   |                  |        |           |        | 0.431 <sup>b</sup> |
| WT           | 2                | (20.0) | 8         | (80.0) |                    |
| Mutation     | 7                | (36.8) | 12        | (63.2) |                    |
| <b>ATM</b>   |                  |        |           |        | 1.000 <sup>b</sup> |
| WT           | 8                | (33.3) | 16        | (66.7) |                    |
| Mutation     | 1                | (20.0) | 4         | (80.0) |                    |
| <b>BRAF</b>  |                  |        |           |        | 0.633 <sup>b</sup> |
| WT           | 8                | (34.8) | 15        | (65.2) |                    |

|               |   |        |    |        |                    |
|---------------|---|--------|----|--------|--------------------|
| Mutation      | 1 | (16.7) | 5  | (83.3) |                    |
| <b>CDH1</b>   |   |        |    |        | n/a                |
| WT            | 9 | (31.0) | 20 | (69.0) |                    |
| Mutation      | 0 | (0.0)  | 0  | (0.0)  |                    |
| <b>CDKN2A</b> |   |        |    |        | 0.675 <sup>b</sup> |
| WT            | 7 | (35.0) | 13 | (65.0) |                    |
| Mutation      | 2 | (22.2) | 7  | (77.8) |                    |
| <b>CHL</b>    |   |        |    |        | n/a                |
| WT            | 9 | (31.0) | 20 | (69.0) |                    |
| Mutation      | 0 | (0.0)  | 0  | (0.0)  |                    |
| <b>CTNNB1</b> |   |        |    |        | 1.000 <sup>b</sup> |
| WT            | 8 | (30.8) | 18 | (69.2) |                    |
| Mutation      | 1 | (33.3) | 2  | (66.7) |                    |
| <b>EGFR</b>   |   |        |    |        | 1.000 <sup>b</sup> |
| WT            | 7 | (31.8) | 15 | (68.2) |                    |
| Mutation      | 2 | (28.6) | 5  | (71.4) |                    |
| <b>ERBB2</b>  |   |        |    |        | n/a                |
| WT            | 9 | (31.0) | 20 | (69.0) |                    |
| Mutation      | 0 | (0.0)  | 0  | (0.0)  |                    |
| <b>ERBB4</b>  |   |        |    |        | 1.000 <sup>b</sup> |
| WT            | 8 | (30.8) | 18 | (69.2) |                    |
| Mutation      | 1 | (33.3) | 2  | (66.7) |                    |
| <b>FBXW7</b>  |   |        |    |        | 0.339 <sup>b</sup> |

|              |   |         |    |         |                    |
|--------------|---|---------|----|---------|--------------------|
| WT           | 6 | (26.1)  | 17 | (73.9)  | 0.633 <sup>b</sup> |
| Mutation     | 3 | (50.0)  | 3  | (50.0)  |                    |
| <b>FGFR1</b> |   |         |    |         |                    |
| WT           | 7 | (29.2)  | 17 | (70.8)  | 1.000 <sup>b</sup> |
| Mutation     | 2 | (40.0)  | 3  | (60.0)  |                    |
| <b>FGFR3</b> |   |         |    |         |                    |
| WT           | 8 | (30.8)  | 18 | (69.2)  | 1.000 <sup>b</sup> |
| Mutation     | 1 | (33.3)  | 2  | (66.7)  |                    |
| <b>FLT3</b>  |   |         |    |         |                    |
| WT           | 8 | (32.0)  | 17 | (68.0)  | 1.000 <sup>b</sup> |
| Mutation     | 1 | (25.0)  | 3  | (75.0)  |                    |
| <b>GNA11</b> |   |         |    |         |                    |
| WT           | 9 | (33.3)  | 18 | (66.7)  | 0.310 <sup>b</sup> |
| Mutation     | 0 | (0.0)   | 2  | (100.0) |                    |
| <b>GNAQ</b>  |   |         |    |         |                    |
| WT           | 8 | (28.6)  | 20 | (71.4)  | 1.000 <sup>b</sup> |
| Mutation     | 1 | (100.0) | 0  | (0.0)   |                    |
| <b>IDH2</b>  |   |         |    |         |                    |
| WT           | 9 | (32.1)  | 19 | (67.9)  | n/a                |
| Mutation     | 0 | (0.0)   | 1  | (100.0) |                    |
| <b>JAK2</b>  |   |         |    |         |                    |
| WT           | 9 | (31.0)  | 20 | (69.0)  |                    |
| Mutation     | 0 | (0.0)   | 0  | (0.0)   |                    |

|               |   |        |    |        |  |                     |
|---------------|---|--------|----|--------|--|---------------------|
| <b>KDR</b>    |   |        |    |        |  | 1.000 <sup>b</sup>  |
| WT            | 8 | (32.0) | 17 | (68.0) |  |                     |
| Mutation      | 1 | (25.0) | 3  | (75.0) |  |                     |
| <b>KIT</b>    |   |        |    |        |  | 1.000 <sup>b</sup>  |
| WT            | 8 | (33.3) | 16 | (66.7) |  |                     |
| Mutation      | 1 | (20.0) | 4  | (80.0) |  |                     |
| <b>KRAS</b>   |   |        |    |        |  | 0.245 <sup>b</sup>  |
| WT            | 3 | (20.0) | 12 | (80.0) |  |                     |
| Mutation      | 6 | (42.9) | 8  | (57.1) |  |                     |
| <b>MET</b>    |   |        |    |        |  | <0.001 <sup>b</sup> |
| WT            | 2 | (9.5)  | 19 | (90.5) |  |                     |
| Mutation      | 7 | (87.5) | 1  | (12.5) |  |                     |
| <b>NOTCH1</b> |   |        |    |        |  | n/a                 |
| WT            | 9 | (31.0) | 20 | (69.0) |  |                     |
| Mutation      | 0 | (0.0)  | 0  | (0.0)  |  |                     |
| <b>PDGFRA</b> |   |        |    |        |  | n/a                 |
| WT            | 9 | (31.0) | 20 | (69.0) |  |                     |
| Mutation      | 0 | (0.0)  | 0  | (0.0)  |  |                     |
| <b>PIK3CA</b> |   |        |    |        |  | 0.107 <sup>b</sup>  |
| WT            | 8 | (42.1) | 11 | (57.9) |  |                     |
| Mutation      | 1 | (10.0) | 9  | (90.0) |  |                     |
| <b>PTEN</b>   |   |        |    |        |  | 0.633 <sup>b</sup>  |
| WT            | 8 | (34.8) | 15 | (65.2) |  |                     |



|                |   |        |    |         |                    |
|----------------|---|--------|----|---------|--------------------|
| Mutation       | 1 | (16.7) | 5  | (83.3)  | 0.280 <sup>b</sup> |
| <b>PTPN11</b>  |   |        |    |         |                    |
| WT             | 9 | (36.0) | 16 | (64.0)  |                    |
| Mutation       | 0 | (0.0)  | 4  | (100.0) | 1.000 <sup>b</sup> |
| <b>RB1</b>     |   |        |    |         |                    |
| WT             | 8 | (30.8) | 18 | (69.2)  |                    |
| Mutation       | 1 | (33.3) | 2  | (66.7)  | 1.000 <sup>b</sup> |
| <b>RET</b>     |   |        |    |         |                    |
| WT             | 8 | (33.3) | 16 | (66.7)  |                    |
| Mutation       | 1 | (20.0) | 4  | (80.0)  | 0.633 <sup>b</sup> |
| <b>SMAD4</b>   |   |        |    |         |                    |
| WT             | 8 | (34.8) | 15 | (65.2)  |                    |
| Mutation       | 1 | (16.7) | 5  | (83.3)  | 0.532 <sup>b</sup> |
| <b>SMARCB1</b> |   |        |    |         |                    |
| WT             | 8 | (29.6) | 19 | (70.4)  |                    |
| Mutation       | 1 | (50.0) | 1  | (50.0)  | n/a                |
| <b>SMO</b>     |   |        |    |         |                    |
| WT             | 9 | (31.0) | 20 | (69.0)  |                    |
| Mutation       | 0 | (0.0)  | 0  | (0.0)   | 1.000 <sup>b</sup> |
| <b>STK11</b>   |   |        |    |         |                    |
| WT             | 8 | (30.8) | 18 | (69.2)  |                    |
| Mutation       | 1 | (33.3) | 2  | (66.7)  | 0.532 <sup>b</sup> |
| <b>TP53</b>    |   |        |    |         |                    |

|          |   |        |    |        |
|----------|---|--------|----|--------|
| WT       | 1 | (50.0) | 1  | (50.0) |
| Mutation | 8 | (29.6) | 19 | (70.4) |

---

<sup>a</sup>*p-value* is estimated by chi-square test

<sup>b</sup>*p-value* is estimated by ***Fisher's test***
